# Supplementary material
Source: PubMed Central journal article supplement (PMC8885925)
Supplement: NIHMS1734159-supplement-1.pdf [file NIHMS1734159-supplement-1.pdf]

## Supporting Information

### Appendix S1. Imaging Procedure

For pre-processing data, the Data Analysis, Informatics, and Resources Center (DAIRC) of ABCD utilizes the Multi-Modal Processing Stream (MMPS) which consists of a toolbox of MATLAB functions; Python, sh, and csh scripts; and C++ compiled executables. In addition, MMPS incorporates several software packages, including FreeSurfer (1), AFNI (2), and FSL (3, 4). The T<sub>1</sub>w acquisition (1 mm isotropic) was a 3D T<sub>1</sub>w inversion prepared RF-spoiled gradient echo scan using prospective motion correction, when available (currently only on Siemens and GE scanners) (5, 6). T<sub>1</sub>w structural images were corrected for gradient nonlinearity distortions using scanner-specific, nonlinear transformations provided by MRI scanner manufacturers (7, 8). Intensity inhomogeneity correction was performed by applying smoothly varying, estimated B<sub>1</sub>-bias fields (9, 10). Images were rigidly registered and resampled into alignment with an averaged in-house reference brain in standard space (1.0 mm isotropic voxels, roughly aligned with the anterior commissure/posterior commissure axis), facilitating standardized viewing and analysis of brain structure.

Cortical surface reconstruction and subcortical segmentation were performed using FreeSurfer v5.3 (11, 12). To ensure high quality of derived measures, trained technicians reviewed the accuracy of cortical surface reconstruction. For each cortical surface reconstruction, reviewers examined the severity of five categories of MRI artifact or reconstruction inaccuracy, including motion, intensity inhomogeneity, white matter underestimation, pial overestimation, and magnetic susceptibility artifact. Quality values were assigned on a scale of 0–3, indicating absent, mild, moderate, or severe levels of each type of artifact, respectively. The reviewers then assigned an overall quality score which indicated whether the cortical surface reconstruction was recommended for use or for exclusion. Exclusion was recommended if any of the five categories were rated as severe.

1  
2  
3 Based on this criteria, 863 participants were excluded from the structural MRI analyses  
4  
5 (n=10,858).  
6  
7

## 9 **Appendix S2. Confirmatory factor analysis**

### 10 *Methods*

11 To delineate the structure of psychopathology in the current sample, three  
12  
13 confirmatory factor analysis (CFA) models were fit: 1) a one factor model with all indicators  
14  
15 loading on a single latent factor representing general psychopathology; 2) a bifactor model  
16  
17 with all indicators of psychopathology loading on a single factor representing general  
18  
19 psychopathology as well as the residual variance from three indicators representing  
20  
21 externalizing (attention deficit hyperactivity disorder, oppositional defiance disorder, conduct  
22  
23 disorder), six indicators representing internalizing (major depressive disorder, generalised  
24  
25 anxiety disorder, panic disorder, separation anxiety disorder, social anxiety disorder, post-  
26  
27 traumatic stress disorder), and four indicators representing thought disorder pathology  
28  
29 (hallucinations, delusions, obsessive-compulsive disorder, bipolar disorder); and 3) a higher-  
30  
31 order model with three lower-order factors representing externalizing, internalizing, and  
32  
33 thought disorder pathology (as described in the bifactor model), and a single higher order  
34  
35 factor representing general psychopathology that accounts for correlations among lower order  
36  
37 factors.  
38  
39  
40  
41  
42  
43

44 All models were estimated using a robust maximum likelihood estimator (MLR) with  
45  
46 numerical integration, suitable for binary indicators, as implemented in MPlus Version 8.4  
47  
48 (13). Models were compared based on the Bayesian Information Criterion (BIC) and the  
49  
50 sample size adjusted Bayesian Information Criterion (ssaBIC), with lower values indicating  
51  
52 better model fit (14). For the specific factors from the bifactor model, OmegaHS coefficients  
53  
54 were derived from the standardized factor loadings (15). OmegaHS indicates whether the  
55  
56 specific factors from the bifactor model reflect reliable variance that is independent from the  
57  
58 general psychopathology factor. The lower-order/specific factors from the higher-order and  
59  
60

1  
2  
3 bifactor factor models, respectively, were compared using the  $H$  coefficient, given recent  
4  
5 simulations demonstrating that model fit statistics like BIC and ssaBIC tend to be biased  
6  
7 towards selection of bifactor models (16). The  $H$  coefficient provides an indication of the  
8  
9 construct replicability (i.e., reliability) of the latent factors with values ranging from 0 to 1  
10  
11 and estimates  $> .8$  indicating well-defined latent variables (Rodriguez et al., 2016). Finally,  
12  
13 the CFA models were re-run using a weighted least squares estimator (WLSMV) to generate  
14  
15 the Comparative Fit Index (CFI), Tucker-Lewis Index (TLI), and the root mean square error  
16  
17 of approximation (RMSEA). Prior empirically derived cut-points were used to determine  
18  
19 close fit (CFI and TLI  $> 0.95$  and RMSEA  $< 0.05$ ) (17). The confirmatory factor analysis  
20  
21 described above was conducted before the study was preregistered (as described here:  
22  
23 <https://osf.io/qxegb>).

### 24 25 26 27 28 *Results*

29  
30 Tetrachoric correlations for all the binary indicators of psychopathology are provided  
31  
32 in Table S1. Confirmatory factor analysis model fit statistics are presented in Table S2. The  
33  
34 bifactor model as specified above had a Heywood case (i.e., negative residual variance) for  
35  
36 the hallucinations indicator, indicating that the model was not valid. Inspection of the results  
37  
38 indicated that the thought disorder factor was subsumed by the general psychopathology  
39  
40 factor: whilst these indicators loaded highly on general psychopathology, they did not form a  
41  
42 separate thought disorder factor independent of the general psychopathology factor. The  
43  
44 bifactor model was then re-specified removing the thought disorder specific factor, with the  
45  
46 fit statistics reported in Table S2 (Model B': modified bifactor model). All three models fit  
47  
48 the data well, with both the higher-order model and the modified bifactor model  
49  
50 outperforming the one factor model. However, the reliability of the specific factors in the  
51  
52 modified bifactor model was low ( $H$  coefficient externalizing = 0.50;  $H$  coefficient  
53  
54 internalizing = 0.53). Whereas reliability was higher and within the acceptable range for the  
55  
56  
57  
58  
59  
60

1  
2  
3 lower order factors in the higher-order model ( $H$  coefficient externalizing: 0.84;  $H$  coefficient  
4 internalizing: 0.91,  $H$  coefficient thought disorder: 0.74). The internalizing specific factor  
5  
6 from the bifactor model had an OmegaHS of 0.22, while externalizing had an OmegaHS of  
7  
8 0.39, indicating that the specific factors provide little unique, reliable variance.  
9  
10  
11  
12  
13

### 14 **Appendix S3. Estimation of Bayesian plausible values**

15  
16  
17 In order to estimate Bayesian plausible values, the SVALUES output option was included in  
18  
19 the final best fitting model estimated using the MLR estimator. The SVALUES option  
20  
21 generates a model command with final estimates used as starting values. The best fitting  
22  
23 model was then re-estimated with the Bayes estimator and included the model command with  
24  
25 final estimates as starting values from the previously estimated measurement model. The data  
26  
27 imputation command was also included, with a total of 100 datasets imputed and saved. Each  
28  
29 of the 100 imputations contained different plausible values for the externalizing,  
30  
31 internalizing, thought disorder and general psychopathology dimensions. The following  
32  
33 analysis example was highly informative as a practical guide for estimating these values:  
34  
35 [https://www.lesahoffman.com/PSYC948/948\\_Example11\\_SEM.pdf](https://www.lesahoffman.com/PSYC948/948_Example11_SEM.pdf). The MPlus code for  
36  
37 generating Bayesian plausible values, including starting values, is appended below.  
38  
39  
40  
41

42 DATA:

43  
44 file is C:\Users\Louise\Desktop\Plausible values\MPLUS\_P.csv;

45  
46 VARIABLE:

47  
48 names are id dep gad pan sep soc hal del adhd odd cd ocd bip ptsd pho;

49  
50 missing are all (-99);

51  
52 usevar are dep gad pan sep soc hal del adhd odd cd ocd bip ptsd pho;

53  
54 categorical are dep gad pan sep soc hal del adhd odd cd ocd bip ptsd pho;

55  
56 idvariable is id;  
57  
58  
59  
60

1  
2  
3 ANALYSIS:  
4

5 ESTIMATOR = bayes;  
6

7 OUTPUT:  
8

9  
10 sampstat standardized SVALUES stdyx tech4;  
11

12 MODEL:  
13

14 ext BY adhd@1;  
15

16 ext BY odd@1.32701;  
17

18 ext BY cd@1.01627;  
19

20 int BY dep@1;  
21

22 int BY gad@1.39546;  
23

24 int BY pan@1.38577;  
25

26 int BY sep@1.01479;  
27

28 int BY soc@0.82062;  
29

30 int BY ptsd@1.26140;  
31

32 int BY pho@0.53321;  
33

34 thought BY hal@1;  
35

36 thought BY del@0.91007;  
37

38 thought BY bip@0.61733;  
39

40 thought BY ocd@1.00597;  
41

42  
43 p BY ext@1;  
44

45 p BY int@1.03844;  
46

47 p BY thought@0.95552;  
48

49  
50 [ dep\$1@5.11928 ];  
51  
52  
53  
54  
55  
56  
57  
58  
59  
60

1  
2  
3 [ gad\$1@5.57037 ];  
4

5 [ pan\$1@9.04455 ];  
6

7 [ sep\$1@3.56520 ];  
8

9 [ soc\$1@4.02689 ];  
10

11 [ hal\$1@6.72447 ];  
12

13 [ del\$1@5.05058 ];  
14

15 [ adhd\$1@2.24855 ];  
16

17 [ odd\$1@3.57903 ];  
18

19 [ cd\$1@5.22437 ];  
20

21 [ ocd\$1@3.24081 ];  
22

23 [ bip\$1@3.75878 ];  
24

25 [ ptsd\$1@6.27217 ];  
26

27 [ pho\$1@1.22046 ];  
28  
29  
30

31  
32  
33  
34  
35 ext@1.74141;  
36

37 int@0.77267;  
38

39 thought@0.37240;  
40

41 p@2.79577;  
42  
43  
44  
45

46  
47 DATA IMPUTATION: ! Creating plausible values for factor score

48  
49 NDATASETS = 100; ! Number of separate values to create

50  
51 SAVE = P\*.sav; ! Name of separate datasets with plausible values  
52  
53  
54  
55

56  
57 SAVEDATA: FILE = P.sav; ! Summary about plausibles per person

58  
59 SAVE = FSCORES (1); ! Needed to generate 100 factor scores  
60

1  
2  
3 FACTORS = ext int thought p; ! Which factors to save  
4  
5

## 6 **References**

- 7  
8 1. Fischl B. FreeSurfer. *Neuroimage*. 2012;62:774-81.  
9  
10 2. Cox RW. AFNI: software for analysis and visualization of functional magnetic  
11 resonance neuroimages. *Comput Biomed Res*. 1996;29(3):162-73.  
12  
13 3. Jenkinson M, Beckmann CF, Behrens TE, Woolrich MW, Smith SM. FSL.  
14 *Neuroimage*. 2012;62(2):782-90.  
15  
16 4. Smith SM, Jenkinson M, Woolrich MW, Beckmann CF, Behrens TE, Johansen-Berg  
17 H, et al. Advances in functional and structural MR image analysis and implementation as  
18 FSL. *Neuroimage*. 2004;23 Suppl 1:S208-19.  
19  
20 5. Tisdall MD, Hess AT, Reuter M, Meintjes EM, Fischl B, van der Kouwe AJ.  
21 Volumetric navigators for prospective motion correction and selective reacquisition in  
22 neuroanatomical MRI. *Magn Reson Med*. 2012;68(2):389-99.  
23  
24 6. White N, Roddey C, Shankaranarayanan A, Han E, Rettmann D, Santos J, et al.  
25 PROMO: Real-time prospective motion correction in MRI using image-based tracking. *Magn*  
26 *Reson Med*. 2010;63(1):91-105.  
27  
28 7. Jovicich J, Czanner S, Greve D, Haley E, van der Kouwe A, Gollub R, et al.  
29 Reliability in multi-site structural MRI studies: effects of gradient non-linearity correction on  
30 phantom and human data. *Neuroimage*. 2006;30(2):436-43.  
31  
32 8. Wald L, Schmitt F, Dale A. Systematic spatial distortion in MRI due to gradient non-  
33 linearities. *Neuroimage*. 2001;13:50.  
34  
35 9. Ashburner J, Friston KJ. Voxel-based morphometry--the methods. *Neuroimage*.  
36 2000;11(6 Pt 1):805-21.  
37  
38 10. Sled JG, Zijdenbos AP, Evans AC. A nonparametric method for automatic correction  
39 of intensity nonuniformity in MRI data. *IEEE Trans Med Imaging*. 1998;17(1):87-97.  
40  
41  
42  
43  
44  
45  
46  
47  
48  
49  
50  
51  
52  
53  
54  
55  
56  
57  
58  
59  
60

- 1  
2  
3 11. Desikan RS, Segonne F, Fischl B, Quinn BT, Dickerson BC, Blacker D, et al. An  
4 automated labeling system for subdividing the human cerebral cortex on MRI scans into  
5 gyral based regions of interest. *Neuroimage*. 2006;31(3):968-80.  
6  
7
- 8  
9  
10 12. Fischl B, Salat DH, Busa E, Albert M, Dieterich M, Haselgrove C, et al. Whole brain  
11 segmentation: automated labeling of neuroanatomical structures in the human brain. *Neuron*.  
12 2002;33(3):341-55.  
13  
14
- 15  
16  
17 13. Muthén L, Muthén B. Mplus. The comprehensive modelling program for applied  
18 researchers: user's guide. 2018;5.  
19
- 20  
21  
22 14. Raftery AE. Bayesian model selection in social research. *Sociological methodology*.  
23 1995:111-63.  
24  
25
- 26  
27  
28 15. Rodriguez A, Reise SP, Haviland MG. Evaluating bifactor models: calculating and  
29 interpreting statistical indices. *Psychological methods*. 2016;21(2):137.  
30
- 31  
32  
33 16. Greene AL, Eaton NR, Li K, Forbes MK, Krueger RF, Markon KE, et al. Are fit  
34 indices used to test psychopathology structure biased? A simulation study. *Journal of*  
35 *abnormal psychology*. 2019;128(7):740.  
36  
37
- 38  
39  
40 17. Hu L-t, Bentler PM. Fit indices in covariance structure modeling: Sensitivity to  
41 underparameterized model misspecification. *Psychological methods*. 1998;3(4):424.  
42  
43  
44  
45  
46  
47  
48  
49  
50  
51  
52  
53  
54  
55  
56  
57  
58  
59  
60



**Figure S1.** Empirical distributions of factor scores and Bayesian plausible values.

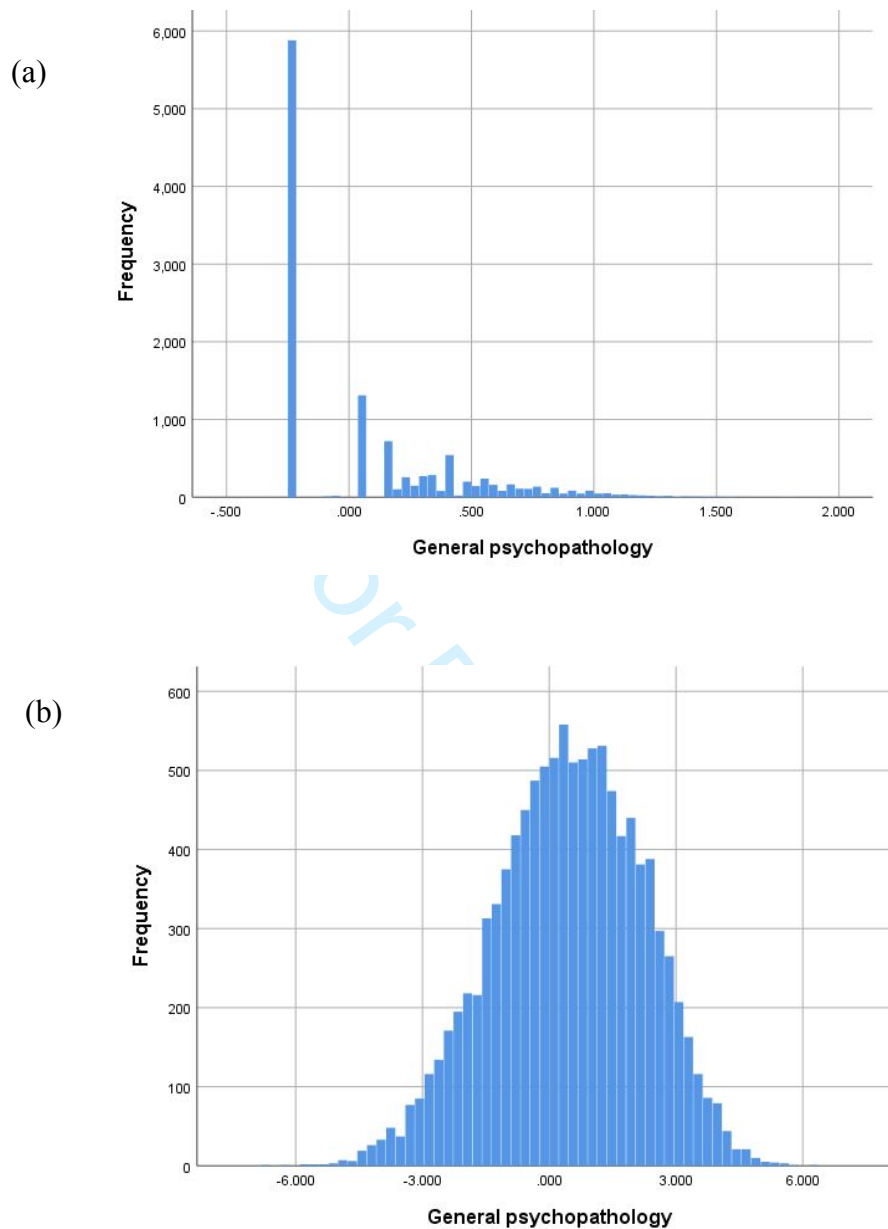

Empirical distributions of factor scores (a; using the WLSMV estimator in MPlus) and the first imputation of Bayesian plausible values (b; using the BAYES estimator in MPlus) for general psychopathology. All participants reporting zero indicators have the same factor score, resulting in a distribution that is positively skewed in general population samples. As plausible values are random draws from the participant's posterior distribution, those reporting the same pattern of indicators have a range of different plausible values, resulting in a smooth, normal distribution of general psychopathology.

**Table S1.** Comparison of baseline demographic and clinical characteristics of the participants included and excluded from the structural imaging analyses

|                                   | High quality structural MRI data (n=10,858) |          | Low quality structural MRI data (n = 863) |          | <i>p</i> |
|-----------------------------------|---------------------------------------------|----------|-------------------------------------------|----------|----------|
|                                   | Mean                                        | SD       | Mean                                      | SD       |          |
| <b>Total cognition score</b>      | 47.8                                        | 11.2     | 46.4                                      | 11.6     | <.001    |
| <b>Parental education (years)</b> | 16.63                                       | 2.7      | 16.29                                     | 3.1      | .001     |
|                                   | <b>N</b>                                    | <b>%</b> | <b>N</b>                                  | <b>%</b> |          |
| <b>Male</b>                       | 5,665                                       | 52.2     | 453                                       | 52.5     | .845     |
| <b>Race/ethnicity</b>             |                                             |          |                                           |          |          |
| Caucasian                         | 5732                                        | 52.8     | 376                                       | 43.7     | <.001    |
| Black                             | 1581                                        | 14.6     | 172                                       | 20.0     |          |
| Hispanic                          | 2187                                        | 20.1     | 173                                       | 20.1     |          |
| Asian                             | 222                                         | 2.0      | 28                                        | 3.3      |          |
| Other                             | 1119                                        | 10.3     | 111                                       | 12.9     |          |
| <b>Lifetime disorders</b>         |                                             |          |                                           |          |          |
| Major Depressive Disorder         | 301                                         | 2.8      | 17                                        | 2.0      | .163     |
| Generalised Anxiety Disorder      | 479                                         | 4.4      | 31                                        | 3.6      | .257     |
| Panic Disorder                    | 29                                          | 0.3      | 3                                         | 0.3      | .657     |
| Separation Anxiety                | 965                                         | 8.9      | 84                                        | 9.7      | .401     |
| Social Anxiety Disorder           | 509                                         | 4.7      | 38                                        | 4.4      | .704     |
| Hallucinations                    | 52                                          | 0.5      | 3                                         | 0.3      | .587     |
| Delusions                         | 204                                         | 1.9      | 12                                        | 1.4      | .305     |
| Attention Deficit Hyperactivity   | 2192                                        | 20.2     | 237                                       | 27.5     | <.001    |
| Oppositional Defiant Disorder     | 1536                                        | 14.1     | 131                                       | 15.2     | .374     |
| Conduct Disorder                  | 341                                         | 3.1      | 33                                        | 3.8      | .261     |
| Obsessive-Compulsive Disorder     | 1006                                        | 9.3      | 93                                        | 10.8     | .131     |
| Bipolar Disorder                  | 389                                         | 3.6      | 40                                        | 4.6      | .113     |
| Post-Traumatic Stress Disorder    | 209                                         | 1.9      | 22                                        | 2.5      | .197     |
| Specific Phobia                   | 2893                                        | 26.6     | 240                                       | 27.8     | .408     |

**Note:** Cognition scores ascertained from fully corrected total cognition t-score from the NIH toolbox

**Table S2.** Tetrachoric correlation matrix for indicators of psychopathology in the ABCD study (n=11,721)

|      | ADHD  | ODD   | CD    | MDD   | GAD   | PAN   | SEP   | SOC   | PTSD  | PHO   | HAL   | DEL   | OCD   | BIP   |
|------|-------|-------|-------|-------|-------|-------|-------|-------|-------|-------|-------|-------|-------|-------|
| ADHD | 1.000 | -     | -     | -     | -     | -     | -     | -     | -     | -     | -     | -     | -     | -     |
| ODD  | 0.652 | 1.000 | -     | -     | -     | -     | -     | -     | -     | -     | -     | -     | -     | -     |
| CD   | 0.558 | 0.618 | 1.000 | -     | -     | -     | -     | -     | -     | -     | -     | -     | -     | -     |
| MDD  | 0.360 | 0.380 | 0.323 | 1.000 | -     | -     | -     | -     | -     | -     | -     | -     | -     | -     |
| GAD  | 0.418 | 0.201 | 0.364 | 0.542 | 1.000 | -     | -     | -     | -     | -     | -     | -     | -     | -     |
| PAN  | 0.189 | 0.395 | 0.106 | 0.561 | 0.556 | 1.000 | -     | -     | -     | -     | -     | -     | -     | -     |
| SEP  | 0.329 | 0.429 | 0.293 | 0.461 | 0.574 | 0.526 | 1.000 | -     | -     | -     | -     | -     | -     | -     |
| SOC  | 0.341 | 0.341 | 0.135 | 0.425 | 0.538 | 0.452 | 0.493 | 1.000 | -     | -     | -     | -     | -     | -     |
| PTSD | 0.441 | 0.495 | 0.420 | 0.455 | 0.564 | 0.533 | 0.575 | 0.351 | 1.000 | -     | -     | -     | -     | -     |
| PHO  | 0.309 | 0.187 | 0.187 | 0.327 | 0.387 | 0.325 | 0.405 | 0.325 | 0.334 | 1.000 | -     | -     | -     | -     |
| HAL  | 0.317 | 0.199 | 0.257 | 0.250 | 0.334 | 0.257 | 0.315 | 0.078 | 0.367 | 0.205 | 1.000 | -     | -     | -     |
| DEL  | 0.292 | 0.302 | 0.397 | 0.361 | 0.354 | 0.371 | 0.347 | 0.226 | 0.282 | 0.192 | 0.501 | 1.000 | -     | -     |
| OCD  | 0.405 | 0.349 | 0.353 | 0.398 | 0.469 | 0.428 | 0.381 | 0.312 | 0.438 | 0.310 | 0.431 | 0.346 | 1.000 | -     |
| BIP  | 0.352 | 0.288 | 0.276 | 0.228 | 0.194 | 0.085 | 0.189 | 0.119 | 0.273 | 0.179 | 0.162 | 0.200 | 0.288 | 1.000 |

**Note:** ADHD=attention deficit hyperactivity disorder, ODD=oppositional defiant disorder, CD=conduct disorder, MDD=major depressive disorder, GAD=generalized anxiety disorder, PAN=panic disorder, SEP=separation anxiety disorder, SOC=social anxiety disorder, PTSD=post-traumatic stress disorder, PHO=specific phobia, HAL=hallucinations, DEL=delusions, OCD=obsessive-compulsive disorder, BIP=bipolar disorder.

**Table S3.** Model fit statistics for CFA

| <b>Model</b>                              | <b>RMSEA</b> | <b>CFI</b> | <b>TLI</b> | <b>BIC</b> | <b>ssaBIC</b> |
|-------------------------------------------|--------------|------------|------------|------------|---------------|
| <b>Model A – one factor model</b>         | 0.028        | 0.947      | 0.937      | 67020.6    | 66931.6       |
| <b>Model B' – modified bifactor model</b> | 0.013        | 0.990      | 0.987      | 66518.4    | 66397.6       |
| <b>Model C – hierarchical model</b>       | 0.014        | 0.987      | 0.984      | 66500.6    | 66402.1       |

For Peer Review

**Table S4.** The relationship between cortical volume and psychopathology in the ABCD Study (n=10,858)

|                        |   | Externalizing |       |       |             | Internalizing |       |       |             | Thought Disorder |       |       |             | General Psychopathology |       |       |             |
|------------------------|---|---------------|-------|-------|-------------|---------------|-------|-------|-------------|------------------|-------|-------|-------------|-------------------------|-------|-------|-------------|
|                        |   | B             | SE    | t     | p(FDR)      | B             | SE    | t     | p(FDR)      | B                | SE    | t     | p(FDR)      | B                       | SE    | t     | p(FDR)      |
| <b>Cortical</b>        |   |               |       |       |             |               |       |       |             |                  |       |       |             |                         |       |       |             |
| <b>Frontal</b>         |   |               |       |       |             |               |       |       |             |                  |       |       |             |                         |       |       |             |
| Caudal anterior        | L | -7.40         | 3.27  | -2.27 | <b>.035</b> | -5.99         | 3.40  | -1.76 | .091        | -7.02            | 3.90  | -1.80 | .085        | -7.68                   | 4.07  | -1.89 | .074        |
| cingulate              | R | -11.25        | 3.32  | -3.39 | <b>.003</b> | -8.56         | 3.45  | -2.48 | <b>.021</b> | -11.03           | 3.95  | -2.79 | <b>.012</b> | -11.60                  | 4.01  | -2.89 | <b>.010</b> |
| Caudal middle frontal  | L | -15.03        | 8.03  | -1.87 | .076        | -13.60        | 8.15  | -1.67 | .105        | -16.28           | 9.23  | -1.76 | .091        | -17.16                  | 9.53  | -1.80 | .085        |
|                        | R | -23.88        | 8.21  | -2.91 | <b>.009</b> | -22.53        | 8.66  | -2.60 | <b>.018</b> | -25.43           | 9.46  | -2.69 | <b>.015</b> | -27.74                  | 9.91  | -2.80 | <b>.012</b> |
| Lateral orbitofrontal  | L | -20.87        | 4.95  | -4.21 | <b>.002</b> | -16.55        | 5.32  | -3.11 | <b>.006</b> | -21.24           | 5.92  | -3.59 | <b>.002</b> | -22.46                  | 6.23  | -3.60 | <b>.002</b> |
|                        | R | -22.69        | 5.23  | -4.34 | <b>.002</b> | -18.88        | 5.47  | -3.45 | <b>.003</b> | -23.03           | 6.19  | -3.72 | <b>.002</b> | -24.72                  | 6.45  | -3.83 | <b>.002</b> |
| Medial orbitofrontal   | L | -9.97         | 4.10  | -2.43 | <b>.024</b> | -9.36         | 4.34  | -2.16 | <b>.044</b> | -10.10           | 4.78  | -2.11 | <b>.048</b> | -11.16                  | 5.08  | -2.20 | <b>.040</b> |
|                        | R | -11.35        | 3.90  | -2.91 | <b>.009</b> | -10.03        | 3.98  | -2.52 | <b>.020</b> | -12.05           | 4.51  | -2.67 | <b>.016</b> | -12.94                  | 4.70  | -2.75 | <b>.013</b> |
| Paracentral            | L | -9.61         | 3.79  | -2.54 | <b>.020</b> | -9.89         | 3.87  | -2.56 | <b>.019</b> | -11.09           | 4.44  | -2.50 | <b>.020</b> | -11.95                  | 4.52  | -2.64 | <b>.016</b> |
|                        | R | -12.68        | 4.27  | -2.97 | <b>.008</b> | -12.26        | 4.52  | -2.71 | <b>.014</b> | -14.03           | 5.01  | -2.80 | <b>.012</b> | -15.03                  | 5.23  | -2.87 | <b>.010</b> |
| Pars opercularis       | L | -10.09        | 5.45  | -1.85 | .078        | -10.77        | 5.55  | -1.94 | .068        | -12.32           | 6.28  | -1.96 | .065        | -13.29                  | 6.55  | -2.03 | .056        |
|                        | R | -12.10        | 4.62  | -2.62 | <b>.017</b> | -10.63        | 4.74  | -2.25 | <b>.036</b> | -13.40           | 5.29  | -2.53 | <b>.020</b> | -13.97                  | 5.52  | -2.53 | <b>.020</b> |
| Pars orbitalis         | L | -5.13         | 1.96  | -2.62 | <b>.017</b> | -4.66         | 2.03  | -2.30 | <b>.033</b> | -5.41            | 2.29  | -2.37 | <b>.028</b> | -5.83                   | 2.39  | -2.44 | <b>.024</b> |
|                        | R | -7.40         | 2.44  | -3.03 | <b>.007</b> | -6.75         | 2.46  | -2.75 | <b>.013</b> | -8.51            | 2.72  | -3.12 | <b>.006</b> | -8.87                   | 2.84  | -3.12 | <b>.006</b> |
| Pars triangularis      | L | -10.98        | 4.00  | -2.75 | <b>.013</b> | -8.94         | 4.20  | -2.13 | <b>.047</b> | -10.54           | 4.80  | -2.20 | <b>.040</b> | -11.44                  | 4.93  | -2.32 | <b>.031</b> |
|                        | R | -10.24        | 4.98  | -2.06 | .054        | -8.95         | 5.17  | -1.73 | .096        | -11.08           | 5.64  | -1.97 | .065        | -11.62                  | 6.00  | -1.94 | .068        |
| Precentral             | L | -31.01        | 9.50  | -3.26 | <b>.004</b> | -23.56        | 9.82  | -2.40 | <b>.026</b> | -28.16           | 11.34 | -2.48 | <b>.021</b> | -30.56                  | 11.42 | -2.68 | <b>.015</b> |
|                        | R | -35.55        | 9.05  | -3.93 | <b>.002</b> | -31.48        | 9.28  | -3.39 | <b>.003</b> | -37.53           | 10.62 | -3.53 | <b>.002</b> | -40.04                  | 10.97 | -3.65 | <b>.002</b> |
| Rostral anterior       | L | -8.52         | 3.00  | -2.84 | <b>.011</b> | -7.41         | 3.14  | -2.36 | <b>.028</b> | -8.21            | 3.58  | -2.29 | <b>.033</b> | -9.10                   | 3.62  | -2.51 | <b>.020</b> |
| cingulate              | R | -7.95         | 2.71  | -2.93 | <b>.009</b> | -6.19         | 2.91  | -2.13 | <b>.047</b> | -8.02            | 3.20  | -2.50 | <b>.020</b> | -8.51                   | 3.35  | -2.54 | <b>.020</b> |
| Rostral middle frontal | L | -57.34        | 13.20 | -4.34 | <b>.002</b> | -47.45        | 13.29 | -3.57 | <b>.002</b> | -57.23           | 15.03 | -3.81 | <b>.002</b> | -61.55                  | 15.85 | -3.88 | <b>.002</b> |
|                        | R | -39.21        | 12.92 | -3.04 | <b>.007</b> | -27.04        | 13.42 | -2.01 | .058        | -31.33           | 14.77 | -2.12 | <b>.047</b> | -35.56                  | 15.31 | -2.32 | <b>.031</b> |
| Superior frontal       | L | -61.22        | 15.18 | -4.03 | <b>.002</b> | -55.03        | 15.65 | -3.52 | <b>.003</b> | -64.27           | 17.59 | -3.65 | <b>.002</b> | -69.33                  | 18.34 | -3.78 | <b>.002</b> |
|                        | R | -56.11        | 15.41 | -3.64 | <b>.002</b> | -58.29        | 15.80 | -3.69 | <b>.002</b> | -64.38           | 17.88 | -3.60 | <b>.002</b> | -69.53                  | 18.60 | -3.74 | <b>.002</b> |
| Frontal pole           | L | -1.40         | 0.97  | -1.44 | .158        | -2.10         | 1.02  | -2.06 | .054        | -1.99            | 1.16  | -1.71 | .099        | -2.22                   | 1.20  | -1.85 | .078        |
|                        | R | -3.26         | 1.23  | -2.64 | <b>.016</b> | -2.57         | 1.32  | -1.94 | .068        | -2.75            | 1.47  | -1.87 | .076        | -3.20                   | 1.52  | -2.11 | <b>.048</b> |
| <b>Parietal</b>        |   |               |       |       |             |               |       |       |             |                  |       |       |             |                         |       |       |             |
| Inferior parietal      | L | -46.43        | 11.66 | -3.98 | <b>.002</b> | -40.65        | 11.90 | -3.42 | <b>.003</b> | -46.71           | 13.17 | -3.55 | <b>.002</b> | -50.75                  | 13.81 | -3.67 | <b>.002</b> |
|                        | R | -45.59        | 13.63 | -3.34 | <b>.004</b> | -38.39        | 13.44 | -2.86 | <b>.010</b> | -47.94           | 15.04 | -3.19 | <b>.005</b> | -49.94                  | 15.74 | -3.17 | <b>.005</b> |
| Isthmus cingulate      | L | -9.43         | 3.15  | -2.99 | <b>.008</b> | -7.04         | 3.32  | -2.12 | <b>.047</b> | -8.67            | 3.82  | -2.27 | <b>.035</b> | -9.51                   | 3.92  | -2.42 | <b>.025</b> |
|                        | R | -5.21         | 2.91  | -1.79 | .087        | -5.06         | 3.07  | -1.65 | .109        | -6.58            | 3.55  | -1.86 | .078        | -6.69                   | 3.63  | -1.84 | .079        |
| Postcentral            | L | -32.52        | 9.00  | -3.61 | <b>.002</b> | -29.52        | 9.50  | -3.11 | <b>.006</b> | -33.28           | 10.70 | -3.11 | <b>.006</b> | -36.55                  | 11.01 | -3.32 | <b>.004</b> |
|                        | R | -30.45        | 8.41  | -3.62 | <b>.002</b> | -26.10        | 9.05  | -2.89 | <b>.010</b> | -30.92           | 9.93  | -3.11 | <b>.006</b> | -33.47                  | 10.38 | -3.22 | <b>.005</b> |

1  
2  
3  
4  
5  
6  
7  
8  
9  
10  
11  
12  
13  
14  
15  
16  
17  
18  
19  
20  
21  
22  
23  
24  
25  
26  
27  
28  
29  
30  
31  
32  
33  
34  
35  
36  
37  
38  
39  
40  
41  
42  
43  
44  
45  
46

|                                   |   | Externalizing |       |       |             | Internalizing |       |       |             | Thought Disorder |       |       |             | General Psychopathology |       |       |             |
|-----------------------------------|---|---------------|-------|-------|-------------|---------------|-------|-------|-------------|------------------|-------|-------|-------------|-------------------------|-------|-------|-------------|
|                                   |   | B             | SE    | t     | p(FDR)      | B             | SE    | t     | p(FDR)      | B                | SE    | t     | p(FDR)      | B                       | SE    | t     | p(FDR)      |
| <b>Cortical</b>                   |   |               |       |       |             |               |       |       |             |                  |       |       |             |                         |       |       |             |
| Posterior cingulate               | L | -12.24        | 3.40  | -3.60 | <b>.002</b> | -12.21        | 3.52  | -3.47 | <b>.003</b> | -14.23           | 4.00  | -3.56 | <b>.002</b> | -15.08                  | 4.13  | -3.65 | <b>.002</b> |
|                                   | R | -11.63        | 3.66  | -3.18 | <b>.005</b> | -9.31         | 3.91  | -2.38 | <b>.027</b> | -11.36           | 4.52  | -2.51 | <b>.020</b> | -12.20                  | 4.62  | -2.64 | <b>.016</b> |
| Precuneus                         | L | -32.00        | 8.17  | -3.92 | <b>.002</b> | -27.38        | 8.20  | -3.34 | <b>.004</b> | -32.07           | 9.20  | -3.49 | <b>.003</b> | -34.92                  | 9.77  | -3.58 | <b>.002</b> |
|                                   | R | -31.01        | 8.39  | -3.70 | <b>.002</b> | -29.52        | 8.52  | -3.47 | <b>.003</b> | -32.87           | 9.65  | -3.41 | <b>.003</b> | -35.96                  | 9.99  | -3.60 | <b>.002</b> |
| Superior parietal                 | L | -30.37        | 10.78 | -2.82 | <b>.011</b> | -27.87        | 11.03 | -2.53 | <b>.020</b> | -32.11           | 12.39 | -2.59 | <b>.018</b> | -34.59                  | 12.82 | -2.70 | <b>.015</b> |
|                                   | R | -31.12        | 11.04 | -2.82 | <b>.011</b> | -31.55        | 11.31 | -2.79 | <b>.012</b> | -35.89           | 12.61 | -2.85 | <b>.011</b> | -38.32                  | 13.02 | -2.94 | <b>.009</b> |
| Supramarginal                     | L | -37.19        | 10.83 | -3.43 | <b>.003</b> | -32.90        | 10.91 | -3.02 | <b>.007</b> | -39.25           | 12.50 | -3.14 | <b>.006</b> | -41.98                  | 13.27 | -3.16 | <b>.005</b> |
|                                   | R | -42.66        | 10.02 | -4.26 | <b>.002</b> | -35.22        | 10.54 | -3.34 | <b>.004</b> | -43.35           | 12.40 | -3.50 | <b>.003</b> | -46.58                  | 12.97 | -3.59 | <b>.002</b> |
| <b>Temporal</b>                   |   |               |       |       |             |               |       |       |             |                  |       |       |             |                         |       |       |             |
| Banks of superior temporal sulcus | L | -5.39         | 3.26  | -1.65 | .109        | -3.58         | 3.21  | -1.12 | .270        | -3.95            | 3.60  | -1.10 | .278        | -4.54                   | 3.72  | -1.22 | .228        |
|                                   | R | -4.96         | 2.68  | -1.85 | .078        | -2.83         | 2.79  | -1.02 | .315        | -4.43            | 3.13  | -1.42 | .164        | -4.48                   | 3.24  | -1.38 | .173        |
| Entorhinal                        | L | -5.23         | 2.03  | -2.57 | <b>.018</b> | -5.28         | 2.10  | -2.52 | <b>.020</b> | -5.95            | 2.35  | -2.54 | <b>.020</b> | -6.31                   | 2.44  | -2.59 | <b>.018</b> |
|                                   | R | -4.30         | 2.11  | -2.04 | .056        | -3.50         | 2.11  | -1.66 | .107        | -4.29            | 2.48  | -1.73 | .096        | -4.61                   | 2.62  | -1.76 | .092        |
| Fusiform                          | L | -27.35        | 8.48  | -3.22 | <b>.005</b> | -19.89        | 8.74  | -2.28 | <b>.034</b> | -25.17           | 9.85  | -2.55 | <b>.019</b> | -26.97                  | 10.20 | -2.64 | <b>.016</b> |
|                                   | R | -28.80        | 7.90  | -3.65 | <b>.002</b> | -23.21        | 8.06  | -2.88 | <b>.010</b> | -28.03           | 9.01  | -3.11 | <b>.006</b> | -29.95                  | 9.40  | -3.19 | <b>.005</b> |
| Inferior temporal                 | L | -34.63        | 10.07 | -3.44 | <b>.003</b> | -27.84        | 10.58 | -2.63 | <b>.017</b> | -32.85           | 11.83 | -2.78 | <b>.012</b> | -35.81                  | 12.23 | -2.93 | <b>.009</b> |
|                                   | R | -35.77        | 9.14  | -3.91 | <b>.002</b> | -28.75        | 10.02 | -2.87 | <b>.010</b> | -30.08           | 11.40 | -2.64 | <b>.016</b> | -34.71                  | 11.58 | -3.00 | <b>.008</b> |
| Middle temporal                   | L | -31.68        | 9.06  | -3.50 | <b>.003</b> | -27.18        | 9.24  | -2.94 | <b>.009</b> | -32.07           | 10.29 | -3.12 | <b>.006</b> | -34.20                  | 10.59 | -3.23 | <b>.005</b> |
|                                   | R | -37.41        | 9.39  | -3.98 | <b>.002</b> | -31.56        | 9.97  | -3.17 | <b>.005</b> | -38.52           | 10.51 | -3.67 | <b>.002</b> | -40.84                  | 11.23 | -3.64 | <b>.002</b> |
| Parahippocampal                   | L | -6.38         | 2.32  | -2.75 | <b>.013</b> | -5.02         | 2.39  | -2.10 | <b>.049</b> | -6.13            | 2.72  | -2.25 | <b>.036</b> | -6.49                   | 2.81  | -2.31 | <b>.032</b> |
|                                   | R | -3.89         | 2.32  | -1.67 | .105        | -3.14         | 2.27  | -1.38 | .173        | -4.89            | 2.64  | -1.86 | .078        | -4.60                   | 2.72  | -1.69 | .102        |
| Superior temporal                 | L | -30.48        | 9.07  | -3.36 | <b>.003</b> | -27.63        | 9.51  | -2.90 | <b>.009</b> | -31.24           | 10.68 | -2.93 | <b>.009</b> | -34.04                  | 10.77 | -3.16 | <b>.005</b> |
|                                   | R | -27.60        | 7.93  | -3.48 | <b>.003</b> | -25.87        | 8.43  | -3.07 | <b>.006</b> | -30.15           | 9.58  | -3.15 | <b>.006</b> | -32.38                  | 9.80  | -3.30 | <b>.004</b> |
| Temporal pole                     | L | -4.90         | 1.94  | -2.52 | <b>.020</b> | -5.41         | 2.10  | -2.58 | <b>.018</b> | -6.04            | 2.28  | -2.64 | <b>.016</b> | -6.48                   | 2.35  | -2.76 | <b>.013</b> |
|                                   | R | -0.70         | 1.89  | -0.37 | .712        | -0.77         | 1.99  | -0.39 | .700        | -0.98            | 2.22  | -0.44 | .665        | -0.95                   | 2.25  | -0.42 | .679        |
| Transverse temporal               | L | -2.64         | 1.45  | -1.83 | .081        | -2.52         | 1.41  | -1.78 | .088        | -2.50            | 1.62  | -1.54 | .132        | -2.92                   | 1.71  | -1.71 | .099        |
|                                   | R | -2.41         | 1.13  | -2.14 | <b>.046</b> | -2.97         | 1.15  | -2.58 | <b>.018</b> | -3.21            | 1.30  | -2.47 | <b>.022</b> | -3.46                   | 1.36  | -2.55 | <b>.020</b> |
| <b>Occipital</b>                  |   |               |       |       |             |               |       |       |             |                  |       |       |             |                         |       |       |             |
| Cuneus                            | L | -5.18         | 2.99  | -1.73 | .096        | -4.83         | 3.09  | -1.57 | .126        | -5.17            | 3.55  | -1.46 | .153        | -5.82                   | 3.66  | -1.59 | .121        |
|                                   | R | -6.39         | 3.31  | -1.93 | .068        | -5.24         | 3.51  | -1.49 | .144        | -5.49            | 3.99  | -1.38 | .174        | -6.36                   | 4.18  | -1.52 | .136        |
| Lateral occipital                 | L | -28.60        | 9.15  | -3.13 | <b>.006</b> | -24.71        | 9.54  | -2.59 | <b>.018</b> | -29.69           | 10.95 | -2.71 | <b>.014</b> | -31.94                  | 11.24 | -2.84 | <b>.011</b> |
|                                   | R | -34.20        | 9.38  | -3.64 | <b>.002</b> | -28.84        | 9.64  | -2.99 | <b>.008</b> | -35.55           | 11.15 | -3.19 | <b>.005</b> | -37.33                  | 11.49 | -3.25 | <b>.005</b> |
| Lingual                           | L | -10.57        | 6.19  | -1.71 | .099        | -9.21         | 6.43  | -1.43 | .159        | -11.66           | 7.31  | -1.59 | .120        | -12.13                  | 7.54  | -1.61 | .118        |
|                                   | R | -13.83        | 6.02  | -2.30 | <b>.033</b> | -11.32        | 6.22  | -1.82 | .082        | -14.69           | 7.23  | -2.03 | .056        | -15.46                  | 7.32  | -2.11 | <b>.048</b> |
| Pericalcarine                     | L | -3.83         | 2.25  | -1.70 | .100        | -4.43         | 2.33  | -1.91 | .071        | -5.09            | 2.64  | -1.93 | .068        | -5.40                   | 2.76  | -1.95 | .066        |

|                    |   | Externalizing |       |       |             | Internalizing |       |       |             | Thought Disorder |       |       |             | General Psychopathology |       |       |             |
|--------------------|---|---------------|-------|-------|-------------|---------------|-------|-------|-------------|------------------|-------|-------|-------------|-------------------------|-------|-------|-------------|
|                    |   | B             | SE    | t     | p(FDR)      | B             | SE    | t     | p(FDR)      | B                | SE    | t     | p(FDR)      | B                       | SE    | t     | p(FDR)      |
| <b>Cortical</b>    |   |               |       |       |             |               |       |       |             |                  |       |       |             |                         |       |       |             |
|                    | R | -4.76         | 2.34  | -2.03 | .056        | -3.92         | 2.47  | -1.59 | .121        | -5.38            | 2.75  | -1.95 | .066        | -5.55                   | 2.92  | -1.90 | .073        |
| Insula             | L | -16.23        | 4.10  | -3.96 | <b>.002</b> | -16.26        | 4.25  | -3.83 | <b>.002</b> | -18.64           | 4.76  | -3.92 | <b>.002</b> | -19.85                  | 4.95  | -4.01 | <b>.002</b> |
|                    | R | -15.80        | 4.20  | -3.76 | <b>.002</b> | -15.19        | 4.36  | -3.48 | <b>.003</b> | -19.15           | 4.81  | -3.98 | <b>.002</b> | -19.53                  | 5.12  | -3.82 | <b>.002</b> |
| <b>Subcortical</b> |   |               |       |       |             |               |       |       |             |                  |       |       |             |                         |       |       |             |
| Cerebellum         | L | -48.51        | 24.06 | -2.02 | .100        | -26.13        | 24.94 | -1.05 | .305        | -45.34           | 28.72 | -1.58 | .171        | -44.97                  | 29.50 | -1.52 | .178        |
|                    | R | -47.33        | 24.86 | -1.90 | .111        | -23.79        | 25.53 | -0.93 | .352        | -41.21           | 29.21 | -1.41 | .195        | -41.43                  | 29.80 | -1.39 | .199        |
| Thalamus           | L | -11.42        | 3.42  | -3.34 | <b>.016</b> | -8.89         | 3.65  | -2.43 | .060        | -10.73           | 4.11  | -2.61 | <b>.047</b> | -11.70                  | 4.18  | -2.80 | <b>.047</b> |
|                    | R | -7.82         | 3.26  | -2.40 | .060        | -6.90         | 3.45  | -2.00 | .100        | -8.34            | 3.85  | -2.17 | .078        | -8.90                   | 3.97  | -2.24 | .070        |
| Caudate            | L | -5.96         | 2.72  | -2.19 | .076        | -4.05         | 2.83  | -1.43 | .191        | -5.07            | 3.28  | -1.55 | .178        | -5.51                   | 3.42  | -1.61 | .168        |
|                    | R | -6.66         | 2.80  | -2.37 | .060        | -4.86         | 2.88  | -1.69 | .147        | -5.65            | 3.29  | -1.72 | .142        | -6.23                   | 3.46  | -1.80 | .124        |
| Putamen            | L | -5.11         | 3.38  | -1.51 | .178        | -4.34         | 3.59  | -1.21 | .250        | -6.17            | 4.02  | -1.54 | .178        | -6.15                   | 4.20  | -1.46 | .184        |
|                    | R | -4.69         | 2.97  | -1.58 | .171        | -4.17         | 3.15  | -1.32 | .216        | -5.27            | 3.54  | -1.49 | .178        | -5.51                   | 3.69  | -1.49 | .178        |
| Pallidum           | L | -2.17         | 1.26  | -1.72 | .142        | -1.66         | 1.26  | -1.31 | .216        | -1.74            | 1.48  | -1.18 | .252        | -2.03                   | 1.52  | -1.33 | .216        |
|                    | R | -1.15         | 0.98  | -1.18 | .252        | -1.02         | 1.01  | -1.01 | .317        | -1.46            | 1.15  | -1.27 | .230        | -1.44                   | 1.21  | -1.19 | .252        |
| Hippocampus        | L | -5.98         | 2.06  | -2.90 | <b>.041</b> | -5.32         | 2.15  | -2.48 | .057        | -5.90            | 2.47  | -2.39 | .060        | -6.44                   | 2.49  | -2.59 | <b>.047</b> |
|                    | R | -6.56         | 1.94  | -3.37 | <b>.016</b> | -7.04         | 2.12  | -3.32 | <b>.016</b> | -7.40            | 2.38  | -3.10 | <b>.025</b> | -8.04                   | 2.44  | -3.30 | <b>.016</b> |
| Amygdala           | L | -2.03         | 1.04  | -1.96 | .104        | -2.27         | 1.11  | -2.05 | .097        | -2.26            | 1.22  | -1.85 | .120        | -2.46                   | 1.27  | -1.95 | .104        |
|                    | R | -2.74         | 1.05  | -2.61 | <b>.047</b> | -2.89         | 1.09  | -2.65 | <b>.047</b> | -2.90            | 1.25  | -2.33 | .064        | -3.26                   | 1.27  | -2.57 | <b>.047</b> |
| Accumbens          | L | -1.47         | 0.55  | -2.69 | <b>.047</b> | -1.04         | 0.57  | -1.83 | .120        | -1.19            | 0.65  | -1.83 | .120        | -1.34                   | 0.67  | -1.99 | .100        |
|                    | R | -1.34         | 0.50  | -2.69 | <b>.047</b> | -1.14         | 0.50  | -2.27 | .068        | -1.17            | 0.57  | -2.07 | .095        | -1.35                   | 0.58  | -2.31 | .064        |

**Table S5.** The relationship between surface area and psychopathology in the ABCD Study (n=10,858)

|                        |   | Externalizing |      |       |                         | Internalizing |      |       |                 | Thought Disorder |      |       |             | General Psychopathology |      |       |                 |
|------------------------|---|---------------|------|-------|-------------------------|---------------|------|-------|-----------------|------------------|------|-------|-------------|-------------------------|------|-------|-----------------|
|                        |   | B             | SE   | t     | p(FDR)                  | B             | SE   | t     | p(FDR)          | B                | SE   | t     | p(FDR)      | B                       | SE   | t     | p(FDR)          |
| <b>Frontal</b>         |   |               |      |       |                         |               |      |       |                 |                  |      |       |             |                         |      |       |                 |
| Caudal anterior        | L | -2.25         | 0.88 | -2.56 | <b>.016</b>             | -1.83         | 0.89 | -2.07 | <b>.048</b>     | -2.16            | 1.03 | -2.11 | <b>.044</b> | -2.36                   | 1.06 | -2.21 | <b>.035</b>     |
| cingulate              | R | -3.35         | 0.90 | -3.73 | <b>.001</b>             | -2.56         | 0.96 | -2.66 | <b>.013</b>     | -3.28            | 1.08 | -3.03 | <b>.006</b> | -3.47                   | 1.11 | -3.13 | <b>.005</b>     |
| Caudal middle frontal  | L | -5.98         | 2.33 | -2.57 | <b>.016<sup>b</sup></b> | -5.12         | 2.35 | -2.18 | <b>.038</b>     | -6.06            | 2.68 | -2.26 | <b>.032</b> | -6.51                   | 2.78 | -2.34 | <b>.027</b>     |
|                        | R | -7.12         | 2.38 | -2.99 | <b>.006</b>             | -6.66         | 2.55 | -2.61 | <b>.014</b>     | -7.38            | 2.85 | -2.59 | <b>.015</b> | -8.12                   | 2.96 | -2.74 | <b>.011</b>     |
| Lateral orbitofrontal  | L | -5.93         | 1.51 | -3.94 | <b>.001</b>             | -4.44         | 1.62 | -2.74 | <b>.011</b>     | -5.80            | 1.80 | -3.23 | <b>.004</b> | -6.14                   | 1.88 | -3.26 | <b>.004</b>     |
|                        | R | -6.17         | 1.61 | -3.83 | <b>.001</b>             | -4.86         | 1.69 | -2.87 | <b>.008</b>     | -6.06            | 1.92 | -3.15 | <b>.005</b> | -6.52                   | 1.98 | -3.29 | <b>.003</b>     |
| Medial orbitofrontal   | L | -3.28         | 1.30 | -2.53 | <b>.017</b>             | -2.87         | 1.32 | -2.17 | <b>.038</b>     | -3.34            | 1.53 | -2.18 | <b>.037</b> | -3.62                   | 1.59 | -2.28 | <b>.031</b>     |
|                        | R | -3.81         | 1.11 | -3.45 | <b>.002</b>             | -3.19         | 1.13 | -2.83 | <b>.009</b>     | -3.90            | 1.31 | -2.98 | <b>.007</b> | -4.18                   | 1.34 | -3.12 | <b>.005</b>     |
| Paracentral            | L | -2.74         | 1.11 | -2.46 | <b>.020</b>             | -2.85         | 1.12 | -2.54 | <b>.017</b>     | -3.21            | 1.29 | -2.49 | <b>.018</b> | -3.45                   | 1.31 | -2.62 | <b>.014</b>     |
|                        | R | -3.93         | 1.30 | -3.01 | <b>.006</b>             | -3.66         | 1.36 | -2.69 | <b>.012</b>     | -4.15            | 1.55 | -2.68 | <b>.013</b> | -4.51                   | 1.60 | -2.82 | <b>.009</b>     |
| Pars opercularis       | L | -4.01         | 1.53 | -2.62 | <b>.014</b>             | -3.96         | 1.57 | -2.52 | <b>.018</b>     | -4.59            | 1.79 | -2.56 | <b>.016</b> | -4.97                   | 1.84 | -2.70 | <b>.012</b>     |
|                        | R | -4.43         | 1.42 | -3.11 | <b>.005</b>             | -3.83         | 1.44 | -2.66 | <b>.013</b>     | -4.88            | 1.62 | -3.02 | <b>.006</b> | -5.08                   | 1.69 | -3.01 | <b>.006</b>     |
| Pars orbitalis         | L | -1.60         | 0.44 | -3.61 | <b>.002</b>             | -1.28         | 0.46 | -2.81 | <b>.010</b>     | -1.53            | 0.52 | -2.95 | <b>.007</b> | -1.66                   | 0.54 | -3.08 | <b>.005</b>     |
|                        | R | -1.85         | 0.56 | -3.31 | <b>.003</b>             | -1.59         | 0.57 | -2.77 | <b>.010</b>     | -1.99            | 0.63 | -3.17 | <b>.004</b> | -2.10                   | 0.66 | -3.19 | <b>.004</b>     |
| Pars triangularis      | L | -3.57         | 1.11 | -3.23 | <b>.004</b>             | -2.91         | 1.17 | -2.48 | <b>.019</b>     | -3.60            | 1.33 | -2.70 | <b>.012</b> | -3.82                   | 1.38 | -2.77 | <b>.010</b>     |
|                        | R | -4.00         | 1.41 | -2.84 | <b>.009</b>             | -3.29         | 1.45 | -2.27 | <b>.031</b>     | -4.16            | 1.60 | -2.60 | <b>.015</b> | -4.35                   | 1.69 | -2.58 | <b>.015</b>     |
| Precentral             | L | -10.41        | 3.00 | -3.47 | <b>.002</b>             | -8.31         | 3.11 | -2.68 | <b>.013</b>     | -9.57            | 3.54 | -2.70 | <b>.012</b> | -10.54                  | 3.59 | -2.94 | <b>.007</b>     |
|                        | R | -10.93        | 3.01 | -3.63 | <b>.002</b>             | -9.95         | 3.15 | -3.16 | <b>.004</b>     | -11.53           | 3.58 | -3.22 | <b>.004</b> | -12.45                  | 3.71 | -3.36 | <b>.003</b>     |
| Rostral anterior       | L | -2.47         | 0.81 | -3.05 | <b>.006</b>             | -2.15         | 0.85 | -2.52 | <b>.018</b>     | -2.50            | 0.95 | -2.62 | <b>.014</b> | -2.73                   | 0.98 | -2.79 | <b>.010</b>     |
| cingulate              | R | -2.47         | 0.71 | -3.46 | <b>.002</b>             | -1.94         | 0.78 | -2.49 | <b>.019</b>     | -2.53            | 0.85 | -2.98 | <b>.007</b> | -2.67                   | 0.89 | -2.99 | <b>.006</b>     |
| Rostral middle frontal | L | -19.03        | 4.04 | -4.71 | <b>&lt;.001</b>         | -14.25        | 4.28 | -3.33 | <b>.003</b>     | -17.87           | 4.86 | -3.67 | <b>.002</b> | -19.19                  | 5.00 | -3.84 | <b>.001</b>     |
|                        | R | -15.79        | 4.19 | -3.77 | <b>.001</b>             | -10.14        | 4.38 | -2.32 | <b>.028</b>     | -12.37           | 4.89 | -2.53 | <b>.017</b> | -13.86                  | 4.94 | -2.81 | <b>.010</b>     |
| Superior frontal       | L | -20.89        | 4.33 | -4.83 | <b>&lt;.001</b>         | -18.01        | 4.64 | -3.88 | <b>.001</b>     | -21.49           | 5.20 | -4.13 | <b>.001</b> | -23.11                  | 5.40 | -4.28 | <b>&lt;.001</b> |
|                        | R | -19.16        | 4.54 | -4.22 | <b>&lt;.001</b>         | -18.33        | 4.72 | -3.88 | <b>&lt;.001</b> | -20.86           | 5.47 | -3.81 | <b>.001</b> | -22.54                  | 5.58 | -4.04 | <b>.001</b>     |
| Frontal pole           | L | -0.47         | 0.19 | -2.44 | <b>.021</b>             | -0.49         | 0.20 | -2.51 | <b>.018</b>     | -0.51            | 0.23 | -2.24 | <b>.033</b> | -0.56                   | 0.24 | -2.38 | <b>.024</b>     |
|                        | R | -0.70         | 0.26 | -2.70 | <b>.012</b>             | -0.49         | 0.28 | -1.75 | <b>.090</b>     | -0.54            | 0.30 | -1.79 | <b>.083</b> | -0.62                   | 0.32 | -1.94 | <b>.063</b>     |
| <b>Parietal</b>        |   |               |      |       |                         |               |      |       |                 |                  |      |       |             |                         |      |       |                 |
| Inferior parietal      | L | -13.96        | 3.62 | -3.86 | <b>.001</b>             | -11.97        | 3.71 | -3.22 | <b>.004</b>     | -13.84           | 4.03 | -3.43 | <b>.002</b> | -15.09                  | 4.27 | -3.53 | <b>.002</b>     |
|                        | R | -14.26        | 4.13 | -3.45 | <b>.002</b>             | -12.20        | 4.10 | -2.97 | <b>.007</b>     | -14.83           | 4.57 | -3.25 | <b>.004</b> | -15.67                  | 4.77 | -3.29 | <b>.003</b>     |
| Isthmus cingulate      | L | -3.40         | 1.04 | -3.26 | <b>.004</b>             | -2.46         | 1.12 | -2.20 | <b>.036</b>     | -3.17            | 1.27 | -2.49 | <b>.019</b> | -3.41                   | 1.32 | -2.59 | <b>.015</b>     |
|                        | R | -1.58         | 0.89 | -1.77 | <b>.086</b>             | -1.31         | 0.93 | -1.41 | <b>.167</b>     | -1.75            | 1.10 | -1.59 | <b>.119</b> | -1.80                   | 1.11 | -1.62 | <b>.115</b>     |
| Postcentral            | L | -12.04        | 2.81 | -4.29 | <b>&lt;.001</b>         | -10.65        | 2.93 | -3.63 | <b>.002</b>     | -11.93           | 3.35 | -3.57 | <b>.002</b> | -13.23                  | 3.41 | -3.88 | <b>.001</b>     |
|                        | R | -11.49        | 2.60 | -4.41 | <b>&lt;.001</b>         | -9.73         | 2.86 | -3.41 | <b>.003</b>     | -11.36           | 3.18 | -3.57 | <b>.002</b> | -12.40                  | 3.29 | -3.76 | <b>.001</b>     |
| Posterior cingulate    | L | -4.22         | 1.07 | -3.94 | <b>.001</b>             | -4.09         | 1.10 | -3.73 | <b>.001</b>     | -4.81            | 1.23 | -3.90 | <b>.001</b> | -5.09                   | 1.28 | -3.99 | <b>.001</b>     |
|                        | R | -4.09         | 1.17 | -3.49 | <b>.002</b>             | -3.23         | 1.24 | -2.61 | <b>.015</b>     | -4.01            | 1.46 | -2.76 | <b>.011</b> | -4.30                   | 1.48 | -2.90 | <b>.008</b>     |
| Precuneus              | L | -11.56        | 2.58 | -4.47 | <b>&lt;.001</b>         | -9.57         | 2.65 | -3.61 | <b>.002</b>     | -11.27           | 2.98 | -3.77 | <b>.001</b> | -12.31                  | 3.16 | -3.89 | <b>.001</b>     |
|                        | R | -11.24        | 2.81 | -3.99 | <b>.001</b>             | -10.45        | 2.95 | -3.54 | <b>.002</b>     | -12.06           | 3.30 | -3.65 | <b>.002</b> | -13.06                  | 3.44 | -3.79 | <b>.001</b>     |
| Superior parietal      | L | -11.25        | 3.62 | -3.11 | <b>.005</b>             | -10.00        | 3.72 | -2.69 | <b>.012</b>     | -11.35           | 4.18 | -2.71 | <b>.012</b> | -12.45                  | 4.29 | -2.90 | <b>.008</b>     |
|                        | R | -10.64        | 3.61 | -2.95 | <b>.007</b>             | -10.94        | 3.71 | -2.95 | <b>.007</b>     | -12.36           | 4.16 | -2.97 | <b>.007</b> | -13.28                  | 4.29 | -3.09 | <b>.005</b>     |



|                     |   | Externalizing |      |       |                 | Internalizing |      |       |                         | Thought Disorder |      |       |             | General Psychopathology |      |       |             |
|---------------------|---|---------------|------|-------|-----------------|---------------|------|-------|-------------------------|------------------|------|-------|-------------|-------------------------|------|-------|-------------|
|                     |   | B             | SE   | t     | p(FDR)          | B             | SE   | t     | p(FDR)                  | B                | SE   | t     | p(FDR)      | B                       | SE   | t     | p(FDR)      |
| Supramarginal       | L | -12.27        | 3.31 | -3.70 | <b>.002</b>     | -10.83        | 3.30 | -3.28 | <b>.003</b>             | -12.69           | 3.80 | -3.34 | <b>.003</b> | -13.70                  | 4.01 | -3.42 | <b>.002</b> |
|                     | R | -13.60        | 3.05 | -4.46 | <b>&lt;.001</b> | -11.21        | 3.29 | -3.41 | <b>.003</b>             | -13.46           | 3.86 | -3.49 | <b>.002</b> | -14.68                  | 3.97 | -3.69 | <b>.002</b> |
| <b>Temporal</b>     |   |               |      |       |                 |               |      |       |                         |                  |      |       |             |                         |      |       |             |
| Banks of superior   | L | -1.77         | 1.10 | -1.62 | .116            | -1.00         | 1.05 | -0.95 | .342                    | -1.43            | 1.20 | -1.19 | .239        | -1.50                   | 1.24 | -1.21 | .230        |
| temporal sulcus     | R | -1.89         | 0.85 | -2.23 | <b>.034</b>     | -1.24         | 0.87 | -1.42 | .164                    | -1.77            | 0.98 | -1.82 | .080        | -1.82                   | 1.02 | -1.79 | .084        |
| Entorhinal          | L | -0.87         | 0.44 | -2.00 | .055            | -0.71         | 0.45 | -1.58 | .123                    | -0.91            | 0.52 | -1.75 | .090        | -0.95                   | 0.52 | -1.82 | .080        |
|                     | R | -0.67         | 0.46 | -1.46 | .152            | -0.59         | 0.48 | -1.24 | .221                    | -0.71            | 0.54 | -1.31 | .198        | -0.76                   | 0.57 | -1.33 | .190        |
| Fusiform            | L | -7.70         | 2.20 | -3.50 | <b>.002</b>     | -5.77         | 2.26 | -2.55 | <b>.016</b>             | -7.15            | 2.58 | -2.77 | <b>.010</b> | -7.71                   | 2.69 | -2.86 | <b>.008</b> |
|                     | R | -8.06         | 2.07 | -3.89 | <b>.001</b>     | -6.32         | 2.14 | -2.95 | <b>.007</b>             | -7.38            | 2.43 | -3.04 | <b>.006</b> | -8.07                   | 2.52 | -3.20 | <b>.004</b> |
| Inferior temporal   | L | -9.16         | 2.51 | -3.65 | <b>.002</b>     | -7.21         | 2.66 | -2.71 | <b>.012</b>             | -8.88            | 3.00 | -2.96 | <b>.007</b> | -9.54                   | 3.09 | -3.08 | <b>.005</b> |
|                     | R | -10.17        | 2.24 | -4.54 | <b>&lt;.001</b> | -8.06         | 2.47 | -3.27 | <b>.003</b>             | -8.73            | 2.76 | -3.16 | <b>.004</b> | -9.93                   | 2.87 | -3.46 | <b>.002</b> |
| Middle temporal     | L | -8.58         | 2.19 | -3.91 | <b>.001</b>     | -6.50         | 2.21 | -2.94 | <b>.007</b>             | -8.47            | 2.51 | -3.37 | <b>.003</b> | -8.87                   | 2.59 | -3.43 | <b>.002</b> |
|                     | R | -10.92        | 2.32 | -4.70 | <b>&lt;.001</b> | -8.50         | 2.47 | -3.44 | <b>.002</b>             | -10.55           | 2.69 | -3.93 | <b>.001</b> | -11.26                  | 2.83 | -3.99 | <b>.001</b> |
| Parahippocampal     | L | -1.64         | 0.68 | -2.42 | <b>.022</b>     | -1.43         | 0.72 | -1.98 | .058                    | -1.68            | 0.83 | -2.03 | .052        | -1.80                   | 0.85 | -2.11 | <b>.044</b> |
|                     | R | -1.31         | 0.73 | -1.81 | .082            | -1.05         | 0.72 | -1.45 | .156                    | -1.53            | 0.84 | -1.82 | .080        | -1.50                   | 0.87 | -1.73 | .093        |
| Superior temporal   | L | -10.19        | 2.41 | -4.23 | <b>&lt;.001</b> | -8.41         | 2.49 | -3.38 | <b>.003</b>             | -9.82            | 2.84 | -3.46 | <b>.002</b> | -10.73                  | 2.93 | -3.66 | <b>.002</b> |
|                     | R | -9.21         | 2.11 | -4.36 | <b>&lt;.001</b> | -7.81         | 2.21 | -3.53 | <b>.002</b>             | -9.54            | 2.61 | -3.66 | <b>.002</b> | -10.19                  | 2.66 | -3.83 | <b>.001</b> |
| Temporal pole       | L | -0.96         | 0.32 | -3.01 | <b>.006</b>     | -0.85         | 0.33 | -2.59 | <b>.015</b>             | -0.99            | 0.37 | -2.63 | <b>.014</b> | -1.07                   | 0.38 | -2.78 | <b>.010</b> |
|                     | R | -0.36         | 0.32 | -1.13 | .261            | -0.40         | 0.34 | -1.17 | .246                    | -0.38            | 0.38 | -1.02 | .310        | -0.43                   | 0.39 | -1.11 | .271        |
| Transverse temporal | L | -0.94         | 0.42 | -2.21 | <b>.035</b>     | -0.75         | 0.42 | -1.78 | .085                    | -0.78            | 0.48 | -1.61 | .117        | -0.91                   | 0.50 | -1.81 | .080        |
|                     | R | -0.67         | 0.30 | -2.21 | <b>.036</b>     | -0.68         | 0.31 | -2.21 | <b>.035<sup>b</sup></b> | -0.77            | 0.35 | -2.20 | <b>.036</b> | -0.84                   | 0.36 | -2.31 | <b>.028</b> |
| <b>Occipital</b>    |   |               |      |       |                 |               |      |       |                         |                  |      |       |             |                         |      |       |             |
| Cuneus              | L | -2.54         | 1.08 | -2.35 | <b>.026</b>     | -2.14         | 1.11 | -1.93 | .064                    | -2.56            | 1.28 | -2.00 | .055        | -2.76                   | 1.34 | -2.06 | <b>.049</b> |
|                     | R | -3.01         | 1.20 | -2.51 | <b>.018</b>     | -2.24         | 1.23 | -1.82 | .080                    | -2.71            | 1.37 | -1.97 | .058        | -2.97                   | 1.45 | -2.05 | .050        |
| Lateral occipital   | L | -10.36        | 3.06 | -3.38 | <b>.003</b>     | -8.98         | 3.14 | -2.86 | <b>.009</b>             | -11.09           | 3.71 | -2.99 | <b>.006</b> | -11.82                  | 3.79 | -3.12 | <b>.005</b> |
|                     | R | -11.11        | 3.09 | -3.59 | <b>.002</b>     | -9.20         | 3.18 | -2.89 | <b>.008</b>             | -11.32           | 3.77 | -3.00 | <b>.006</b> | -11.98                  | 3.87 | -3.10 | <b>.005</b> |
| Lingual             | L | -4.05         | 2.17 | -1.86 | .074            | -3.08         | 2.31 | -1.33 | .189                    | -4.17            | 2.64 | -1.58 | .122        | -4.29                   | 2.73 | -1.57 | .123        |
|                     | R | -5.46         | 2.08 | -2.63 | <b>.014</b>     | -3.54         | 2.17 | -1.63 | .113                    | -5.27            | 2.56 | -2.06 | <b>.049</b> | -5.45                   | 2.58 | -2.11 | <b>.044</b> |
| Pericalcarine       | L | -2.25         | 1.22 | -1.84 | .077            | -1.72         | 1.27 | -1.35 | .184                    | -2.45            | 1.45 | -1.69 | .101        | -2.51                   | 1.52 | -1.65 | .108        |
|                     | R | -3.24         | 1.23 | -2.62 | <b>.014</b>     | -2.17         | 1.29 | -1.68 | .102                    | -3.44            | 1.48 | -2.32 | <b>.028</b> | -3.41                   | 1.55 | -2.20 | <b>.036</b> |
| Insula              | L | -4.46         | 1.19 | -3.76 | <b>.001</b>     | -4.51         | 1.29 | -3.49 | <b>.002</b>             | -5.18            | 1.45 | -3.57 | <b>.002</b> | -5.50                   | 1.50 | -3.66 | <b>.002</b> |
|                     | R | -4.20         | 1.29 | -3.27 | <b>.003</b>     | -4.06         | 1.36 | -2.98 | <b>.007</b>             | -5.23            | 1.52 | -3.45 | <b>.002</b> | -5.29                   | 1.59 | -3.32 | <b>.003</b> |

**Table S6.** The relationship between cortical thickness and psychopathology in the ABCD Study (n=10,858)

|                       |   | Externalizing |       |       |      | Internalizing |       |       |      | Thought Disorder |       |       |      | General Psychopathology |       |       |      |
|-----------------------|---|---------------|-------|-------|------|---------------|-------|-------|------|------------------|-------|-------|------|-------------------------|-------|-------|------|
|                       |   | B             | SE    | t     | p    | B             | SE    | t     | p    | B                | SE    | t     | p    | B                       | SE    | t     | p    |
| <b>Frontal</b>        |   |               |       |       |      |               |       |       |      |                  |       |       |      |                         |       |       |      |
| Caudal anterior       | L | 0.001         | 0.001 | 0.66  | .509 | 0.001         | 0.001 | 0.56  | .579 | 0.001            | 0.001 | 0.75  | .452 | 0.001                   | 0.002 | 0.68  | .494 |
| cingulate             | R | 0.000         | 0.001 | -0.06 | .949 | 0.000         | 0.001 | -0.32 | .747 | 0.000            | 0.001 | -0.15 | .877 | 0.000                   | 0.001 | -0.19 | .848 |
| Caudal middle         | L | 0.001         | 0.001 | 0.77  | .443 | 0.000         | 0.001 | 0.46  | .648 | 0.000            | 0.001 | 0.39  | .700 | 0.000                   | 0.001 | 0.51  | .613 |
| frontal               | R | -0.001        | 0.001 | -0.69 | .492 | -0.001        | 0.001 | -0.67 | .506 | -0.001           | 0.001 | -0.79 | .430 | -0.001                  | 0.001 | -0.77 | .441 |
| Lateral orbitofrontal | L | 0.000         | 0.001 | -0.22 | .827 | 0.000         | 0.001 | -0.18 | .855 | 0.000            | 0.001 | -0.35 | .725 | 0.000                   | 0.001 | -0.31 | .758 |
|                       | R | -0.001        | 0.001 | -0.96 | .337 | -0.001        | 0.001 | -0.97 | .332 | -0.001           | 0.001 | -0.96 | .339 | -0.001                  | 0.001 | -0.99 | .324 |
| Medial orbitofrontal  | L | 0.000         | 0.001 | 0.05  | .957 | 0.000         | 0.001 | 0.26  | .796 | 0.000            | 0.001 | 0.41  | .684 | 0.000                   | 0.001 | 0.35  | .727 |
|                       | R | 0.000         | 0.001 | 0.00  | .998 | 0.000         | 0.001 | -0.01 | .990 | 0.000            | 0.001 | 0.04  | .965 | 0.000                   | 0.001 | 0.01  | .990 |
| Paracentral           | L | 0.000         | 0.001 | -0.56 | .578 | -0.001        | 0.001 | -0.67 | .505 | -0.001           | 0.001 | -0.59 | .554 | -0.001                  | 0.001 | -0.64 | .523 |
|                       | R | -0.001        | 0.001 | -0.82 | .412 | -0.001        | 0.001 | -1.27 | .206 | -0.001           | 0.001 | -1.16 | .248 | -0.001                  | 0.001 | -1.15 | .251 |
| Pars opercularis      | L | 0.001         | 0.001 | 0.69  | .487 | 0.000         | 0.001 | 0.46  | .644 | 0.000            | 0.001 | 0.38  | .703 | 0.000                   | 0.001 | 0.45  | .651 |
|                       | R | 0.001         | 0.001 | 0.25  | .800 | 0.000         | 0.001 | 0.59  | .554 | 0.000            | 0.001 | 0.47  | .638 | 0.001                   | 0.001 | 0.51  | .612 |
| Pars orbitalis        | L | 0.001         | 0.001 | 1.14  | .255 | 0.001         | 0.001 | 0.52  | .601 | 0.001            | 0.001 | 0.64  | .520 | 0.001                   | 0.001 | 0.69  | .493 |
|                       | R | 0.001         | 0.001 | 0.48  | .633 | 0.000         | 0.001 | 0.01  | .990 | 0.000            | 0.001 | -0.12 | .903 | 0.000                   | 0.001 | 0.00  | .997 |
| Pars triangularis     | L | 0.000         | 0.001 | 0.12  | .907 | 0.000         | 0.001 | 0.30  | .767 | 0.000            | 0.001 | 0.32  | .747 | 0.000                   | 0.001 | 0.31  | .757 |
|                       | R | 0.001         | 0.001 | 1.37  | .172 | 0.001         | 0.001 | 0.68  | .494 | 0.001            | 0.001 | 0.83  | .407 | 0.001                   | 0.001 | 0.87  | .384 |
| Precentral            | L | 0.000         | 0.001 | -0.31 | .755 | 0.000         | 0.001 | -0.12 | .906 | 0.000            | 0.001 | -0.28 | .778 | 0.000                   | 0.001 | -0.22 | .825 |
|                       | R | -0.001        | 0.001 | -1.22 | .222 | -0.001        | 0.001 | -1.11 | .269 | -0.001           | 0.001 | -1.23 | .221 | -0.001                  | 0.001 | -1.19 | .234 |
| Rostral anterior      | L | 0.002         | 0.001 | 1.83  | .067 | 0.002         | 0.001 | 1.72  | .086 | 0.003            | 0.001 | 1.96  | .050 | 0.003                   | 0.001 | 1.94  | .052 |
| cingulate             | R | 0.001         | 0.001 | 0.93  | .354 | 0.001         | 0.001 | 0.48  | .632 | 0.001            | 0.001 | 0.78  | .438 | 0.001                   | 0.001 | 0.70  | .485 |
| Rostral middle        | L | 0.000         | 0.001 | 0.40  | .688 | 0.000         | 0.001 | -0.31 | .758 | 0.000            | 0.001 | -0.11 | .909 | 0.000                   | 0.001 | -0.10 | .923 |
| frontal               | R | 0.000         | 0.001 | 0.61  | .541 | 0.000         | 0.001 | 0.11  | .909 | 0.000            | 0.001 | 0.23  | .817 | 0.000                   | 0.001 | 0.25  | .803 |
| Superior frontal      | L | 0.001         | 0.001 | 1.51  | .132 | 0.001         | 0.001 | 1.13  | .257 | 0.001            | 0.001 | 1.28  | .202 | 0.001                   | 0.001 | 1.33  | .185 |
|                       | R | 0.001         | 0.001 | 1.20  | .231 | 0.001         | 0.001 | 0.83  | .404 | 0.001            | 0.001 | 0.93  | .352 | 0.001                   | 0.001 | 0.98  | .325 |
| Frontal pole          | L | 0.002         | 0.002 | 1.07  | .286 | 0.000         | 0.002 | 0.11  | .910 | 0.001            | 0.002 | 0.26  | .796 | 0.001                   | 0.002 | 0.30  | .764 |
|                       | R | 0.000         | 0.002 | 0.09  | .927 | -0.001        | 0.002 | -0.45 | .652 | -0.001           | 0.002 | -0.33 | .739 | -0.001                  | 0.002 | -0.37 | .714 |
| <b>Parietal</b>       |   |               |       |       |      |               |       |       |      |                  |       |       |      |                         |       |       |      |
| Inferior parietal     | L | -0.001        | 0.001 | -0.82 | .411 | 0.000         | 0.001 | -0.71 | .478 | -0.001           | 0.001 | -0.68 | .497 | -0.001                  | 0.001 | -0.71 | .476 |
|                       | R | 0.000         | 0.001 | 0.01  | .990 | 0.000         | 0.001 | 0.28  | .777 | 0.000            | 0.001 | 0.11  | .912 | 0.000                   | 0.001 | 0.18  | .855 |
| Isthmus cingulate     | L | 0.002         | 0.001 | 1.64  | .101 | 0.001         | 0.001 | 0.97  | .332 | 0.001            | 0.001 | 1.24  | .215 | 0.001                   | 0.001 | 1.21  | .227 |
|                       | R | 0.001         | 0.001 | 0.50  | .618 | 0.000         | 0.001 | 0.05  | .957 | 0.000            | 0.001 | -0.05 | .958 | 0.000                   | 0.001 | 0.07  | .946 |
| Postcentral           | L | 0.000         | 0.001 | -0.62 | .538 | -0.001        | 0.001 | -0.80 | .427 | -0.001           | 0.001 | -0.86 | .390 | -0.001                  | 0.001 | -0.81 | .417 |
|                       | R | 0.000         | 0.001 | -0.40 | .688 | 0.000         | 0.001 | -0.45 | .654 | -0.001           | 0.001 | -0.58 | .562 | -0.001                  | 0.001 | -0.54 | .592 |
| Posterior cingulate   | L | 0.001         | 0.001 | 1.50  | .133 | 0.001         | 0.001 | 1.35  | .176 | 0.001            | 0.001 | 1.50  | .134 | 0.001                   | 0.001 | 1.45  | .147 |
| Posterior cingulate   | R | 0.000         | 0.001 | 0.35  | .726 | 0.000         | 0.001 | 0.07  | .946 | 0.000            | 0.001 | 0.38  | .701 | 0.000                   | 0.001 | 0.30  | .766 |
| Precuneus             | L | 0.000         | 0.001 | -0.01 | .994 | 0.000         | 0.001 | -0.57 | .569 | 0.000            | 0.001 | -0.36 | .717 | 0.000                   | 0.001 | -0.39 | .695 |
|                       | R | 0.000         | 0.001 | -0.06 | .956 | 0.000         | 0.001 | -0.29 | .772 | 0.000            | 0.001 | 0.02  | .987 | 0.000                   | 0.001 | -0.06 | .950 |

|                     |   | Externalizing |       |       |      | Internalizing |       |       |      | Thought Disorder |       |       |      | General Psychopathology |       |       |      |
|---------------------|---|---------------|-------|-------|------|---------------|-------|-------|------|------------------|-------|-------|------|-------------------------|-------|-------|------|
|                     |   | B             | SE    | t     | p    | B             | SE    | t     | p    | B                | SE    | t     | p    | B                       | SE    | t     | p    |
| Superior parietal   | L | 0.000         | 0.001 | -0.10 | .918 | 0.000         | 0.001 | -0.26 | .794 | 0.000            | 0.001 | -0.33 | .744 | 0.000                   | 0.001 | -0.27 | .788 |
|                     | R | 0.000         | 0.001 | -0.37 | .712 | 0.000         | 0.001 | -0.41 | .684 | 0.000            | 0.001 | -0.36 | .723 | 0.000                   | 0.001 | -0.37 | .713 |
| Supramarginal       | L | 0.000         | 0.001 | -0.19 | .847 | 0.000         | 0.001 | -0.12 | .908 | 0.000            | 0.001 | -0.28 | .783 | 0.000                   | 0.001 | -0.20 | .839 |
|                     | R | 0.000         | 0.001 | 0.41  | .683 | 0.000         | 0.001 | -0.06 | .953 | 0.000            | 0.001 | -0.23 | .820 | 0.000                   | 0.001 | -0.06 | .956 |
| <b>Temporal</b>     |   |               |       |       |      |               |       |       |      |                  |       |       |      |                         |       |       |      |
| Banks of Superior   | L | 0.000         | 0.001 | -0.18 | .860 | 0.000         | 0.001 | -0.26 | .796 | 0.000            | 0.001 | 0.01  | .990 | 0.000                   | 0.001 | -0.09 | .927 |
| Temporal Sulcus     | R | 0.000         | 0.001 | 0.18  | .859 | 0.001         | 0.001 | 0.62  | .536 | 0.000            | 0.001 | 0.44  | .659 | 0.001                   | 0.001 | 0.49  | .627 |
| Entorhinal          | L | -0.001        | 0.002 | -0.79 | .428 | -0.002        | 0.002 | -0.96 | .337 | -0.002           | 0.002 | -0.88 | .382 | -0.002                  | 0.002 | -0.88 | .378 |
|                     | R | -0.002        | 0.002 | -0.79 | .430 | -0.001        | 0.002 | -0.38 | .703 | -0.001           | 0.002 | -0.42 | .677 | -0.001                  | 0.002 | -0.43 | .664 |
| Fusiform            | L | 0.000         | 0.001 | -0.31 | .754 | 0.000         | 0.001 | -0.20 | .840 | 0.000            | 0.001 | -0.26 | .795 | 0.000                   | 0.001 | -0.25 | .801 |
|                     | R | 0.000         | 0.001 | -0.50 | .616 | -0.001        | 0.001 | -0.78 | .434 | -0.001           | 0.001 | -0.89 | .376 | -0.001                  | 0.001 | -0.79 | .431 |
| Inferior temporal   | L | 0.000         | 0.001 | -0.49 | .626 | 0.000         | 0.001 | -0.39 | .699 | 0.000            | 0.001 | -0.28 | .783 | 0.000                   | 0.001 | -0.34 | .737 |
|                     | R | 0.000         | 0.001 | 0.19  | .846 | 0.000         | 0.001 | 0.40  | .688 | 0.000            | 0.001 | 0.36  | .716 | 0.000                   | 0.001 | 0.38  | .704 |
| Middle temporal     | L | 0.000         | 0.001 | 0.34  | .731 | 0.000         | 0.001 | -0.23 | .820 | 0.000            | 0.001 | 0.07  | .946 | 0.000                   | 0.001 | 0.05  | .960 |
|                     | R | 0.001         | 0.001 | 0.77  | .439 | 0.000         | 0.001 | 0.40  | .692 | 0.000            | 0.001 | 0.43  | .666 | 0.001                   | 0.001 | 0.50  | .616 |
| Parahippocampal     | L | -0.001        | 0.001 | -0.78 | .435 | 0.000         | 0.002 | -0.22 | .824 | -0.001           | 0.002 | -0.46 | .646 | -0.001                  | 0.002 | -0.42 | .677 |
|                     | R | 0.000         | 0.001 | -0.33 | .741 | 0.000         | 0.001 | -0.22 | .826 | -0.001           | 0.002 | -0.47 | .636 | -0.001                  | 0.002 | -0.34 | .733 |
| Superior temporal   | L | 0.001         | 0.001 | 0.92  | .357 | 0.000         | 0.001 | 0.21  | .836 | 0.000            | 0.001 | 0.34  | .731 | 0.000                   | 0.001 | 0.40  | .689 |
|                     | R | 0.000         | 0.001 | 0.46  | .646 | 0.000         | 0.001 | -0.07 | .941 | 0.000            | 0.001 | 0.07  | .945 | 0.000                   | 0.001 | 0.09  | .932 |
| Temporal pole       | L | 0.000         | 0.002 | 0.15  | .885 | -0.001        | 0.002 | -0.34 | .736 | -0.001           | 0.002 | -0.42 | .678 | -0.001                  | 0.002 | -0.33 | .742 |
|                     | R | 0.001         | 0.002 | 0.34  | .734 | 0.001         | 0.002 | 0.40  | .688 | 0.000            | 0.002 | 0.04  | .968 | 0.000                   | 0.002 | 0.20  | .843 |
| Transverse temporal | L | 0.001         | 0.001 | 0.59  | .557 | 0.000         | 0.001 | 0.19  | .851 | 0.000            | 0.001 | 0.14  | .887 | 0.000                   | 0.001 | 0.21  | .830 |
|                     | R | -0.001        | 0.001 | -0.80 | .426 | -0.002        | 0.001 | -1.55 | .121 | -0.002           | 0.001 | -1.31 | .191 | -0.002                  | 0.001 | -1.31 | .191 |
| <b>Occipital</b>    |   |               |       |       |      |               |       |       |      |                  |       |       |      |                         |       |       |      |
| Cuneus              | L | 0.000         | 0.001 | 0.13  | .896 | 0.000         | 0.001 | -0.05 | .963 | 0.000            | 0.001 | 0.18  | .857 | 0.000                   | 0.001 | 0.10  | .916 |
|                     | R | 0.000         | 0.001 | 0.07  | .945 | 0.000         | 0.001 | -0.55 | .580 | 0.000            | 0.001 | 0.01  | .991 | 0.000                   | 0.001 | -0.16 | .875 |
| Lateral occipital   | L | 0.000         | 0.001 | -0.36 | .722 | 0.000         | 0.001 | -0.43 | .667 | 0.000            | 0.001 | -0.25 | .804 | 0.000                   | 0.001 | -0.31 | .757 |
|                     | R | -0.001        | 0.001 | -0.99 | .323 | -0.001        | 0.001 | -0.85 | .397 | -0.001           | 0.001 | -0.87 | .385 | -0.001                  | 0.001 | -0.89 | .374 |
| Lingual             | L | 0.000         | 0.001 | -0.68 | .497 | -0.001        | 0.001 | -0.83 | .406 | -0.001           | 0.001 | -0.83 | .407 | -0.001                  | 0.001 | -0.84 | .401 |
|                     | R | 0.000         | 0.001 | -0.60 | .551 | -0.001        | 0.001 | -1.27 | .203 | -0.001           | 0.001 | -0.97 | .332 | -0.001                  | 0.001 | -1.05 | .294 |
| Perical carine      | L | 0.000         | 0.001 | -0.35 | .728 | -0.001        | 0.001 | -1.52 | .129 | -0.001           | 0.001 | -1.02 | .310 | -0.001                  | 0.001 | -1.11 | .268 |
|                     | R | 0.000         | 0.001 | 0.04  | .971 | 0.000         | 0.001 | -0.51 | .610 | 0.000            | 0.001 | -0.33 | .740 | 0.000                   | 0.001 | -0.40 | .693 |
| Insula              | L | -0.001        | 0.001 | -0.78 | .437 | 0.000         | 0.001 | -0.56 | .578 | -0.001           | 0.001 | -0.61 | .539 | -0.001                  | 0.001 | -0.64 | .524 |
|                     | R | -0.001        | 0.001 | -0.96 | .335 | -0.001        | 0.001 | -1.10 | .273 | -0.001           | 0.001 | -1.04 | .297 | -0.001                  | 0.001 | -1.05 | .295 |

**Note:** Uncorrected p-values reported, none of the p-values passed FDR correction

**Table S7:** The relationship between gray matter volume and psychopathology controlling for parental education and income in the ABCD Study (n=10,858)

|                        |   | Externalising |       |       |              | Internalising |       |       |              | Thought disorder |       |       |              | General psychopathology |       |       |              |
|------------------------|---|---------------|-------|-------|--------------|---------------|-------|-------|--------------|------------------|-------|-------|--------------|-------------------------|-------|-------|--------------|
|                        |   | B             | SE    | t     | p(FDR)       | B             | SE    | t     | p(FDR)       | B                | SE    | t     | p(FDR)       | B                       | SE    | t     | p(FDR)       |
| <b>Frontal</b>         |   |               |       |       |              |               |       |       |              |                  |       |       |              |                         |       |       |              |
| Caudal anterior        | L | -6.76         | 3.27  | -2.07 | <b>0.060</b> | -5.20         | 3.40  | -1.53 | 0.148        | -6.04            | 3.89  | -1.55 | 0.143        | -6.70                   | 4.07  | -1.65 | 0.122        |
| cingulate              | R | -10.51        | 3.32  | -3.16 | <b>0.009</b> | -7.64         | 3.46  | -2.21 | <b>0.045</b> | -9.98            | 3.94  | -2.53 | 0.027        | -10.52                  | 4.02  | -2.62 | <b>0.024</b> |
| Caudal middle frontal  | L | -13.04        | 8.00  | -1.63 | 0.126        | -11.07        | 8.14  | -1.36 | 0.190        | -13.17           | 9.20  | -1.43 | 0.171        | -14.03                  | 9.50  | -1.48 | 0.160        |
|                        | R | -21.91        | 8.17  | -2.68 | <b>0.021</b> | -19.79        | 8.63  | -2.29 | <b>0.041</b> | -22.17           | 9.43  | -2.35 | <b>0.038</b> | -24.46                  | 9.84  | -2.48 | <b>0.030</b> |
| Lateral orbitofrontal  | L | -19.13        | 4.95  | -3.87 | <b>0.007</b> | -14.44        | 5.29  | -2.73 | <b>0.019</b> | -18.68           | 5.87  | -3.18 | <b>0.009</b> | -19.85                  | 6.20  | -3.20 | <b>0.009</b> |
|                        | R | -20.94        | 5.21  | -4.02 | <b>0.007</b> | -16.83        | 5.43  | -3.10 | <b>0.009</b> | -20.47           | 6.12  | -3.34 | <b>0.009</b> | -22.13                  | 6.39  | -3.46 | <b>0.008</b> |
| Medial orbitofrontal   | L | -9.26         | 4.10  | -2.26 | <b>0.043</b> | -8.41         | 4.33  | -1.94 | 0.076        | -8.96            | 4.77  | -1.88 | 0.084        | -10.00                  | 5.08  | -1.97 | 0.073        |
|                        | R | -10.20        | 3.89  | -2.62 | <b>0.024</b> | -8.68         | 3.96  | -2.19 | <b>0.047</b> | -10.43           | 4.49  | -2.32 | <b>0.039</b> | -11.28                  | 4.68  | -2.41 | <b>0.034</b> |
| Paracentral            | L | -8.68         | 3.78  | -2.30 | <b>0.041</b> | -8.92         | 3.87  | -2.31 | <b>0.041</b> | -9.89            | 4.43  | -2.23 | <b>0.044</b> | -10.72                  | 4.52  | -2.37 | <b>0.036</b> |
|                        | R | -11.74        | 4.27  | -2.75 | <b>0.018</b> | -11.19        | 4.53  | -2.47 | <b>0.030</b> | -12.71           | 5.01  | -2.54 | <b>0.027</b> | -13.69                  | 5.24  | -2.61 | <b>0.024</b> |
| Pars opercularis       | L | -9.02         | 5.47  | -1.65 | <b>0.121</b> | -9.41         | 5.56  | -1.69 | 0.113        | -10.63           | 6.27  | -1.69 | 0.113        | -11.61                  | 6.57  | -1.77 | 0.102        |
|                        | R | -11.03        | 4.61  | -2.39 | <b>0.035</b> | -9.35         | 4.75  | -1.97 | 0.073        | -11.82           | 5.33  | -2.22 | 0.045        | -12.37                  | 5.55  | -2.23 | <b>0.044</b> |
| Pars orbitalis         | L | -4.47         | 1.94  | -2.30 | <b>0.041</b> | -3.90         | 2.03  | -1.93 | 0.077        | -4.47            | 2.28  | -1.96 | 0.075        | -4.87                   | 2.38  | -2.04 | 0.063        |
|                        | R | -6.76         | 2.42  | -2.79 | <b>0.018</b> | -5.93         | 2.44  | -2.43 | <b>0.033</b> | -7.52            | 2.71  | -2.77 | <b>0.018</b> | -7.87                   | 2.83  | -2.78 | <b>0.018</b> |
| Pars triangularis      | L | -10.27        | 3.99  | -2.57 | <b>0.025</b> | -8.02         | 4.21  | -1.91 | 0.080        | -9.39            | 4.80  | -1.96 | 0.075        | -10.29                  | 4.93  | -2.09 | 0.058        |
|                        | R | -9.65         | 4.99  | -1.93 | <b>0.076</b> | -8.22         | 5.18  | -1.59 | 0.134        | -10.23           | 5.64  | -1.81 | 0.094        | -10.75                  | 6.01  | -1.79 | 0.099        |
| Precentral             | L | -27.74        | 9.46  | -2.93 | <b>0.014</b> | -19.52        | 9.77  | -2.00 | 0.069        | -23.15           | 11.30 | -2.05 | 0.062        | -25.52                  | 11.38 | -2.24 | <b>0.043</b> |
|                        | R | -32.50        | 8.98  | -3.62 | <b>0.007</b> | -27.79        | 9.23  | -3.01 | <b>0.011</b> | -32.83           | 10.55 | -3.11 | <b>0.009</b> | -35.36                  | 10.92 | -3.24 | <b>0.009</b> |
| Rostral anterior       | L | -7.80         | 3.01  | -2.59 | <b>0.025</b> | -6.53         | 3.13  | -2.09 | 0.058        | -7.14            | 3.56  | -2.01 | 0.068        | -8.01                   | 3.62  | -2.22 | <b>0.045</b> |
| cingulate              | R | -7.49         | 2.72  | -2.76 | <b>0.018</b> | -5.69         | 2.92  | -1.95 | 0.075        | -7.37            | 3.21  | -2.30 | <b>0.041</b> | -7.87                   | 3.36  | -2.34 | <b>0.038</b> |
| Rostral middle frontal | L | -52.46        | 13.11 | -4.00 | <b>0.007</b> | -41.80        | 13.24 | -3.16 | <b>0.009</b> | -50.18           | 14.92 | -3.36 | <b>0.009</b> | -54.44                  | 15.77 | -3.45 | <b>0.008</b> |
|                        | R | -35.45        | 12.83 | -2.76 | <b>0.018</b> | -22.39        | 13.44 | -1.67 | 0.118        | -25.49           | 14.70 | -1.73 | 0.108        | -29.74                  | 15.27 | -1.95 | 0.075        |
| Superior frontal       | L | -55.89        | 15.11 | -3.70 | <b>0.007</b> | -48.47        | 15.60 | -3.11 | <b>0.009</b> | -56.15           | 17.47 | -3.21 | <b>0.009</b> | -61.17                  | 18.26 | -3.35 | <b>0.009</b> |
|                        | R | -50.47        | 15.34 | -3.29 | <b>0.009</b> | -51.53        | 15.74 | -3.27 | <b>0.009</b> | -55.91           | 17.83 | -3.14 | <b>0.009</b> | -61.00                  | 18.55 | -3.29 | <b>0.009</b> |
| Frontal pole           | L | -1.21         | 0.98  | -1.23 | 0.231        | -1.89         | 1.03  | -1.84 | 0.090        | -1.71            | 1.17  | -1.46 | 0.165        | -1.94                   | 1.21  | -1.61 | 0.129        |
|                        | R | -2.98         | 1.24  | -2.41 | <b>0.034</b> | -2.24         | 1.32  | -1.69 | 0.113        | -2.37            | 1.47  | -1.61 | 0.129        | -2.81                   | 1.52  | -1.85 | 0.090        |
| <b>Parietal</b>        |   |               |       |       |              |               |       |       |              |                  |       |       |              |                         |       |       |              |
| Inferior parietal      | L | -43.87        | 11.63 | -3.77 | <b>0.007</b> | -37.48        | 11.86 | -3.16 | <b>0.009</b> | -42.63           | 13.16 | -3.24 | <b>0.009</b> | -46.73                  | 13.79 | -3.39 | <b>0.009</b> |
|                        | R | -41.67        | 13.60 | -3.06 | <b>0.010</b> | -33.61        | 13.40 | -2.51 | <b>0.028</b> | -41.92           | 15.04 | -2.79 | <b>0.018</b> | -43.93                  | 15.75 | -2.79 | <b>0.018</b> |
| Isthmus cingulate      | L | -8.95         | 3.16  | -2.83 | <b>0.018</b> | -6.42         | 3.33  | -1.93 | 0.077        | -7.93            | 3.83  | -2.07 | 0.060        | -8.76                   | 3.93  | -2.23 | <b>0.044</b> |
|                        | R | -4.88         | 2.92  | -1.67 | 0.117        | -4.64         | 3.08  | -1.51 | 0.153        | -6.05            | 3.55  | -1.70 | 0.112        | -6.16                   | 3.64  | -1.69 | 0.113        |
| Post central           | L | -29.60        | 9.01  | -3.29 | <b>0.009</b> | -26.39        | 9.49  | -2.78 | <b>0.018</b> | -29.31           | 10.70 | -2.74 | <b>0.019</b> | -32.53                  | 11.00 | -2.96 | <b>0.013</b> |
|                        | R | -27.94        | 8.39  | -3.33 | <b>0.009</b> | -23.29        | 9.04  | -2.58 | <b>0.025</b> | -27.42           | 9.91  | -2.77 | <b>0.018</b> | -29.92                  | 10.38 | -2.88 | <b>0.016</b> |
| Posterior cingulate    | L | -11.35        | 3.39  | -3.35 | <b>0.009</b> | -11.16        | 3.52  | -3.17 | <b>0.009</b> | -12.92           | 3.99  | -3.24 | <b>0.009</b> | -13.76                  | 4.13  | -3.34 | <b>0.009</b> |
|                        | R | -10.72        | 3.66  | -2.93 | <b>0.014</b> | -8.38         | 3.92  | -2.14 | 0.052        | -10.24           | 4.53  | -2.26 | <b>0.043</b> | -11.04                  | 4.64  | -2.38 | <b>0.036</b> |
| Precuneus              | L | -29.48        | 8.15  | -3.62 | <b>0.007</b> | -24.38        | 8.15  | -2.99 | <b>0.012</b> | -28.35           | 9.15  | -3.10 | <b>0.009</b> | -31.16                  | 9.72  | -3.21 | <b>0.009</b> |
|                        | R | -28.39        | 8.36  | -3.39 | <b>0.009</b> | -26.41        | 8.49  | -3.11 | <b>0.009</b> | -28.94           | 9.62  | -3.01 | <b>0.011</b> | -32.02                  | 9.94  | -3.22 | <b>0.009</b> |

|                                   |   | Externalising |       |       |              | Internalising |       |       |              | Thought disorder |       |       |              | General psychopathology |       |       |              |
|-----------------------------------|---|---------------|-------|-------|--------------|---------------|-------|-------|--------------|------------------|-------|-------|--------------|-------------------------|-------|-------|--------------|
|                                   |   | B             | SE    | t     | p(FDR)       | B             | SE    | t     | p(FDR)       | B                | SE    | t     | p(FDR)       | B                       | SE    | t     | p(FDR)       |
| Superior parietal                 | L | -27.38        | 10.76 | -2.55 | <b>0.027</b> | -24.55        | 11.04 | -2.22 | <b>0.044</b> | -28.04           | 12.41 | -2.26 | <b>0.043</b> | -30.43                  | 12.84 | -2.37 | <b>0.036</b> |
|                                   | R | -28.04        | 11.03 | -2.54 | <b>0.027</b> | -27.94        | 11.28 | -2.48 | <b>0.030</b> | -31.43           | 12.59 | -2.50 | <b>0.029</b> | -33.81                  | 13.00 | -2.60 | <b>0.025</b> |
| Supramarginal                     | L | -33.75        | 10.81 | -3.12 | <b>0.009</b> | -28.79        | 10.87 | -2.65 | <b>0.023</b> | -34.05           | 12.46 | -2.73 | <b>0.019</b> | -36.80                  | 13.22 | -2.78 | <b>0.018</b> |
|                                   | R | -39.63        | 9.99  | -3.97 | <b>0.007</b> | -31.42        | 10.50 | -2.99 | <b>0.012</b> | -38.74           | 12.36 | -3.13 | <b>0.009</b> | -41.92                  | 12.93 | -3.24 | <b>0.009</b> |
| <b>Temporal</b>                   |   |               |       |       |              |               |       |       |              |                  |       |       |              |                         |       |       |              |
| Banks of superior temporal sulcus | L | -4.61         | 3.27  | -1.41 | 0.176        | -2.68         | 3.21  | -0.84 | 0.413        | -2.85            | 3.61  | -0.79 | 0.438        | -3.43                   | 3.73  | -0.92 | 0.367        |
|                                   | R | -4.19         | 2.68  | -1.56 | 0.141        | -1.95         | 2.79  | -0.70 | 0.491        | -3.34            | 3.13  | -1.07 | 0.296        | -3.38                   | 3.24  | -1.04 | 0.308        |
| Entorhinal                        | L | -4.74         | 2.03  | -2.34 | <b>0.039</b> | -4.69         | 2.11  | -2.22 | <b>0.045</b> | -5.21            | 2.36  | -2.21 | 0.045        | -5.57                   | 2.44  | -2.28 | <b>0.041</b> |
|                                   | R | -3.87         | 2.11  | -1.84 | 0.090        | -3.01         | 2.12  | -1.42 | 0.172        | -3.67            | 2.48  | -1.48 | 0.160        | -3.99                   | 2.63  | -1.51 | 0.151        |
| Fusiform                          | L | -24.21        | 8.48  | -2.85 | <b>0.017</b> | -16.06        | 8.72  | -1.84 | 0.090        | -20.52           | 9.80  | -2.09 | 0.058        | -22.24                  | 10.20 | -2.18 | <b>0.048</b> |
|                                   | R | -25.57        | 7.94  | -3.22 | <b>0.009</b> | -19.37        | 8.05  | -2.41 | <b>0.034</b> | -23.27           | 9.00  | -2.59 | <b>0.025</b> | -25.14                  | 9.39  | -2.68 | <b>0.021</b> |
| Inferior temporal                 | L | -31.36        | 10.04 | -3.12 | <b>0.009</b> | -23.90        | 10.54 | -2.27 | <b>0.042</b> | -27.91           | 11.80 | -2.37 | <b>0.037</b> | -30.86                  | 12.18 | -2.53 | <b>0.027</b> |
|                                   | R | -33.20        | 9.09  | -3.65 | <b>0.007</b> | -25.57        | 10.00 | -2.56 | <b>0.026</b> | -26.01           | 11.42 | -2.28 | <b>0.042</b> | -30.67                  | 11.59 | -2.65 | <b>0.023</b> |
| Middle temporal                   | L | -28.59        | 9.00  | -3.18 | <b>0.009</b> | -23.62        | 9.17  | -2.58 | <b>0.025</b> | -27.54           | 10.24 | -2.69 | <b>0.021</b> | -29.67                  | 10.56 | -2.81 | <b>0.018</b> |
|                                   | R | -33.78        | 9.30  | -3.63 | <b>0.007</b> | -27.18        | 9.86  | -2.76 | <b>0.018</b> | -33.01           | 10.43 | -3.16 | <b>0.009</b> | -35.32                  | 11.12 | -3.18 | <b>0.009</b> |
| Parahippocampal                   | L | -5.72         | 2.32  | -2.47 | <b>0.030</b> | -4.21         | 2.40  | -1.76 | 0.104        | -5.12            | 2.71  | -1.88 | 0.083        | -5.48                   | 2.81  | -1.95 | 0.075        |
|                                   | R | -3.16         | 2.32  | -1.36 | 0.190        | -2.25         | 2.27  | -0.99 | 0.330        | -3.77            | 2.64  | -1.43 | 0.171        | -3.48                   | 2.71  | -1.28 | 0.215        |
| Superior temporal                 | L | -27.40        | 9.04  | -3.03 | <b>0.011</b> | -23.80        | 9.45  | -2.52 | <b>0.028</b> | -26.35           | 10.64 | -2.48 | <b>0.030</b> | -29.20                  | 10.72 | -2.72 | <b>0.019</b> |
|                                   | R | -24.10        | 7.90  | -3.05 | <b>0.010</b> | -21.72        | 8.40  | -2.59 | <b>0.025</b> | -24.96           | 9.51  | -2.63 | <b>0.024</b> | -27.17                  | 9.73  | -2.79 | <b>0.018</b> |
| Temporal pole                     | L | -4.42         | 1.93  | -2.29 | <b>0.041</b> | -4.85         | 2.10  | -2.31 | <b>0.041</b> | -5.32            | 2.28  | -2.33 | <b>0.039</b> | -5.76                   | 2.35  | -2.45 | <b>0.031</b> |
|                                   | R | -0.44         | 1.89  | -0.23 | 0.821        | -0.43         | 1.98  | -0.22 | 0.827        | -0.52            | 2.21  | -0.23 | 0.821        | -0.50                   | 2.25  | -0.22 | 0.827        |
| Transverse temporal               | L | -2.33         | 1.44  | -1.61 | 0.129        | -2.13         | 1.42  | -1.50 | 0.153        | -2.01            | 1.62  | -1.24 | 0.229        | -2.43                   | 1.71  | -1.42 | 0.172        |
|                                   | R | -2.14         | 1.13  | -1.90 | 0.081        | -2.65         | 1.16  | -2.30 | <b>0.041</b> | -2.80            | 1.30  | -2.15 | 0.051        | -3.05                   | 1.36  | -2.25 | <b>0.043</b> |
| <b>Occipital</b>                  |   |               |       |       |              |               |       |       |              |                  |       |       |              |                         |       |       |              |
| Cuneus                            | L | -4.42         | 3.00  | -1.47 | 0.160        | -3.91         | 3.10  | -1.26 | 0.222        | -4.09            | 3.57  | -1.15 | 0.263        | -4.70                   | 3.68  | -1.28 | 0.217        |
|                                   | R | -5.83         | 3.32  | -1.76 | 0.104        | -4.53         | 3.52  | -1.29 | 0.215        | -4.62            | 3.99  | -1.16 | 0.259        | -5.49                   | 4.18  | -1.31 | 0.206        |
| Lateral occipital                 | L | -25.24        | 9.14  | -2.76 | <b>0.018</b> | -20.43        | 9.54  | -2.14 | 0.052        | -24.58           | 10.93 | -2.25 | 0.043        | -26.73                  | 11.21 | -2.38 | <b>0.036</b> |
|                                   | R | -30.83        | 9.38  | -3.29 | <b>0.009</b> | -25.06        | 9.62  | -2.61 | <b>0.024</b> | -30.99           | 11.12 | -2.79 | <b>0.018</b> | -32.66                  | 11.45 | -2.85 | <b>0.017</b> |
| Lingual                           | L | -8.68         | 6.18  | -1.41 | 0.176        | -6.96         | 6.44  | -1.08 | 0.292        | -8.96            | 7.30  | -1.23 | 0.232        | -9.36                   | 7.54  | -1.24 | 0.229        |
|                                   | R | -12.41        | 6.01  | -2.06 | 0.060        | -9.52         | 6.23  | -1.53 | 0.148        | -12.48           | 7.22  | -1.73 | 0.108        | -13.23                  | 7.33  | -1.81 | 0.096        |
| Perical carine                    | L | -3.50         | 2.26  | -1.55 | 0.143        | -4.00         | 2.34  | -1.71 | 0.111        | -4.56            | 2.65  | -1.72 | 0.110        | -4.86                   | 2.77  | -1.75 | 0.104        |
|                                   | R | -4.52         | 2.34  | -1.93 | 0.077        | -3.55         | 2.48  | -1.43 | 0.171        | -4.90            | 2.76  | -1.78 | 0.101        | -5.08                   | 2.93  | -1.73 | 0.108        |
| Insula                            | L | -14.98        | 4.09  | -3.66 | <b>0.007</b> | -14.87        | 4.24  | -3.51 | <b>0.008</b> | -16.91           | 4.74  | -3.57 | <b>0.007</b> | -18.09                  | 4.94  | -3.66 | <b>0.007</b> |
|                                   | R | -14.67        | 4.21  | -3.49 | <b>0.008</b> | -13.91        | 4.36  | -3.19 | <b>0.009</b> | -17.54           | 4.80  | -3.66 | <b>0.007</b> | -17.91                  | 5.12  | -3.50 | <b>0.008</b> |
| <b>Subcortical</b>                |   |               |       |       |              |               |       |       |              |                  |       |       |              |                         |       |       |              |
| Cerebellum                        | L | -40.53        | 23.93 | -1.69 | 0.189        | -16.45        | 24.89 | -0.66 | 0.517        | -32.75           | 28.65 | -1.14 | 0.345        | -32.55                  | 29.40 | -1.11 | 0.345        |
|                                   | R | -39.54        | 24.74 | -1.60 | 0.207        | -14.27        | 25.53 | -0.56 | 0.576        | -28.60           | 29.20 | -0.98 | 0.380        | -29.11                  | 29.78 | -0.98 | 0.380        |
| Thalamus                          | L | -10.39        | 3.41  | -3.05 | 0.066        | -7.70         | 3.64  | -2.11 | 0.131        | -9.26            | 4.08  | -2.27 | 0.125        | -10.21                  | 4.16  | -2.45 | 0.112        |
|                                   | R | -6.91         | 3.26  | -2.12 | 0.131        | -5.81         | 3.44  | -1.69 | 0.189        | -7.00            | 3.83  | -1.83 | 0.174        | -7.54                   | 3.96  | -1.91 | 0.152        |
| Caudate                           | L | -5.22         | 2.70  | -1.94 | 0.148        | -3.16         | 2.82  | -1.12 | 0.345        | -3.92            | 3.27  | -1.20 | 0.340        | -4.37                   | 3.41  | -1.28 | 0.313        |

1  
2  
3  
4  
5  
6  
7  
8  
9  
10  
11  
12  
13  
14  
15  
16  
17  
18  
19  
20  
21  
22  
23  
24  
25  
26  
27  
28  
29  
30  
31  
32  
33  
34  
35  
36  
37  
38  
39  
40  
41  
42  
43  
44  
45  
46

|                |   | Externalising |      |       |        | Internalising |      |       |        | Thought disorder |      |       |        | General psychopathology |      |       |        |
|----------------|---|---------------|------|-------|--------|---------------|------|-------|--------|------------------|------|-------|--------|-------------------------|------|-------|--------|
|                |   | B             | SE   | t     | p(FDR) | B             | SE   | t     | p(FDR) | B                | SE   | t     | p(FDR) | B                       | SE   | t     | p(FDR) |
|                | R | -5.91         | 2.79 | -2.12 | 0.131  | -3.99         | 2.88 | -1.39 | 0.271  | -4.52            | 3.29 | -1.38 | 0.271  | -5.11                   | 3.45 | -1.48 | 0.240  |
| Putamen        | L | -4.03         | 3.38 | -1.19 | 0.340  | -3.06         | 3.60 | -0.85 | 0.414  | -4.65            | 4.02 | -1.16 | 0.345  | -4.58                   | 4.20 | -1.09 | 0.345  |
|                | R | -3.71         | 2.96 | -1.25 | 0.320  | -3.00         | 3.15 | -0.95 | 0.382  | -3.87            | 3.52 | -1.10 | 0.345  | -4.07                   | 3.67 | -1.11 | 0.345  |
| Pallidum       | L | -1.83         | 1.26 | -1.45 | 0.246  | -1.29         | 1.26 | -1.02 | 0.372  | -1.26            | 1.48 | -0.85 | 0.414  | -1.55                   | 1.52 | -1.02 | 0.372  |
|                | R | -0.92         | 0.97 | -0.94 | 0.382  | -0.75         | 1.01 | -0.74 | 0.474  | -1.12            | 1.15 | -0.97 | 0.380  | -1.09                   | 1.21 | -0.90 | 0.398  |
| Hippocampus    | L | -5.25         | 2.06 | -2.55 | 0.112  | -4.46         | 2.14 | -2.08 | 0.134  | -4.82            | 2.45 | -1.97 | 0.147  | -5.36                   | 2.48 | -2.16 | 0.131  |
|                | R | -5.82         | 1.94 | -3.00 | 0.066  | -6.20         | 2.12 | -2.92 | 0.066  | -6.34            | 2.37 | -2.68 | 0.096  | -6.98                   | 2.43 | -2.87 | 0.066  |
| Amygdala       | L | -1.75         | 1.04 | -1.69 | 0.189  | -1.94         | 1.11 | -1.75 | 0.187  | -1.85            | 1.22 | -1.51 | 0.233  | -2.05                   | 1.27 | -1.62 | 0.207  |
|                | R | -2.42         | 1.05 | -2.32 | 0.120  | -2.54         | 1.10 | -2.32 | 0.120  | -2.46            | 1.25 | -1.97 | 0.147  | -2.81                   | 1.27 | -2.21 | 0.131  |
| Accumbens area | L | -1.36         | 0.55 | -2.49 | 0.112  | -0.91         | 0.57 | -1.59 | 0.207  | -1.03            | 0.65 | -1.59 | 0.207  | -1.17                   | 0.67 | -1.75 | 0.187  |
|                | R | -1.20         | 0.50 | -2.42 | 0.112  | -0.98         | 0.50 | -1.96 | 0.147  | -0.98            | 0.56 | -1.74 | 0.187  | -1.15                   | 0.58 | -1.98 | 0.147  |

For Peer Review

**Table S8:** The relationship between surface area and psychopathology controlling for parental education and income in the ABCD Study (n=10,858)

|                            |   | Externalising |      |       |              | Internalising |      |       |              | Thought disorder |      |       |              | General psychopathology |      |       |              |
|----------------------------|---|---------------|------|-------|--------------|---------------|------|-------|--------------|------------------|------|-------|--------------|-------------------------|------|-------|--------------|
|                            |   | B             | SE   | t     | p(FD R)      | B             | SE   | t     | p(FD R)      | B                | SE   | t     | p(FD R)      | B                       | SE   | t     | p(FD R)      |
| <b>Frontal</b>             |   |               |      |       |              |               |      |       |              |                  |      |       |              |                         |      |       |              |
| Caudal anterior cingulate  | L | -2.04         | 0.88 | -2.32 | <b>0.031</b> | -1.58         | 0.89 | -1.79 | 0.090        | -1.85            | 1.02 | -1.81 | 0.087        | -2.04                   | 1.06 | -1.92 | 0.071        |
|                            | R | -3.14         | 0.90 | -3.50 | <b>0.004</b> | -2.30         | 0.96 | -2.39 | <b>0.028</b> | -2.98            | 1.08 | -2.76 | <b>0.015</b> | -3.16                   | 1.11 | -2.85 | <b>0.012</b> |
| Caudal middle frontal      | L | -5.38         | 2.32 | -2.32 | <b>0.031</b> | -4.39         | 2.35 | -1.87 | 0.077        | -5.14            | 2.67 | -1.93 | 0.070        | -5.58                   | 2.77 | -2.02 | 0.059        |
|                            | R | -6.53         | 2.37 | -2.75 | <b>0.015</b> | -5.90         | 2.54 | -2.32 | <b>0.031</b> | -6.45            | 2.83 | -2.28 | <b>0.034</b> | -7.19                   | 2.94 | -2.44 | <b>0.026</b> |
| Lateral orbitofrontal      | L | -5.47         | 1.51 | -3.62 | <b>0.004</b> | -3.90         | 1.62 | -2.41 | <b>0.027</b> | -5.15            | 1.79 | -2.87 | <b>0.012</b> | -5.47                   | 1.88 | -2.91 | <b>0.011</b> |
|                            | R | -5.72         | 1.61 | -3.55 | <b>0.004</b> | -4.35         | 1.69 | -2.58 | <b>0.020</b> | -5.42            | 1.91 | -2.84 | <b>0.012</b> | -5.88                   | 1.97 | -2.98 | <b>0.009</b> |
| Medial orbitofrontal       | L | -3.01         | 1.30 | -2.31 | <b>0.031</b> | -2.52         | 1.32 | -1.91 | 0.072        | -2.93            | 1.53 | -1.92 | <b>0.071</b> | -3.20                   | 1.58 | -2.02 | 0.058        |
|                            | R | -3.46         | 1.11 | -3.13 | <b>0.007</b> | -2.80         | 1.13 | -2.49 | <b>0.024</b> | -3.42            | 1.30 | -2.63 | <b>0.019</b> | -3.69                   | 1.34 | -2.77 | <b>0.015</b> |
| Paracentral                | L | -2.49         | 1.11 | -2.24 | <b>0.036</b> | -2.60         | 1.12 | -2.31 | <b>0.031</b> | -2.90            | 1.29 | -2.25 | <b>0.035</b> | -3.13                   | 1.31 | -2.38 | <b>0.028</b> |
|                            | R | -3.69         | 1.30 | -2.83 | <b>0.012</b> | -3.40         | 1.37 | -2.49 | <b>0.024</b> | -3.83            | 1.55 | -2.47 | <b>0.025</b> | -4.19                   | 1.61 | -2.61 | <b>0.019</b> |
| Pars opercularis           | L | -3.72         | 1.54 | -2.42 | <b>0.027</b> | -3.61         | 1.57 | -2.29 | <b>0.033</b> | -4.15            | 1.79 | -2.32 | <b>0.031</b> | -4.52                   | 1.84 | -2.45 | <b>0.026</b> |
|                            | R | -4.15         | 1.42 | -2.91 | <b>0.011</b> | -3.52         | 1.44 | -2.44 | <b>0.026</b> | -4.49            | 1.63 | -2.76 | <b>0.015</b> | -4.68                   | 1.70 | -2.76 | <b>0.015</b> |
| Pars orbitalis             | L | -1.45         | 0.44 | -3.30 | <b>0.006</b> | -1.11         | 0.45 | -2.45 | <b>0.026</b> | -1.32            | 0.52 | -2.56 | <b>0.021</b> | -1.45                   | 0.54 | -2.70 | <b>0.016</b> |
|                            | R | -1.69         | 0.56 | -3.02 | <b>0.009</b> | -1.38         | 0.57 | -2.41 | <b>0.027</b> | -1.73            | 0.62 | -2.78 | <b>0.014</b> | -1.84                   | 0.66 | -2.80 | <b>0.013</b> |
| Pars triangularis          | L | -3.36         | 1.11 | -3.04 | <b>0.008</b> | -2.65         | 1.17 | -2.26 | <b>0.035</b> | -3.28            | 1.33 | -2.46 | <b>0.026</b> | -3.50                   | 1.38 | -2.53 | <b>0.022</b> |
|                            | R | -3.83         | 1.41 | -2.72 | <b>0.015</b> | -3.09         | 1.45 | -2.13 | <b>0.046</b> | -3.92            | 1.60 | -2.45 | <b>0.026</b> | -4.11                   | 1.69 | -2.43 | <b>0.026</b> |
| Precentral                 | L | -9.47         | 3.00 | -3.15 | <b>0.007</b> | -7.19         | 3.10 | -2.32 | <b>0.031</b> | -8.16            | 3.53 | -2.31 | <b>0.031</b> | -9.13                   | 3.58 | -2.55 | <b>0.022</b> |
|                            | R | -10.08        | 3.01 | -3.35 | <b>0.005</b> | -8.97         | 3.15 | -2.85 | <b>0.012</b> | -10.25           | 3.56 | -2.88 | <b>0.012</b> | -11.18                  | 3.71 | -3.02 | <b>0.009</b> |
| Rostral anterior cingulate | L | -2.25         | 0.81 | -2.78 | <b>0.014</b> | -1.89         | 0.85 | -2.22 | <b>0.037</b> | -2.20            | 0.95 | -2.31 | <b>0.031</b> | -2.42                   | 0.98 | -2.47 | <b>0.025</b> |
|                            | R | -2.30         | 0.71 | -3.22 | <b>0.006</b> | -1.76         | 0.78 | -2.25 | <b>0.036</b> | -2.31            | 0.85 | -2.71 | <b>0.015</b> | -2.44                   | 0.90 | -2.73 | <b>0.015</b> |
| Rostral middle frontal     | L | -17.60        | 4.03 | -4.37 | <b>0.001</b> | -12.59        | 4.28 | -2.94 | <b>0.010</b> | -15.81           | 4.84 | -3.27 | <b>0.006</b> | -17.10                  | 4.99 | -3.43 | <b>0.005</b> |
|                            | R | -14.63        | 4.18 | -3.50 | <b>0.004</b> | -8.76         | 4.39 | -2.00 | 0.061        | -10.64           | 4.87 | -2.18 | <b>0.041</b> | -12.12                  | 4.93 | -2.46 | <b>0.026</b> |
| Superior frontal           | L | -19.48        | 4.32 | -4.51 | <b>0.001</b> | -16.38        | 4.64 | -3.53 | <b>0.004</b> | -19.43           | 5.16 | -3.76 | <b>0.004</b> | -21.03                  | 5.38 | -3.91 | <b>0.002</b> |
|                            | R | -17.68        | 4.55 | -3.89 | <b>0.002</b> | -16.61        | 4.71 | -3.52 | <b>0.004</b> | -18.68           | 5.45 | -3.43 | <b>0.005</b> | -20.34                  | 5.57 | -3.65 | <b>0.004</b> |
| Frontal pole               | L | -0.43         | 0.19 | -2.27 | <b>0.034</b> | -0.46         | 0.20 | -2.34 | <b>0.031</b> | -0.47            | 0.23 | -2.04 | 0.056        | -0.52                   | 0.24 | -2.20 | <b>0.040</b> |
|                            | R | -0.65         | 0.26 | -2.50 | <b>0.024</b> | -0.43         | 0.28 | -1.53 | 0.142        | -0.47            | 0.30 | -1.54 | 0.141        | -0.55                   | 0.32 | -1.69 | 0.108        |
| <b>Parietal</b>            |   |               |      |       |              |               |      |       |              |                  |      |       |              |                         |      |       |              |
| Inferior parietal          | L | -13.10        | 3.61 | -3.63 | <b>0.004</b> | -10.92        | 3.70 | -2.95 | <b>0.010</b> | -12.50           | 4.03 | -3.11 | <b>0.007</b> | -13.77                  | 4.27 | -3.23 | <b>0.006</b> |
|                            | R | -13.13        | 4.13 | -3.18 | <b>0.007</b> | -10.88        | 4.10 | -2.65 | <b>0.018</b> | -13.13           | 4.57 | -2.87 | <b>0.012</b> | -13.97                  | 4.77 | -2.93 | <b>0.010</b> |
| Isthmus cingulate          | L | -3.23         | 1.05 | -3.09 | <b>0.008</b> | -2.24         | 1.12 | -2.00 | 0.061        | -2.91            | 1.28 | -2.28 | 0.034        | -3.14                   | 1.32 | -2.38 | <b>0.028</b> |
|                            | R | -1.45         | 0.89 | -1.62 | 0.122        | -1.15         | 0.93 | -1.23 | 0.230        | -1.55            | 1.10 | -1.41 | 0.173        | -1.60                   | 1.11 | -1.44 | 0.167        |
| Post central               | L | -11.25        | 2.81 | -4.00 | <b>0.002</b> | -9.82         | 2.93 | -3.35 | <b>0.005</b> | -10.89           | 3.35 | -3.25 | <b>0.006</b> | -12.17                  | 3.41 | -3.56 | <b>0.004</b> |
|                            | R | -10.81        | 2.60 | -4.15 | <b>0.001</b> | -9.01         | 2.86 | -3.15 | <b>0.007</b> | -10.45           | 3.17 | -3.29 | <b>0.006</b> | -11.47                  | 3.29 | -3.48 | <b>0.004</b> |
| Posterior cingulate        | L | -3.95         | 1.07 | -3.70 | <b>0.004</b> | -3.76         | 1.10 | -3.43 | <b>0.005</b> | -4.40            | 1.23 | -3.58 | <b>0.004</b> | -4.69                   | 1.27 | -3.68 | <b>0.004</b> |
|                            | R | -3.78         | 1.17 | -3.23 | <b>0.006</b> | -2.91         | 1.24 | -2.34 | <b>0.030</b> | -3.64            | 1.46 | -2.49 | <b>0.024</b> | -3.90                   | 1.49 | -2.62 | <b>0.019</b> |

1  
2  
3  
4  
5  
6  
7  
8  
9  
10  
11  
12  
13  
14  
15  
16  
17  
18  
19  
20  
21  
22  
23  
24  
25  
26  
27  
28  
29  
30  
31  
32  
33  
34  
35  
36  
37  
38  
39  
40  
41  
42  
43  
44  
45  
46

|                                   |   | Externalising |      |       |              | Internalising |      |       |              | Thought disorder |      |       |              | General psychopathology |      |       |              |
|-----------------------------------|---|---------------|------|-------|--------------|---------------|------|-------|--------------|------------------|------|-------|--------------|-------------------------|------|-------|--------------|
|                                   |   | B             | SE   | t     | p(FD R)      | B             | SE   | t     | p(FD R)      | B                | SE   | t     | p(FD R)      | B                       | SE   | t     | p(FD R)      |
| Precuneus                         | L | -10.78        | 2.59 | -4.16 | <b>0.001</b> | -8.65         | 2.64 | -3.28 | <b>0.006</b> | -10.14           | 2.98 | -3.41 | <b>0.005</b> | -11.16                  | 3.15 | -3.54 | <b>0.004</b> |
|                                   | R | -10.32        | 2.81 | -3.67 | <b>0.004</b> | -9.39         | 2.94 | -3.19 | <b>0.007</b> | -10.75           | 3.30 | -3.26 | <b>0.006</b> | -11.73                  | 3.43 | -3.42 | <b>0.005</b> |
| Superior parietal                 | L | -10.31        | 3.61 | -2.85 | <b>0.012</b> | -9.00         | 3.72 | -2.42 | <b>0.027</b> | -10.11           | 4.18 | -2.42 | <b>0.027</b> | -11.18                  | 4.29 | -2.61 | <b>0.019</b> |
|                                   | R | -9.64         | 3.62 | -2.67 | <b>0.017</b> | -9.80         | 3.70 | -2.65 | <b>0.018</b> | -10.97           | 4.16 | -2.64 | <b>0.018</b> | -11.86                  | 4.28 | -2.77 | <b>0.014</b> |
| Supramarginal                     | L | -11.28        | 3.32 | -3.40 | <b>0.005</b> | -9.65         | 3.29 | -2.93 | <b>0.010</b> | -11.21           | 3.79 | -2.96 | <b>0.010</b> | -12.22                  | 3.99 | -3.06 | <b>0.008</b> |
|                                   | R | -12.75        | 3.05 | -4.18 | <b>0.001</b> | -10.17        | 3.29 | -3.09 | <b>0.007</b> | -12.19           | 3.85 | -3.17 | <b>0.007</b> | -13.40                  | 3.96 | -3.38 | <b>0.005</b> |
| <b>Temporal</b>                   |   |               |      |       |              |               |      |       |              |                  |      |       |              |                         |      |       |              |
| Banks of superior temporal sulcus | L | -1.55         | 1.10 | -1.41 | 0.173        | -0.76         | 1.06 | -0.71 | 0.475        | -1.13            | 1.20 | -0.94 | 0.355        | -1.19                   | 1.24 | -0.96 | 0.342        |
|                                   | R | -1.69         | 0.85 | -1.99 | 0.061        | -1.01         | 0.87 | -1.15 | 0.262        | -1.48            | 0.98 | -1.52 | 0.146        | -1.52                   | 1.02 | -1.50 | 0.150        |
| Entorhinal                        | L | -0.78         | 0.44 | -1.79 | 0.090        | -0.60         | 0.45 | -1.31 | 0.204        | -0.76            | 0.52 | -1.46 | 0.159        | -0.81                   | 0.53 | -1.53 | 0.142        |
|                                   | R | -0.54         | 0.46 | -1.19 | 0.246        | -0.45         | 0.48 | -0.93 | 0.355        | -0.53            | 0.54 | -0.98 | 0.335        | -0.58                   | 0.58 | -1.02 | 0.321        |
| Fusiform                          | L | -6.89         | 2.21 | -3.12 | <b>0.007</b> | -4.79         | 2.26 | -2.12 | <b>0.048</b> | -5.94            | 2.57 | -2.31 | <b>0.031</b> | -6.48                   | 2.69 | -2.41 | <b>0.027</b> |
|                                   | R | -7.26         | 2.09 | -3.47 | <b>0.004</b> | -5.37         | 2.14 | -2.51 | <b>0.024</b> | -6.19            | 2.43 | -2.55 | <b>0.022</b> | -6.87                   | 2.53 | -2.72 | <b>0.015</b> |
| Inferior temporal                 | L | -8.45         | 2.51 | -3.37 | <b>0.005</b> | -6.38         | 2.65 | -2.41 | <b>0.027</b> | -7.81            | 2.99 | -2.61 | <b>0.019</b> | -8.48                   | 3.08 | -2.75 | <b>0.015</b> |
|                                   | R | -9.59         | 2.24 | -4.29 | <b>0.001</b> | -7.36         | 2.46 | -2.99 | <b>0.009</b> | -7.84            | 2.76 | -2.84 | <b>0.012</b> | -9.04                   | 2.87 | -3.15 | <b>0.007</b> |
| Middle temporal                   | L | -7.97         | 2.19 | -3.63 | <b>0.004</b> | -5.81         | 2.20 | -2.63 | <b>0.018</b> | -7.60            | 2.51 | -3.03 | <b>0.008</b> | -7.99                   | 2.58 | -3.09 | <b>0.007</b> |
|                                   | R | -10.21        | 2.32 | -4.40 | <b>0.001</b> | -7.63         | 2.46 | -3.10 | <b>0.007</b> | -9.46            | 2.68 | -3.53 | <b>0.004</b> | -10.17                  | 2.81 | -3.62 | <b>0.004</b> |
| Parahippocampal                   | L | -1.53         | 0.68 | -2.24 | <b>0.036</b> | -1.29         | 0.72 | -1.78 | 0.091        | -1.50            | 0.83 | -1.81 | 0.087        | -1.62                   | 0.85 | -1.90 | 0.073        |
|                                   | R | -1.15         | 0.73 | -1.58 | 0.132        | -0.85         | 0.72 | -1.17 | 0.254        | -1.27            | 0.84 | -1.50 | 0.149        | -1.24                   | 0.87 | -1.43 | 0.167        |
| Superior temporal                 | L | -9.55         | 2.41 | -3.96 | <b>0.002</b> | -7.62         | 2.48 | -3.07 | <b>0.008</b> | -8.81            | 2.83 | -3.11 | <b>0.007</b> | -9.72                   | 2.93 | -3.31 | <b>0.006</b> |
|                                   | R | -8.46         | 2.12 | -3.99 | <b>0.002</b> | -6.93         | 2.21 | -3.13 | <b>0.007</b> | -8.44            | 2.60 | -3.25 | <b>0.006</b> | -9.09                   | 2.65 | -3.43 | <b>0.005</b> |
| Temporal pole                     | L | -0.91         | 0.32 | -2.85 | <b>0.012</b> | -0.80         | 0.33 | -2.42 | <b>0.027</b> | -0.91            | 0.37 | -2.43 | <b>0.026</b> | -1.00                   | 0.39 | -2.59 | <b>0.020</b> |
|                                   | R | -0.31         | 0.32 | -0.98 | 0.335        | -0.34         | 0.34 | -1.00 | 0.326        | -0.31            | 0.38 | -0.82 | 0.415        | -0.36                   | 0.39 | -0.91 | 0.364        |
| Transverse temporal               | L | -0.87         | 0.42 | -2.05 | 0.055        | -0.67         | 0.42 | -1.58 | 0.131        | -0.68            | 0.49 | -1.39 | 0.177        | -0.81                   | 0.50 | -1.61 | 0.126        |
|                                   | R | -0.59         | 0.30 | -1.95 | 0.067        | -0.60         | 0.31 | -1.92 | 0.071        | -0.66            | 0.35 | -1.89 | 0.075        | -0.73                   | 0.36 | -2.01 | 0.060        |
| <b>Occipital</b>                  |   |               |      |       |              |               |      |       |              |                  |      |       |              |                         |      |       |              |
| Cuneus                            | L | -2.27         | 1.08 | -2.10 | <b>0.049</b> | -1.83         | 1.11 | -1.64 | 0.118        | -2.20            | 1.28 | -1.72 | 0.103        | -2.39                   | 1.35 | -1.77 | 0.092        |
|                                   | R | -2.83         | 1.20 | -2.36 | <b>0.030</b> | -2.04         | 1.23 | -1.66 | 0.115        | -2.47            | 1.37 | -1.80 | 0.088        | -2.73                   | 1.45 | -1.88 | 0.076        |
| Lateral occipital                 | L | -9.26         | 3.06 | -3.02 | <b>0.009</b> | -7.61         | 3.14 | -2.42 | <b>0.027</b> | -9.43            | 3.69 | -2.55 | 0.022        | -10.13                  | 3.77 | -2.68 | <b>0.017</b> |
|                                   | R | -10.03        | 3.10 | -3.24 | <b>0.006</b> | -7.98         | 3.17 | -2.51 | <b>0.023</b> | -9.85            | 3.76 | -2.62 | 0.019        | -10.47                  | 3.86 | -2.72 | <b>0.015</b> |
| Lingual                           | L | -3.46         | 2.18 | -1.59 | 0.129        | -2.41         | 2.32 | -1.04 | 0.310        | -3.37            | 2.63 | -1.28 | 0.215        | -3.46                   | 2.73 | -1.27 | 0.219        |
|                                   | R | -4.95         | 2.08 | -2.38 | <b>0.028</b> | -2.92         | 2.18 | -1.34 | 0.193        | -4.53            | 2.56 | -1.77 | 0.092        | -4.69                   | 2.58 | -1.82 | 0.086        |
| Perical carine                    | L | -2.00         | 1.22 | -1.64 | <b>0.118</b> | -1.43         | 1.28 | -1.12 | 0.273        | -2.11            | 1.46 | -1.45 | 0.163        | -2.16                   | 1.52 | -1.42 | 0.171        |
|                                   | R | -3.08         | 1.23 | -2.50 | <b>0.024</b> | -1.97         | 1.29 | -1.52 | 0.145        | -3.19            | 1.49 | -2.14 | <b>0.045</b> | -3.16                   | 1.56 | -2.03 | 0.057        |
| Insula                            | L | -4.13         | 1.19 | -3.47 | <b>0.004</b> | -4.17         | 1.29 | -3.23 | <b>0.006</b> | -4.75            | 1.45 | -3.27 | <b>0.006</b> | -5.06                   | 1.50 | -3.37 | <b>0.005</b> |
|                                   | R | -3.90         | 1.29 | -3.02 | <b>0.009</b> | -3.75         | 1.36 | -2.75 | <b>0.015</b> | -4.83            | 1.51 | -3.19 | <b>0.007</b> | -4.89                   | 1.60 | -3.06 | <b>0.008</b> |



**Table S9:** The relationship between cortical volume and psychopathology controlling for parental education, income and maternal psychopathology in the ABCD Study (n=10,858)

|                            |   | Externalising |       |       |              | Internalising |       |       |              | Thought disorder |       |       |              | General psychopathology |       |       |              |
|----------------------------|---|---------------|-------|-------|--------------|---------------|-------|-------|--------------|------------------|-------|-------|--------------|-------------------------|-------|-------|--------------|
|                            |   | B             | SE    | t     | p(FD R)      | B             | SE    | t     | p(FD R)      | B                | SE    | t     | p(FD R)      | B                       | SE    | t     | p(FD R)      |
| <b>Frontal</b>             |   |               |       |       |              |               |       |       |              |                  |       |       |              |                         |       |       |              |
| Caudal anterior cingulate  | L | -6.28         | 3.33  | -1.89 | 0.087        | -4.65         | 3.47  | -1.34 | 0.199        | -5.44            | 3.96  | -1.37 | 0.190        | -6.06                   | 4.15  | -1.46 | 0.166        |
|                            | R | -10.51        | 3.39  | -3.10 | <b>0.015</b> | -7.55         | 3.53  | -2.14 | 0.057        | -9.91            | 4.02  | -2.47 | <b>0.033</b> | -10.46                  | 4.10  | -2.55 | <b>0.030</b> |
| Caudal middle frontal      | L | -12.92        | 8.15  | -1.59 | 0.137        | -10.94        | 8.30  | -1.32 | 0.204        | -13.03           | 9.36  | -1.39 | 0.185        | -13.91                  | 9.68  | -1.44 | 0.173        |
|                            | R | -20.73        | 8.31  | -2.49 | <b>0.032</b> | -18.54        | 8.81  | -2.11 | 0.061        | -20.81           | 9.59  | -2.17 | 0.055        | -23.03                  | 10.04 | -2.29 | <b>0.045</b> |
| Lateral orbitofrontal      | L | -19.37        | 5.03  | -3.85 | <b>0.009</b> | -14.57        | 5.40  | -2.70 | <b>0.024</b> | -18.86           | 5.97  | -3.16 | <b>0.015</b> | -20.09                  | 6.32  | -3.18 | <b>0.015</b> |
|                            | R | -21.06        | 5.30  | -3.97 | <b>0.009</b> | -16.83        | 5.54  | -3.04 | <b>0.015</b> | -20.48           | 6.22  | -3.29 | <b>0.015</b> | -22.21                  | 6.52  | -3.41 | <b>0.013</b> |
| Medial orbitofrontal       | L | -8.25         | 4.18  | -1.98 | 0.075        | -7.30         | 4.42  | -1.65 | 0.123        | -7.76            | 4.86  | -1.60 | 0.135        | -8.72                   | 5.18  | -1.68 | 0.120        |
|                            | R | -10.01        | 3.96  | -2.53 | <b>0.031</b> | -8.43         | 4.04  | -2.09 | 0.063        | -10.18           | 4.56  | -2.23 | 0.050        | -11.03                  | 4.77  | -2.31 | <b>0.044</b> |
| Paracentral                | L | -7.82         | 3.85  | -2.03 | 0.069        | -8.02         | 3.94  | -2.03 | 0.069        | -8.92            | 4.51  | -1.98 | 0.075        | -9.67                   | 4.61  | -2.10 | 0.062        |
|                            | R | -11.03        | 4.35  | -2.54 | <b>0.031</b> | -10.41        | 4.62  | -2.25 | <b>0.049</b> | -11.86           | 5.10  | -2.33 | 0.042        | -12.79                  | 5.35  | -2.39 | <b>0.037</b> |
| Pars opercularis           | L | -9.47         | 5.57  | -1.70 | 0.116        | -9.93         | 5.66  | -1.75 | 0.109        | -11.16           | 6.38  | -1.75 | 0.109        | -12.23                  | 6.70  | -1.83 | 0.097        |
|                            | R | -12.22        | 4.69  | -2.60 | <b>0.028</b> | -10.59        | 4.84  | -2.19 | 0.053        | -13.16           | 5.42  | -2.43 | <b>0.035</b> | -13.85                  | 5.65  | -2.45 | <b>0.034</b> |
| Pars orbitalis             | L | -4.48         | 1.98  | -2.26 | <b>0.048</b> | -3.89         | 2.07  | -1.88 | 0.087        | -4.45            | 2.33  | -1.91 | 0.083        | -4.87                   | 2.43  | -2.00 | 0.072        |
|                            | R | -6.37         | 2.46  | -2.58 | <b>0.030</b> | -5.49         | 2.49  | -2.20 | 0.052        | -7.07            | 2.76  | -2.56 | <b>0.030</b> | -7.39                   | 2.88  | -2.56 | <b>0.030</b> |
| Pars triangularis          | L | -10.70        | 4.07  | -2.63 | <b>0.027</b> | -8.40         | 4.29  | -1.96 | 0.077        | -9.79            | 4.88  | -2.00 | 0.072        | -10.77                  | 5.03  | -2.14 | 0.057        |
|                            | R | -9.44         | 5.08  | -1.86 | <b>0.091</b> | -7.95         | 5.28  | -1.51 | 0.157        | -9.97            | 5.74  | -1.74 | 0.112        | -10.47                  | 6.13  | -1.71 | 0.116        |
| Precentral                 | L | -26.08        | 9.63  | -2.71 | <b>0.024</b> | -17.49        | 9.96  | -1.76 | 0.109        | -21.00           | 11.51 | -1.82 | 0.097        | -23.24                  | 11.60 | -2.00 | 0.072        |
|                            | R | -30.29        | 9.13  | -3.32 | <b>0.015</b> | -25.29        | 9.40  | -2.69 | <b>0.024</b> | -30.18           | 10.73 | -2.81 | <b>0.021</b> | -32.53                  | 11.12 | -2.92 | <b>0.017</b> |
| Rostral anterior cingulate | L | -7.56         | 3.06  | -2.47 | <b>0.033</b> | -6.23         | 3.19  | -1.95 | 0.077        | -6.81            | 3.62  | -1.88 | 0.087        | -7.68                   | 3.68  | -2.08 | 0.063        |
|                            | R | -8.23         | 2.76  | -2.98 | <b>0.016</b> | -6.43         | 2.98  | -2.16 | 0.056        | -8.18            | 3.26  | -2.51 | <b>0.032</b> | -8.77                   | 3.42  | -2.56 | <b>0.030</b> |
| Rostral middle frontal     | L | -51.06        | 13.35 | -3.82 | <b>0.009</b> | -39.98        | 13.50 | -2.96 | <b>0.016</b> | -48.27           | 15.18 | -3.18 | <b>0.015</b> | -52.48                  | 16.08 | -3.26 | <b>0.015</b> |
|                            | R | -37.09        | 13.06 | -2.84 | <b>0.019</b> | -23.80        | 13.69 | -1.74 | 0.111        | -26.96           | 14.95 | -1.80 | 0.099        | -31.49                  | 15.55 | -2.03 | 0.070        |
| Superior frontal           | L | -54.33        | 15.36 | -3.54 | <b>0.012</b> | -46.65        | 15.87 | -2.94 | <b>0.016</b> | -54.17           | 17.75 | -3.05 | <b>0.015</b> | -59.16                  | 18.59 | -3.18 | <b>0.015</b> |
|                            | R | -48.49        | 15.61 | -3.11 | <b>0.015</b> | -49.41        | 16.03 | -3.08 | <b>0.015</b> | -53.52           | 18.12 | -2.95 | <b>0.016</b> | -58.55                  | 18.89 | -3.10 | <b>0.015</b> |
| Frontal pole               | L | -0.89         | 1.00  | -0.90 | 0.384        | -1.57         | 1.05  | -1.50 | 0.158        | -1.36            | 1.19  | -1.14 | 0.268        | -1.57                   | 1.23  | -1.27 | 0.219        |
|                            | R | -2.77         | 1.26  | -2.20 | 0.052        | -1.99         | 1.35  | -1.48 | 0.164        | -2.10            | 1.50  | -1.40 | 0.183        | -2.52                   | 1.55  | -1.63 | 0.127        |
| <b>Parietal</b>            |   |               |       |       |              |               |       |       |              |                  |       |       |              |                         |       |       |              |
| Inferior parietal          | L | -42.13        | 11.85 | -3.56 | <b>0.012</b> | -35.50        | 12.08 | -2.94 | <b>0.016</b> | -40.47           | 13.38 | -3.02 | <b>0.015</b> | -44.50                  | 14.05 | -3.17 | <b>0.015</b> |
|                            | R | -38.81        | 13.85 | -2.80 | <b>0.021</b> | -30.35        | 13.66 | -2.22 | 0.050        | -38.51           | 15.29 | -2.52 | <b>0.032</b> | -40.26                  | 16.06 | -2.51 | 0.032        |
| Isthmus cingulate          | L | -8.78         | 3.22  | -2.73 | <b>0.024</b> | -6.15         | 3.39  | -1.81 | 0.099        | -7.66            | 3.90  | -1.96 | 0.077        | -8.49                   | 4.01  | -2.11 | 0.060        |
|                            | R | -4.85         | 2.97  | -1.63 | 0.126        | -4.61         | 3.14  | -1.47 | 0.165        | -6.03            | 3.61  | -1.67 | 0.120        | -6.14                   | 3.71  | -1.66 | 0.122        |
| Post central               | L | -29.43        | 9.17  | -3.21 | <b>0.015</b> | -26.17        | 9.67  | -2.71 | <b>0.024</b> | -29.02           | 10.88 | -2.67 | <b>0.025</b> | -32.32                  | 11.22 | -2.88 | <b>0.018</b> |
|                            | R | -27.60        | 8.53  | -3.23 | <b>0.015</b> | -22.81        | 9.22  | -2.48 | <b>0.033</b> | -26.90           | 10.08 | -2.67 | <b>0.025</b> | -29.43                  | 10.58 | -2.78 | <b>0.022</b> |
| Posterior cingulate        | L | -10.66        | 3.45  | -3.09 | <b>0.015</b> | -10.44        | 3.59  | -2.91 | <b>0.017</b> | -12.14           | 4.06  | -2.99 | <b>0.016</b> | -12.94                  | 4.20  | -3.08 | <b>0.015</b> |

|                                   |   | Externalising |       |       |              | Internalising |       |       |              | Thought disorder |       |       |              | General psychopathology |       |       |              |
|-----------------------------------|---|---------------|-------|-------|--------------|---------------|-------|-------|--------------|------------------|-------|-------|--------------|-------------------------|-------|-------|--------------|
|                                   |   | B             | SE    | t     | p(FD<br>R)   | B             | SE    | t     | p(FD<br>R)   | B                | SE    | t     | p(FD<br>R)   | B                       | SE    | t     | p(FD<br>R)   |
|                                   | R | -10.50        | 3.73  | -2.82 | <b>0.020</b> | -8.09         | 4.00  | -2.02 | 0.070        | -9.94            | 4.61  | -2.16 | 0.056        | -10.73                  | 4.73  | -2.27 | <b>0.047</b> |
| Precuneus                         | L | -28.25        | 8.30  | -3.41 | <b>0.013</b> | -22.95        | 8.31  | -2.76 | <b>0.023</b> | -26.81           | 9.31  | -2.88 | <b>0.018</b> | -29.56                  | 9.91  | -2.98 | <b>0.016</b> |
|                                   | R | -26.73        | 8.51  | -3.14 | <b>0.015</b> | -24.60        | 8.65  | -2.84 | <b>0.019</b> | -26.96           | 9.79  | -2.75 | <b>0.023</b> | -29.95                  | 10.13 | -2.96 | <b>0.016</b> |
| Superior parietal                 | L | -27.63        | 10.94 | -2.52 | <b>0.031</b> | -24.76        | 11.24 | -2.20 | 0.052        | -28.24           | 12.62 | -2.24 | <b>0.049</b> | -30.73                  | 13.07 | -2.35 | <b>0.040</b> |
|                                   | R | -27.75        | 11.23 | -2.47 | <b>0.033</b> | -27.65        | 11.50 | -2.41 | <b>0.037</b> | -31.08           | 12.81 | -2.43 | <b>0.035</b> | -33.50                  | 13.25 | -2.53 | <b>0.031</b> |
| Supramarginal                     | L | -32.63        | 11.01 | -2.96 | <b>0.016</b> | -27.43        | 11.08 | -2.48 | <b>0.033</b> | -32.62           | 12.68 | -2.57 | <b>0.030</b> | -35.32                  | 13.49 | -2.62 | <b>0.028</b> |
|                                   | R | -39.01        | 10.17 | -3.84 | <b>0.009</b> | -30.49        | 10.71 | -2.85 | <b>0.019</b> | -37.80           | 12.59 | -3.00 | <b>0.016</b> | -41.00                  | 13.20 | -3.11 | <b>0.015</b> |
| <b>Temporal</b>                   |   |               |       |       |              |               |       |       |              |                  |       |       |              |                         |       |       |              |
| Banks of superior temporal sulcus | L | -3.84         | 3.34  | -1.15 | 0.265        | -1.81         | 3.28  | -0.55 | 0.592        | -1.91            | 3.67  | -0.52 | 0.612        | -2.42                   | 3.80  | -0.64 | 0.537        |
|                                   | R | -4.23         | 2.73  | -1.55 | 0.146        | -1.92         | 2.84  | -0.68 | 0.512        | -3.34            | 3.18  | -1.05 | 0.306        | -3.38                   | 3.31  | -1.02 | 0.318        |
| Entorhinal                        | L | -4.29         | 2.07  | -2.07 | 0.064        | -4.20         | 2.15  | -1.95 | 0.078        | -4.68            | 2.40  | -1.95 | 0.078        | -5.00                   | 2.49  | -2.01 | 0.072        |
|                                   | R | -3.59         | 2.15  | -1.67 | 0.120        | -2.68         | 2.16  | -1.24 | 0.230        | -3.32            | 2.53  | -1.31 | 0.205        | -3.62                   | 2.69  | -1.35 | 0.198        |
| Fusiform                          | L | -23.73        | 8.64  | -2.75 | <b>0.023</b> | -15.36        | 8.88  | -1.73 | 0.112        | -19.82           | 9.97  | -1.99 | 0.074        | -21.53                  | 10.39 | -2.07 | 0.064        |
|                                   | R | -24.76        | 8.08  | -3.06 | <b>0.015</b> | -18.36        | 8.20  | -2.24 | 0.049        | -22.20           | 9.15  | -2.43 | <b>0.035</b> | -24.02                  | 9.57  | -2.51 | 0.032        |
| Inferior temporal                 | L | -28.46        | 10.22 | -2.78 | <b>0.022</b> | -20.57        | 10.74 | -1.91 | 0.083        | -24.37           | 12.00 | -2.03 | 0.069        | -27.07                  | 12.42 | -2.18 | 0.054        |
|                                   | R | -30.45        | 9.25  | -3.29 | <b>0.015</b> | -22.38        | 10.20 | -2.19 | 0.053        | -22.52           | 11.62 | -1.94 | 0.079        | -26.99                  | 11.81 | -2.29 | <b>0.046</b> |
| Middle temporal                   | L | -28.16        | 9.17  | -3.07 | <b>0.015</b> | -23.07        | 9.35  | -2.47 | <b>0.033</b> | -26.94           | 10.42 | -2.59 | <b>0.030</b> | -29.08                  | 10.76 | -2.70 | <b>0.024</b> |
|                                   | R | -33.55        | 9.47  | -3.54 | <b>0.012</b> | -26.71        | 10.06 | -2.66 | <b>0.026</b> | -32.54           | 10.60 | -3.07 | <b>0.015</b> | -34.88                  | 11.33 | -3.08 | <b>0.015</b> |
| Parahippocampal                   | L | -5.31         | 2.36  | -2.25 | <b>0.049</b> | -3.73         | 2.45  | -1.53 | 0.152        | -4.61            | 2.76  | -1.67 | 0.120        | -4.94                   | 2.87  | -1.72 | 0.113        |
|                                   | R | -2.82         | 2.37  | -1.19 | 0.248        | -1.87         | 2.31  | -0.81 | 0.432        | -3.39            | 2.68  | -1.26 | 0.223        | -3.06                   | 2.76  | -1.11 | 0.282        |
| Superior temporal                 | L | -27.75        | 9.20  | -3.02 | <b>0.015</b> | -24.05        | 9.63  | -2.50 | <b>0.032</b> | -26.57           | 10.82 | -2.46 | <b>0.034</b> | -29.54                  | 10.92 | -2.71 | <b>0.024</b> |
|                                   | R | -25.27        | 8.04  | -3.15 | <b>0.015</b> | -22.90        | 8.55  | -2.68 | <b>0.025</b> | -26.19           | 9.67  | -2.71 | <b>0.024</b> | -28.60                  | 9.90  | -2.89 | <b>0.018</b> |
| Temporal pole                     | L | -4.60         | 1.97  | -2.33 | 0.042        | -5.06         | 2.14  | -2.36 | 0.039        | -5.52            | 2.32  | -2.38 | <b>0.038</b> | -6.00                   | 2.39  | -2.51 | <b>0.032</b> |
|                                   | R | -0.40         | 1.92  | -0.21 | 0.840        | -0.40         | 2.02  | -0.20 | 0.844        | -0.48            | 2.25  | -0.21 | 0.840        | -0.46                   | 2.29  | -0.20 | 0.844        |
| Transverse temporal               | L | -2.67         | 1.47  | -1.81 | 0.099        | -2.49         | 1.44  | -1.73 | 0.112        | -2.39            | 1.65  | -1.44 | 0.171        | -2.85                   | 1.74  | -1.64 | 0.126        |
|                                   | R | -2.33         | 1.15  | -2.03 | 0.069        | -2.88         | 1.18  | -2.44 | <b>0.034</b> | -3.03            | 1.32  | -2.29 | <b>0.046</b> | -3.31                   | 1.38  | -2.39 | <b>0.037</b> |
| <b>Occipital</b>                  |   |               |       |       |              |               |       |       |              |                  |       |       |              |                         |       |       |              |
| Cuneus                            | L | -5.12         | 3.05  | -1.68 | 0.120        | -4.65         | 3.16  | -1.47 | 0.164        | -4.86            | 3.63  | -1.34 | 0.199        | -5.57                   | 3.75  | -1.48 | 0.162        |
|                                   | R | -6.06         | 3.38  | -1.79 | 0.101        | -4.74         | 3.58  | -1.32 | 0.203        | -4.83            | 4.06  | -1.19 | 0.248        | -5.74                   | 4.26  | -1.35 | 0.197        |
| Lateral occipital                 | L | -25.58        | 9.30  | -2.75 | <b>0.023</b> | -20.66        | 9.72  | -2.12 | 0.059        | -24.83           | 11.12 | -2.23 | 0.050        | -27.08                  | 11.43 | -2.37 | <b>0.039</b> |
|                                   | R | -29.18        | 9.55  | -3.05 | 0.015        | -23.16        | 9.79  | -2.36 | 0.039        | -29.01           | 11.32 | -2.56 | 0.030        | -30.54                  | 11.67 | -2.62 | <b>0.028</b> |
| Lingual                           | L | -9.83         | 6.29  | -1.56 | 0.142        | -8.13         | 6.56  | -1.24 | 0.230        | -10.22           | 7.43  | -1.38 | 0.190        | -10.77                  | 7.68  | -1.40 | 0.183        |
|                                   | R | -13.17        | 6.12  | -2.15 | 0.056        | -10.25        | 6.36  | -1.61 | 0.131        | -13.29           | 7.36  | -1.81 | 0.099        | -14.15                  | 7.47  | -1.89 | 0.086        |
| Perical carine                    | L | -3.44         | 2.30  | -1.50 | 0.159        | -3.96         | 2.38  | -1.66 | 0.122        | -4.51            | 2.70  | -1.67 | 0.120        | -4.82                   | 2.83  | -1.70 | 0.116        |
|                                   | R | -4.44         | 2.38  | -1.86 | 0.090        | -3.46         | 2.52  | -1.37 | 0.191        | -4.81            | 2.80  | -1.72 | 0.114        | -4.99                   | 2.99  | -1.67 | 0.120        |
| Insula                            | L | -14.85        | 4.17  | -3.57 | <i>0.012</i> | -14.74        | 4.32  | -3.41 | <b>0.013</b> | -16.75           | 4.82  | -3.48 | <b>0.013</b> | -17.96                  | 5.03  | -3.57 | <b>0.012</b> |
|                                   | R | -14.33        | 4.28  | -3.35 | <i>0.014</i> | -13.54        | 4.44  | -3.05 | <b>0.015</b> | -17.17           | 4.87  | -3.52 | <b>0.012</b> | -17.52                  | 5.21  | -3.36 | <b>0.014</b> |
| <b>Subcortical</b>                |   |               |       |       |              |               |       |       |              |                  |       |       |              |                         |       |       |              |
| Cerebellum                        | L | -36.14        | 24.32 | -1.49 | 0.326        | -11.14        | 25.32 | -0.44 | 0.670        | -27.42           | 29.11 | -0.94 | 0.462        | -26.71                  | 29.93 | -0.89 | 0.467        |
|                                   | R | -33.83        | 25.16 | -1.34 | 0.337        | -7.55         | 25.98 | -0.29 | 0.772        | -21.73           | 29.68 | -0.73 | 0.504        | -21.58                  | 30.32 | -0.71 | 0.508        |

|                 |   | Externalising |      |       |         | Internalising |      |       |         | Thought disorder |      |       |         | General psychopathology |      |       |         |
|-----------------|---|---------------|------|-------|---------|---------------|------|-------|---------|------------------|------|-------|---------|-------------------------|------|-------|---------|
|                 |   | B             | SE   | t     | p(FD R) | B             | SE   | t     | p(FD R) | B                | SE   | t     | p(FD R) | B                       | SE   | t     | p(FD R) |
| Thalamus proper | L | -9.36         | 3.46 | -2.70 | 0.148   | -6.54         | 3.71 | -1.76 | 0.251   | -8.03            | 4.15 | -1.93 | 0.233   | -8.88                   | 4.24 | -2.10 | 0.233   |
|                 | R | -6.10         | 3.31 | -1.84 | 0.233   | -4.91         | 3.51 | -1.40 | 0.333   | -6.05            | 3.89 | -1.55 | 0.297   | -6.51                   | 4.03 | -1.62 | 0.285   |
| Caudate         | L | -5.07         | 2.75 | -1.85 | 0.233   | -2.94         | 2.88 | -1.02 | 0.419   | -3.70            | 3.32 | -1.11 | 0.388   | -4.14                   | 3.48 | -1.19 | 0.376   |
|                 | R | -5.71         | 2.84 | -2.01 | 0.233   | -3.72         | 2.93 | -1.27 | 0.351   | -4.23            | 3.34 | -1.26 | 0.351   | -4.80                   | 3.52 | -1.37 | 0.337   |
| Putamen         | L | -4.02         | 3.44 | -1.17 | 0.378   | -3.01         | 3.66 | -0.82 | 0.486   | -4.62            | 4.09 | -1.13 | 0.388   | -4.55                   | 4.27 | -1.06 | 0.409   |
|                 | R | -3.15         | 3.01 | -1.05 | 0.412   | -2.36         | 3.21 | -0.73 | 0.504   | -3.19            | 3.58 | -0.89 | 0.467   | -3.34                   | 3.74 | -0.89 | 0.467   |
| Pallidum        | L | -1.62         | 1.28 | -1.26 | 0.351   | -1.04         | 1.28 | -0.81 | 0.486   | -0.99            | 1.50 | -0.66 | 0.537   | -1.26                   | 1.55 | -0.81 | 0.486   |
|                 | R | -0.78         | 0.99 | -0.79 | 0.494   | -0.60         | 1.03 | -0.58 | 0.580   | -0.97            | 1.17 | -0.82 | 0.486   | -0.92                   | 1.23 | -0.75 | 0.504   |
| Hippocampus     | L | -4.94         | 2.09 | -2.36 | 0.173   | -4.09         | 2.18 | -1.88 | 0.233   | -4.42            | 2.49 | -1.78 | 0.251   | -4.94                   | 2.52 | -1.96 | 0.233   |
|                 | R | -5.39         | 1.98 | -2.73 | 0.148   | -5.75         | 2.16 | -2.66 | 0.148   | -5.84            | 2.41 | -2.42 | 0.173   | -6.44                   | 2.47 | -2.61 | 0.148   |
| Amygdala        | L | -1.37         | 1.06 | -1.29 | 0.351   | -1.53         | 1.13 | -1.35 | 0.337   | -1.40            | 1.24 | -1.13 | 0.388   | -1.56                   | 1.29 | -1.21 | 0.371   |
|                 | R | -2.11         | 1.06 | -1.99 | 0.233   | -2.21         | 1.12 | -1.98 | 0.233   | -2.10            | 1.27 | -1.65 | 0.285   | -2.43                   | 1.30 | -1.87 | 0.233   |
| Accumbens area  | L | -1.31         | 0.56 | -2.35 | 0.173   | -0.83         | 0.58 | -1.44 | 0.333   | -0.95            | 0.66 | -1.44 | 0.333   | -1.09                   | 0.68 | -1.59 | 0.285   |
|                 | R | -1.06         | 0.50 | -2.10 | 0.233   | -0.82         | 0.51 | -1.61 | 0.285   | -0.81            | 0.57 | -1.41 | 0.333   | -0.97                   | 0.59 | -1.63 | 0.285   |

**Table S10:** The relationship between surface area and psychopathology controlling for parental education, income and maternal psychopathology in the ABCD Study (n=10,858)

|                            |   | Externalising |      |       |              | Internalising |      |       |              | Thought disorder |      |       |              | General psychopathology |      |       |              |
|----------------------------|---|---------------|------|-------|--------------|---------------|------|-------|--------------|------------------|------|-------|--------------|-------------------------|------|-------|--------------|
|                            |   | B             | SE   | t     | p(FD R)      | B             | SE   | t     | p(FD R)      | B                | SE   | t     | p(FD R)      | B                       | SE   | t     | p(FD R)      |
| <b>Frontal</b>             |   |               |      |       |              |               |      |       |              |                  |      |       |              |                         |      |       |              |
| Caudal anterior cingulate  | L | -1.90         | 0.90 | -2.12 | 0.051        | -1.41         | 0.90 | -1.56 | 0.137        | -1.67            | 1.04 | -1.60 | 0.128        | -1.85                   | 1.09 | -1.71 | 0.109        |
|                            | R | -3.10         | 0.91 | -3.39 | <b>0.008</b> | -2.23         | 0.98 | -2.27 | <b>0.037</b> | -2.92            | 1.10 | -2.65 | <b>0.020</b> | -3.10                   | 1.13 | -2.74 | <b>0.018</b> |
| Caudal middle frontal      | L | -5.28         | 2.36 | -2.24 | <b>0.040</b> | -4.26         | 2.39 | -1.78 | 0.096        | -5.00            | 2.71 | -1.84 | 0.084        | -5.44                   | 2.82 | -1.93 | 0.073        |
|                            | R | -6.14         | 2.41 | -2.54 | <b>0.025</b> | -5.48         | 2.59 | -2.11 | 0.051        | -5.99            | 2.88 | -2.08 | 0.055        | -6.71                   | 3.00 | -2.24 | <b>0.040</b> |
| Lateral orbitofrontal      | L | -5.51         | 1.54 | -3.57 | <b>0.007</b> | -3.89         | 1.65 | -2.36 | <b>0.033</b> | -5.15            | 1.82 | -2.83 | <b>0.014</b> | -5.49                   | 1.92 | -2.86 | <b>0.014</b> |
|                            | R | -5.67         | 1.64 | -3.45 | <b>0.008</b> | -4.26         | 1.72 | -2.47 | <b>0.027</b> | -5.33            | 1.94 | -2.74 | <b>0.018</b> | -5.79                   | 2.01 | -2.88 | <b>0.014</b> |
| Medial orbitofrontal       | L | -2.66         | 1.33 | -2.01 | 0.063        | -2.13         | 1.35 | -1.58 | 0.133        | -2.51            | 1.56 | -1.61 | 0.128        | -2.75                   | 1.62 | -1.70 | 0.109        |
|                            | R | -3.37         | 1.13 | -2.99 | <b>0.012</b> | -2.68         | 1.15 | -2.34 | <b>0.034</b> | -3.31            | 1.33 | -2.49 | <b>0.026</b> | -3.57                   | 1.36 | -2.62 | <b>0.021</b> |
| Paracentral                | L | -2.37         | 1.13 | -2.09 | 0.054        | -2.47         | 1.15 | -2.16 | <b>0.047</b> | -2.75            | 1.31 | -2.10 | 0.052        | -2.98                   | 1.34 | -2.22 | <b>0.041</b> |
|                            | R | -3.58         | 1.33 | -2.70 | <b>0.019</b> | -3.28         | 1.39 | -2.35 | <b>0.033</b> | -3.68            | 1.58 | -2.33 | <b>0.034</b> | -4.04                   | 1.64 | -2.47 | <b>0.027</b> |
| Pars opercularis           | L | -3.93         | 1.57 | -2.51 | <b>0.026</b> | -3.83         | 1.60 | -2.39 | <b>0.031</b> | -4.38            | 1.82 | -2.40 | <b>0.030</b> | -4.79                   | 1.88 | -2.55 | <b>0.024</b> |
|                            | R | -4.38         | 1.45 | -3.02 | <b>0.012</b> | -3.75         | 1.47 | -2.55 | <b>0.024</b> | -4.75            | 1.66 | -2.87 | <b>0.014</b> | -4.97                   | 1.73 | -2.88 | <b>0.014</b> |
| Pars orbitalis             | L | -1.41         | 0.45 | -3.13 | <b>0.010</b> | -1.05         | 0.46 | -2.27 | <b>0.037</b> | -1.26            | 0.53 | -2.39 | <b>0.031</b> | -1.39                   | 0.55 | -2.53 | <b>0.025</b> |
|                            | R | -1.64         | 0.57 | -2.88 | <b>0.014</b> | -1.32         | 0.58 | -2.26 | <b>0.038</b> | -1.68            | 0.64 | -2.64 | <b>0.020</b> | -1.78                   | 0.67 | -2.66 | <b>0.020</b> |
| Pars triangularis          | L | -3.51         | 1.13 | -3.12 | <b>0.010</b> | -2.79         | 1.19 | -2.33 | <b>0.034</b> | -3.43            | 1.36 | -2.53 | <b>0.025</b> | -3.67                   | 1.41 | -2.61 | <b>0.022</b> |
|                            | R | -3.72         | 1.44 | -2.59 | <b>0.022</b> | -2.95         | 1.48 | -1.99 | 0.065        | -3.77            | 1.63 | -2.32 | <b>0.035</b> | -3.95                   | 1.72 | -2.29 | <b>0.036</b> |
| Precentral                 | L | -8.76         | 3.06 | -2.87 | <b>0.014</b> | -6.36         | 3.16 | -2.01 | 0.062        | -7.27            | 3.59 | -2.02 | 0.061        | -8.18                   | 3.65 | -2.24 | <b>0.040</b> |
|                            | R | -9.55         | 3.06 | -3.12 | <b>0.010</b> | -8.37         | 3.21 | -2.61 | <b>0.022</b> | -9.60            | 3.62 | -2.65 | <b>0.020</b> | -10.50                  | 3.78 | -2.78 | <b>0.016</b> |
| Rostral anterior cingulate | L | -2.20         | 0.82 | -2.66 | <b>0.020</b> | -1.82         | 0.87 | -2.10 | 0.053        | -2.12            | 0.97 | -2.20 | <b>0.043</b> | -2.34                   | 1.00 | -2.35 | <b>0.033</b> |
|                            | R | -2.43         | 0.73 | -3.34 | <b>0.008</b> | -1.88         | 0.80 | -2.35 | <b>0.033</b> | -2.44            | 0.87 | -2.82 | <b>0.014</b> | -2.60                   | 0.91 | -2.84 | <b>0.014</b> |
| Rostral middle frontal     | L | -17.10        | 4.10 | -4.17 | <b>0.003</b> | -11.91        | 4.36 | -2.73 | <b>0.018</b> | -15.11           | 4.92 | -3.07 | <b>0.011</b> | -16.38                  | 5.08 | -3.22 | <b>0.009</b> |
|                            | R | -14.96        | 4.25 | -3.52 | <b>0.008</b> | -8.96         | 4.47 | -2.00 | 0.063        | -10.85           | 4.95 | -2.19 | <b>0.044</b> | -12.41                  | 5.02 | -2.47 | <b>0.027</b> |
| Superior frontal           | L | -19.11        | 4.39 | -4.35 | <b>0.003</b> | -15.90        | 4.73 | -3.36 | <b>0.008</b> | -18.92           | 5.25 | -3.61 | <b>0.007</b> | -20.53                  | 5.48 | -3.75 | <b>0.005</b> |
|                            | R | -17.11        | 4.63 | -3.70 | <b>0.005</b> | -15.95        | 4.80 | -3.32 | <b>0.008</b> | -17.96           | 5.55 | -3.24 | <b>0.009</b> | -19.60                  | 5.68 | -3.45 | <b>0.008</b> |
| Frontal pole               | L | -0.35         | 0.20 | -1.81 | 0.089        | -0.38         | 0.20 | -1.87 | 0.080        | -0.37            | 0.23 | -1.61 | 0.128        | -0.42                   | 0.24 | -1.74 | <b>0.103</b> |
|                            | R | -0.66         | 0.26 | -2.50 | <b>0.026</b> | -0.44         | 0.28 | -1.53 | 0.146        | -0.47            | 0.31 | -1.54 | 0.144        | -0.56                   | 0.33 | -1.69 | 0.112        |
| <b>Parietal</b>            |   |               |      |       |              |               |      |       |              |                  |      |       |              |                         |      |       |              |
| Inferior parietal          | L | -12.33        | 3.67 | -3.36 | <b>0.008</b> | -10.05        | 3.77 | -2.66 | <b>0.020</b> | -11.56           | 4.09 | -2.83 | <b>0.014</b> | -12.78                  | 4.34 | -2.94 | <b>0.013</b> |
|                            | R | -12.44        | 4.21 | -2.95 | <b>0.013</b> | -10.08        | 4.18 | -2.41 | <b>0.030</b> | -12.29           | 4.65 | -2.65 | <b>0.020</b> | -13.08                  | 4.86 | -2.69 | <b>0.019</b> |
| Isthmus cingulate          | L | -3.20         | 1.07 | -3.01 | <b>0.012</b> | -2.18         | 1.14 | -1.90 | 0.076        | -2.84            | 1.30 | -2.19 | <b>0.044</b> | -3.09                   | 1.35 | -2.29 | <b>0.036</b> |
|                            | R | -1.38         | 0.91 | -1.52 | 0.146        | -1.07         | 0.95 | -1.12 | 0.276        | -1.46            | 1.12 | -1.31 | 0.207        | -1.51                   | 1.13 | -1.33 | 0.200        |
| Post central               | L | -11.07        | 2.86 | -3.86 | <b>0.004</b> | -9.60         | 2.99 | -3.21 | <b>0.009</b> | -10.63           | 3.41 | -3.12 | <b>0.010</b> | -11.93                  | 3.48 | -3.43 | <b>0.008</b> |
|                            | R | -10.13        | 2.65 | -3.82 | <b>0.004</b> | -8.24         | 2.92 | -2.83 | <b>0.014</b> | -9.63            | 3.23 | -2.98 | <b>0.012</b> | -10.61                  | 3.36 | -3.16 | <b>0.010</b> |
| Posterior cingulate        | L | -3.73         | 1.09 | -3.43 | <b>0.008</b> | -3.53         | 1.12 | -3.15 | <b>0.010</b> | -4.15            | 1.25 | -3.32 | <b>0.008</b> | -4.42                   | 1.30 | -3.41 | <b>0.008</b> |
|                            | R | -3.63         | 1.19 | -3.04 | <b>0.011</b> | -2.72         | 1.27 | -2.15 | <b>0.048</b> | -3.44            | 1.49 | -2.31 | <b>0.035</b> | -3.69                   | 1.52 | -2.43 | <b>0.029</b> |
| Precuneus                  | L | -10.51        | 2.63 | -3.99 | <b>0.004</b> | -8.31         | 2.69 | -3.09 | <b>0.011</b> | -9.77            | 3.03 | -3.23 | <b>0.009</b> | -10.79                  | 3.21 | -3.36 | <b>0.008</b> |

|                                   |   | Externalising |      |       |              | Internalising |      |       |              | Thought disorder |      |       |              | General psychopathology |      |       |              |
|-----------------------------------|---|---------------|------|-------|--------------|---------------|------|-------|--------------|------------------|------|-------|--------------|-------------------------|------|-------|--------------|
|                                   |   | B             | SE   | t     | p(FD R)      | B             | SE   | t     | p(FD R)      | B                | SE   | t     | p(FD R)      | B                       | SE   | t     | p(FD R)      |
|                                   | R | -9.81         | 2.86 | -3.43 | <b>0.008</b> | -8.83         | 3.00 | -2.94 | <b>0.013</b> | -10.14           | 3.36 | -3.02 | <b>0.012</b> | -11.10                  | 3.49 | -3.18 | <b>0.010</b> |
| Superior parietal                 | L | -10.62        | 3.68 | -2.89 | <b>0.014</b> | -9.30         | 3.79 | -2.45 | <b>0.028</b> | -10.41           | 4.25 | -2.45 | <b>0.028</b> | -11.54                  | 4.37 | -2.64 | <b>0.020</b> |
|                                   | R | -9.53         | 3.68 | -2.59 | <b>0.022</b> | -9.69         | 3.77 | -2.57 | <b>0.023</b> | -10.83           | 4.23 | -2.56 | <b>0.024</b> | -11.74                  | 4.36 | -2.69 | <b>0.019</b> |
| Supramarginal                     | L | -11.03        | 3.38 | -3.27 | <b>0.009</b> | -9.34         | 3.35 | -2.79 | <b>0.016</b> | -10.87           | 3.86 | -2.82 | <b>0.014</b> | -11.89                  | 4.07 | -2.92 | <b>0.013</b> |
|                                   | R | -12.41        | 3.10 | -4.00 | <b>0.004</b> | -9.72         | 3.35 | -2.90 | <b>0.013</b> | -11.72           | 3.92 | -2.99 | <b>0.012</b> | -12.93                  | 4.04 | -3.20 | <b>0.009</b> |
| <b>Temporal</b>                   |   |               |      |       |              |               |      |       |              |                  |      |       |              |                         |      |       |              |
| Banks of superior temporal sulcus | L | -1.37         | 1.12 | -1.22 | 0.238        | -0.54         | 1.08 | -0.50 | 0.614        | -0.91            | 1.23 | -0.74 | 0.460        | -0.96                   | 1.26 | -0.76 | 0.454        |
|                                   | R | -1.66         | 0.86 | -1.92 | 0.073        | -0.96         | 0.89 | -1.08 | 0.294        | -1.44            | 0.99 | -1.45 | 0.167        | -1.48                   | 1.04 | -1.43 | 0.173        |
| Entorhinal                        | L | -0.71         | 0.45 | -1.60 | 0.128        | -0.52         | 0.46 | -1.12 | 0.276        | -0.68            | 0.53 | -1.29 | 0.213        | -0.72                   | 0.54 | -1.35 | 0.196        |
|                                   | R | -0.51         | 0.47 | -1.10 | 0.285        | -0.41         | 0.49 | -0.84 | 0.406        | -0.49            | 0.55 | -0.89 | 0.380        | -0.54                   | 0.59 | -0.93 | 0.366        |
| Fusiform                          | L | -6.59         | 2.25 | -2.93 | <b>0.013</b> | -4.42         | 2.30 | -1.92 | 0.073        | -5.56            | 2.61 | -2.13 | 0.050        | -6.08                   | 2.74 | -2.22 | <b>0.042</b> |
|                                   | R | -6.96         | 2.13 | -3.27 | <b>0.009</b> | -5.00         | 2.18 | -2.29 | <b>0.036</b> | -5.79            | 2.47 | -2.35 | <b>0.033</b> | -6.46                   | 2.57 | -2.51 | <b>0.025</b> |
| Inferior temporal                 | L | -7.79         | 2.55 | -3.05 | <b>0.011</b> | -5.60         | 2.70 | -2.07 | 0.055        | -7.00            | 3.04 | -2.30 | <b>0.035</b> | -7.61                   | 3.14 | -2.42 | <b>0.029</b> |
|                                   | R | -8.94         | 2.27 | -3.93 | <b>0.004</b> | -6.60         | 2.51 | -2.63 | <b>0.021</b> | -7.01            | 2.81 | -2.50 | <b>0.026</b> | -8.17                   | 2.93 | -2.79 | <b>0.015</b> |
| Middle temporal                   | L | -7.86         | 2.23 | -3.52 | <b>0.008</b> | -5.65         | 2.25 | -2.52 | <b>0.025</b> | -7.45            | 2.55 | -2.92 | <b>0.013</b> | -7.84                   | 2.63 | -2.98 | <b>0.012</b> |
|                                   | R | -9.78         | 2.36 | -4.15 | <b>0.003</b> | -7.10         | 2.51 | -2.83 | <b>0.014</b> | -8.91            | 2.72 | -3.27 | <b>0.009</b> | -9.59                   | 2.86 | -3.35 | <b>0.008</b> |
| Parahippocampal                   | L | -1.41         | 0.69 | -2.03 | 0.061        | -1.15         | 0.74 | -1.56 | 0.137        | -1.36            | 0.85 | -1.61 | 0.128        | -1.47                   | 0.87 | -1.68 | 0.112        |
|                                   | R | -1.01         | 0.74 | -1.36 | 0.193        | -0.69         | 0.74 | -0.93 | 0.362        | -1.11            | 0.86 | -1.29 | 0.213        | -1.07                   | 0.89 | -1.21 | 0.243        |
| Superior temporal                 | L | -9.59         | 2.46 | -3.90 | <b>0.004</b> | -7.60         | 2.53 | -3.00 | <b>0.012</b> | -8.78            | 2.88 | -3.05 | <b>0.011</b> | -9.72                   | 2.99 | -3.25 | <b>0.009</b> |
|                                   | R | -8.29         | 2.15 | -3.85 | <b>0.004</b> | -6.71         | 2.25 | -2.98 | <b>0.012</b> | -8.22            | 2.64 | -3.11 | <b>0.010</b> | -8.86                   | 2.70 | -3.28 | <b>0.009</b> |
| Temporal pole                     | L | -0.94         | 0.33 | -2.90 | <b>0.013</b> | -0.83         | 0.34 | -2.47 | <b>0.027</b> | -0.95            | 0.38 | -2.49 | <b>0.026</b> | -1.04                   | 0.39 | -2.65 | <b>0.020</b> |
|                                   | R | -0.29         | 0.32 | -0.91 | 0.372        | -0.32         | 0.35 | -0.94 | 0.362        | -0.29            | 0.38 | -0.75 | 0.455        | -0.34                   | 0.40 | -0.84 | 0.406        |
| Transverse temporal               | L | -0.92         | 0.43 | -2.13 | 0.050        | -0.71         | 0.43 | -1.66 | 0.116        | -0.72            | 0.49 | -1.46 | 0.164        | -0.87                   | 0.51 | -1.68 | 0.112        |
|                                   | R | -0.58         | 0.31 | -1.89 | 0.077        | -0.59         | 0.32 | -1.87 | 0.080        | -0.65            | 0.36 | -1.84 | 0.085        | -0.72                   | 0.37 | -1.96 | 0.069        |
| <b>Occipital</b>                  |   |               |      |       |              |               |      |       |              |                  |      |       |              |                         |      |       |              |
| Cuneus                            | L | -2.54         | 1.10 | -2.30 | <b>0.035</b> | -2.10         | 1.13 | -1.86 | 0.082        | -2.49            | 1.30 | -1.91 | 0.075        | -2.71                   | 1.38 | -1.97 | 0.067        |
|                                   | R | -2.98         | 1.22 | -2.44 | <b>0.029</b> | -2.18         | 1.25 | -1.74 | 0.103        | -2.62            | 1.39 | -1.88 | 0.079        | -2.90                   | 1.48 | -1.96 | 0.069        |
| Lateral occipital                 | L | -9.32         | 3.12 | -2.99 | <b>0.012</b> | -7.63         | 3.20 | -2.38 | <b>0.031</b> | -9.46            | 3.76 | -2.52 | 0.025        | -10.18                  | 3.85 | -2.65 | <b>0.020</b> |
|                                   | R | -9.57         | 3.15 | -3.04 | <b>0.011</b> | -7.43         | 3.23 | -2.30 | <b>0.035</b> | -9.28            | 3.83 | -2.43 | 0.029        | -9.88                   | 3.93 | -2.51 | <b>0.025</b> |
| Lingual                           | L | -3.82         | 2.22 | -1.72 | 0.106        | -2.76         | 2.36 | -1.17 | 0.258        | -3.75            | 2.68 | -1.40 | 0.180        | -3.89                   | 2.78 | -1.40 | 0.180        |
|                                   | R | -4.89         | 2.11 | -2.31 | 0.035        | -2.80         | 2.22 | -1.26 | 0.222        | -4.43            | 2.60 | -1.70 | 0.109        | -4.59                   | 2.63 | -1.74 | 0.103        |
| Perical carine                    | L | -2.04         | 1.24 | -1.64 | 0.121        | -1.46         | 1.30 | -1.12 | 0.276        | -2.15            | 1.48 | -1.45 | 0.166        | -2.21                   | 1.55 | -1.42 | 0.175        |
|                                   | R | -3.02         | 1.26 | -2.40 | <b>0.030</b> | -1.87         | 1.32 | -1.42 | 0.175        | -3.10            | 1.51 | -2.05 | 0.057        | -3.07                   | 1.59 | -1.93 | 0.072        |
| Insula                            | L | -4.03         | 1.21 | -3.34 | <b>0.008</b> | -4.07         | 1.32 | -3.09 | <b>0.011</b> | -4.65            | 1.48 | -3.15 | 0.010        | -4.96                   | 1.53 | -3.24 | <b>0.009</b> |
|                                   | R | -3.77         | 1.32 | -2.87 | <b>0.014</b> | -3.60         | 1.39 | -2.60 | <b>0.022</b> | -4.68            | 1.54 | -3.04 | 0.011        | -4.74                   | 1.63 | -2.91 | <b>0.013</b> |

**Table S11:** The relationship between gray matter volume and psychopathology controlling for parental education, income, maternal psychopathology and cognition in the ABCD Study (n=10,858)

|                            |   | Externalising |       |       |         | Internalising |       |       |         | Thought disorder |       |       |         | General psychopathology |       |       |         |
|----------------------------|---|---------------|-------|-------|---------|---------------|-------|-------|---------|------------------|-------|-------|---------|-------------------------|-------|-------|---------|
|                            |   | B             | SE    | t     | p(FD R) | B             | SE    | t     | p(FD R) | B                | SE    | t     | p(FD R) | B                       | SE    | t     | p(FD R) |
| <b>Frontal</b>             |   |               |       |       |         |               |       |       |         |                  |       |       |         |                         |       |       |         |
| Caudal anterior cingulate  | L | -5.46         | 3.46  | -1.58 | 0.173   | -4.31         | 3.61  | -1.20 | 0.272   | -4.81            | 4.19  | -1.15 | 0.284   | -5.38                   | 4.33  | -1.24 | 0.260   |
|                            | R | -9.82         | 3.52  | -2.79 | 0.051   | -7.17         | 3.67  | -1.95 | 0.097   | -9.37            | 4.19  | -2.24 | 0.071   | -9.81                   | 4.27  | -2.30 | 0.069   |
| Caudal middle frontal      | L | -10.44        | 8.44  | -1.24 | 0.261   | -8.93         | 8.72  | -1.02 | 0.330   | -10.03           | 9.74  | -1.03 | 0.329   | -10.98                  | 10.08 | -1.09 | 0.305   |
|                            | R | -17.72        | 8.71  | -2.03 | 0.086   | -15.59        | 9.20  | -1.70 | 0.143   | -17.40           | 10.07 | -1.73 | 0.135   | -19.42                  | 10.55 | -1.84 | 0.115   |
| Lateral orbitofrontal      | L | -17.57        | 5.28  | -3.33 | 0.049   | -13.69        | 5.70  | -2.40 | 0.062   | -17.32           | 6.31  | -2.75 | 0.051   | -18.54                  | 6.70  | -2.77 | 0.051   |
|                            | R | -19.32        | 5.56  | -3.47 | 0.049   | -15.65        | 5.88  | -2.66 | 0.052   | -18.55           | 6.59  | -2.81 | 0.051   | -20.28                  | 6.88  | -2.95 | 0.051   |
| Medial orbitofrontal       | L | -7.87         | 4.28  | -1.84 | 0.115   | -6.74         | 4.61  | -1.46 | 0.199   | -7.26            | 4.99  | -1.46 | 0.200   | -8.15                   | 5.30  | -1.54 | 0.182   |
|                            | R | -8.76         | 4.08  | -2.15 | 0.077   | -7.37         | 4.17  | -1.77 | 0.128   | -8.84            | 4.71  | -1.88 | 0.110   | -9.62                   | 4.89  | -1.97 | 0.095   |
| Paracentral                | L | -8.22         | 4.03  | -2.04 | 0.086   | -7.79         | 4.17  | -1.87 | 0.111   | -9.07            | 4.78  | -1.90 | 0.107   | -9.73                   | 4.87  | -2.00 | 0.089   |
|                            | R | -11.00        | 4.59  | -2.40 | 0.062   | -10.16        | 4.85  | -2.09 | 0.080   | -11.47           | 5.39  | -2.13 | 0.079   | -12.45                  | 5.67  | -2.20 | 0.074   |
| Pars opercularis           | L | -7.11         | 5.82  | -1.22 | 0.264   | -8.89         | 5.88  | -1.51 | 0.189   | -9.54            | 6.69  | -1.42 | 0.208   | -10.47                  | 7.01  | -1.49 | 0.193   |
|                            | R | -11.95        | 4.94  | -2.42 | 0.062   | -10.78        | 5.12  | -2.10 | 0.080   | -13.36           | 5.74  | -2.33 | 0.067   | -14.00                  | 5.97  | -2.34 | 0.067   |
| Pars orbitalis             | L | -3.69         | 2.09  | -1.77 | 0.128   | -3.57         | 2.15  | -1.66 | 0.151   | -3.88            | 2.44  | -1.59 | 0.170   | -4.27                   | 2.54  | -1.68 | 0.147   |
|                            | R | -5.73         | 2.57  | -2.23 | 0.072   | -5.22         | 2.59  | -2.01 | 0.088   | -6.67            | 2.87  | -2.33 | 0.067   | -6.95                   | 2.99  | -2.32 | 0.067   |
| Pars triangularis          | L | -9.73         | 4.28  | -2.27 | 0.070   | -7.68         | 4.51  | -1.70 | 0.141   | -9.07            | 5.08  | -1.79 | 0.126   | -9.88                   | 5.21  | -1.90 | 0.107   |
|                            | R | -8.01         | 5.35  | -1.50 | 0.193   | -7.16         | 5.60  | -1.28 | 0.247   | -9.01            | 6.11  | -1.48 | 0.196   | -9.38                   | 6.50  | -1.44 | 0.204   |
| Precentral                 | L | -21.54        | 10.01 | -2.15 | 0.077   | -13.75        | 10.54 | -1.30 | 0.241   | -16.07           | 12.11 | -1.33 | 0.235   | -18.08                  | 12.13 | -1.49 | 0.193   |
|                            | R | -26.58        | 9.61  | -2.77 | 0.051   | -22.73        | 9.89  | -2.30 | 0.069   | -26.49           | 11.30 | -2.35 | 0.067   | -28.76                  | 11.65 | -2.47 | 0.060   |
| Rostral anterior cingulate | L | -6.95         | 3.20  | -2.17 | 0.075   | -5.95         | 3.30  | -1.80 | 0.123   | -6.20            | 3.79  | -1.64 | 0.157   | -7.10                   | 3.81  | -1.87 | 0.111   |
|                            | R | -7.17         | 2.86  | -2.51 | 0.057   | -5.45         | 3.09  | -1.76 | 0.128   | -7.03            | 3.40  | -2.07 | 0.082   | -7.51                   | 3.60  | -2.09 | 0.080   |
| Rostral middle frontal     | L | -46.85        | 13.63 | -3.44 | 0.049   | -37.39        | 14.03 | -2.67 | 0.052   | -44.12           | 16.01 | -2.75 | 0.051   | -48.39                  | 16.77 | -2.89 | 0.051   |
|                            | R | -30.24        | 13.52 | -2.24 | 0.071   | -19.87        | 14.22 | -1.40 | 0.215   | -20.22           | 15.61 | -1.30 | 0.244   | -24.78                  | 16.06 | -1.54 | 0.182   |
| Superior frontal           | L | -53.24        | 15.79 | -3.37 | 0.049   | -44.22        | 16.64 | -2.66 | 0.052   | -51.10           | 18.64 | -2.74 | 0.051   | -56.47                  | 19.30 | -2.93 | 0.051   |
|                            | R | -46.21        | 15.87 | -2.91 | 0.051   | -46.83        | 16.72 | -2.80 | 0.051   | -49.57           | 18.97 | -2.61 | 0.055   | -55.10                  | 19.41 | -2.84 | 0.051   |
| Frontal pole               | L | -1.00         | 1.05  | -0.95 | 0.362   | -1.64         | 1.08  | -1.53 | 0.185   | -1.41            | 1.23  | -1.15 | 0.284   | -1.65                   | 1.26  | -1.31 | 0.241   |
|                            | R | -2.76         | 1.32  | -2.09 | 0.080   | -2.06         | 1.39  | -1.48 | 0.196   | -2.07            | 1.59  | -1.30 | 0.241   | -2.53                   | 1.63  | -1.55 | 0.180   |
| <b>Parietal</b>            |   |               |       |       |         |               |       |       |         |                  |       |       |         |                         |       |       |         |
| Inferior parietal          | L | -38.57        | 12.25 | -3.15 | 0.051   | -33.63        | 12.78 | -2.63 | 0.053   | -37.71           | 14.08 | -2.68 | 0.052   | -41.49                  | 14.71 | -2.82 | 0.051   |
|                            | R | -31.76        | 14.56 | -2.18 | 0.074   | -25.41        | 14.39 | -1.77 | 0.128   | -33.17           | 16.07 | -2.06 | 0.082   | -33.91                  | 16.87 | -2.01 | 0.089   |
| Isthmus cingulate          | L | -7.55         | 3.38  | -2.24 | 0.071   | -5.03         | 3.55  | -1.42 | 0.210   | -6.07            | 4.09  | -1.49 | 0.194   | -6.88                   | 4.17  | -1.65 | 0.154   |
|                            | R | -3.80         | 3.12  | -1.22 | 0.264   | -3.88         | 3.29  | -1.18 | 0.279   | -5.18            | 3.78  | -1.37 | 0.220   | -5.14                   | 3.85  | -1.34 | 0.232   |
| Post central               | L | -27.73        | 9.59  | -2.89 | 0.051   | -24.53        | 10.03 | -2.45 | 0.062   | -27.16           | 11.56 | -2.35 | 0.067   | -30.43                  | 11.73 | -2.59 | 0.056   |
|                            | R | -25.85        | 8.96  | -2.88 | 0.051   | -21.35        | 9.53  | -2.24 | 0.071   | -25.07           | 10.39 | -2.41 | 0.062   | -27.48                  | 10.90 | -2.52 | 0.057   |
| Posterior cingulate        | L | -9.04         | 3.60  | -2.51 | 0.057   | -9.17         | 3.76  | -2.44 | 0.062   | -10.61           | 4.22  | -2.51 | 0.057   | -11.22                  | 4.35  | -2.58 | 0.056   |
|                            | R | -9.66         | 3.91  | -2.47 | 0.060   | -7.70         | 4.19  | -1.84 | 0.115   | -9.44            | 4.68  | -2.01 | 0.088   | -10.09                  | 4.83  | -2.09 | 0.080   |
| Precuneus                  | L | -25.40        | 8.68  | -2.93 | 0.051   | -21.22        | 8.79  | -2.42 | 0.062   | -23.89           | 9.80  | -2.44 | 0.062   | -26.63                  | 10.38 | -2.56 | 0.057   |

|                                   |   | Externalising |       |       |              | Internalising |       |       |         | Thought disorder |       |       |         | General psychopathology |       |       |         |
|-----------------------------------|---|---------------|-------|-------|--------------|---------------|-------|-------|---------|------------------|-------|-------|---------|-------------------------|-------|-------|---------|
|                                   |   | B             | SE    | t     | p(FD R)      | B             | SE    | t     | p(FD R) | B                | SE    | t     | p(FD R) | B                       | SE    | t     | p(FD R) |
|                                   | R | -23.81        | 8.84  | -2.69 | 0.052        | -22.09        | 9.17  | -2.41 | 0.062   | -23.94           | 10.34 | -2.32 | 0.068   | -26.71                  | 10.58 | -2.53 | 0.057   |
| Superior parietal                 | L | -26.16        | 11.43 | -2.29 | 0.069        | -25.25        | 11.86 | -2.13 | 0.079   | -28.66           | 13.28 | -2.16 | 0.076   | -30.90                  | 13.78 | -2.24 | 0.071   |
|                                   | R | -24.39        | 11.58 | -2.11 | 0.080        | -26.39        | 11.94 | -2.21 | 0.073   | -28.32           | 13.40 | -2.11 | 0.080   | -30.90                  | 13.77 | -2.24 | 0.071   |
| Supramarginal                     | L | -25.80        | 11.45 | -2.25 | 0.071        | -22.84        | 11.69 | -1.95 | 0.097   | -26.91           | 13.30 | -2.02 | 0.088   | -29.01                  | 13.98 | -2.07 | 0.081   |
|                                   | R | -36.03        | 10.53 | -3.42 | <b>0.049</b> | -29.13        | 11.06 | -2.63 | 0.053   | -35.63           | 13.16 | -2.71 | 0.052   | -38.66                  | 13.54 | -2.86 | 0.051   |
| <b>Temporal</b>                   |   |               |       |       |              |               |       |       |         |                  |       |       |         |                         |       |       |         |
| Banks of superior temporal sulcus | L | -2.87         | 3.48  | -0.82 | 0.429        | -0.82         | 3.39  | -0.24 | 0.823   | -0.89            | 3.88  | -0.23 | 0.830   | -1.23                   | 3.94  | -0.31 | 0.773   |
|                                   | R | -3.31         | 2.88  | -1.15 | 0.284        | -0.98         | 2.97  | -0.33 | 0.761   | -2.10            | 3.42  | -0.61 | 0.557   | -2.11                   | 3.49  | -0.60 | 0.563   |
| Entorhinal                        | L | -3.31         | 2.18  | -1.52 | 0.186        | -3.18         | 2.22  | -1.43 | 0.207   | -3.53            | 2.50  | -1.41 | 0.212   | -3.77                   | 2.58  | -1.46 | 0.199   |
|                                   | R | -3.10         | 2.25  | -1.37 | 0.220        | -2.41         | 2.24  | -1.08 | 0.308   | -2.99            | 2.63  | -1.14 | 0.288   | -3.27                   | 2.79  | -1.17 | 0.280   |
| Fusiform                          | L | -19.55        | 8.84  | -2.21 | 0.073        | -14.24        | 9.26  | -1.54 | 0.182   | -18.04           | 10.38 | -1.74 | 0.134   | -19.37                  | 10.70 | -1.81 | 0.121   |
|                                   | R | -21.06        | 8.46  | -2.49 | 0.058        | -17.18        | 8.59  | -2.00 | 0.089   | -20.58           | 9.51  | -2.16 | 0.076   | -21.93                  | 9.96  | -2.20 | 0.073   |
| Inferior temporal                 | L | -27.16        | 10.67 | -2.55 | 0.057        | -19.57        | 11.28 | -1.73 | 0.135   | -22.71           | 12.60 | -1.80 | 0.123   | -25.46                  | 13.02 | -1.95 | 0.097   |
|                                   | R | -26.85        | 9.72  | -2.76 | 0.051        | -20.53        | 10.71 | -1.92 | 0.104   | -19.90           | 12.18 | -1.63 | 0.157   | -24.11                  | 12.37 | -1.95 | 0.097   |
| Middle temporal                   | L | -24.32        | 9.65  | -2.52 | 0.057        | -20.39        | 9.73  | -2.09 | 0.080   | -23.80           | 10.92 | -2.18 | 0.074   | -25.45                  | 11.15 | -2.28 | 0.070   |
|                                   | R | -28.55        | 9.81  | -2.91 | 0.051        | -23.11        | 10.46 | -2.21 | 0.073   | -28.00           | 11.18 | -2.50 | 0.057   | -29.94                  | 11.73 | -2.55 | 0.057   |
| Parahippocampal                   | L | -4.36         | 2.47  | -1.76 | 0.128        | -2.98         | 2.57  | -1.16 | 0.283   | -3.60            | 2.93  | -1.23 | 0.264   | -3.88                   | 3.03  | -1.28 | 0.247   |
|                                   | R | -2.26         | 2.42  | -0.93 | 0.372        | -1.73         | 2.38  | -0.73 | 0.485   | -2.88            | 2.77  | -1.04 | 0.326   | -2.62                   | 2.85  | -0.92 | 0.378   |
| Superior temporal                 | L | -23.13        | 9.52  | -2.43 | 0.062        | -22.04        | 10.06 | -2.19 | 0.074   | -23.54           | 11.31 | -2.08 | 0.081   | -26.07                  | 11.35 | -2.30 | 0.069   |
|                                   | R | -22.59        | 8.45  | -2.67 | 0.052        | -22.75        | 9.09  | -2.50 | 0.057   | -25.17           | 10.32 | -2.44 | 0.062   | -27.34                  | 10.53 | -2.60 | 0.056   |
| Temporal pole                     | L | -4.28         | 2.04  | -2.10 | 0.080        | -4.95         | 2.21  | -2.24 | 0.071   | -5.35            | 2.45  | -2.19 | 0.074   | -5.83                   | 2.49  | -2.34 | 0.067   |
|                                   | R | -0.33         | 2.02  | -0.16 | 0.871        | -0.47         | 2.09  | -0.23 | 0.830   | -0.42            | 2.38  | -0.18 | 0.862   | -0.45                   | 2.39  | -0.19 | 0.859   |
| Transverse temporal               | L | -2.06         | 1.54  | -1.34 | 0.232        | -2.16         | 1.50  | -1.44 | 0.204   | -1.96            | 1.77  | -1.11 | 0.299   | -2.35                   | 1.83  | -1.29 | 0.246   |
|                                   | R | -1.94         | 1.19  | -1.64 | 0.157        | -2.59         | 1.22  | -2.11 | 0.080   | -2.64            | 1.40  | -1.89 | 0.109   | -2.90                   | 1.45  | -2.01 | 0.089   |
| <b>Occipital</b>                  |   |               |       |       |              |               |       |       |         |                  |       |       |         |                         |       |       |         |
| Cuneus                            | L | -3.60         | 3.13  | -1.15 | 0.284        | -4.23         | 3.30  | -1.28 | 0.247   | -3.85            | 3.79  | -1.02 | 0.332   | -4.52                   | 3.91  | -1.16 | 0.284   |
|                                   | R | -4.21         | 3.51  | -1.20 | 0.272        | -4.10         | 3.75  | -1.09 | 0.305   | -3.33            | 4.33  | -0.77 | 0.461   | -4.28                   | 4.48  | -0.96 | 0.362   |
| Lateral occipital                 | L | -22.77        | 9.80  | -2.32 | 0.067        | -18.83        | 10.20 | -1.85 | 0.115   | -21.64           | 11.56 | -1.87 | 0.111   | -24.09                  | 11.84 | -2.03 | 0.086   |
|                                   | R | -27.23        | 10.07 | -2.70 | 0.052        | -21.68        | 10.28 | -2.11 | 0.080   | -26.91           | 11.81 | -2.28 | 0.070   | -28.47                  | 12.15 | -2.34 | 0.067   |
| Lingual                           | L | -8.23         | 6.61  | -1.25 | 0.260        | -6.08         | 6.92  | -0.88 | 0.399   | -8.43            | 7.68  | -1.10 | 0.304   | -8.61                   | 7.92  | -1.09 | 0.305   |
|                                   | R | -11.08        | 6.41  | -1.73 | 0.135        | -9.21         | 6.63  | -1.39 | 0.217   | -11.96           | 7.65  | -1.56 | 0.177   | -12.56                  | 7.70  | -1.63 | 0.157   |
| Perical carine                    | L | -2.45         | 2.41  | -1.02 | 0.332        | -3.47         | 2.49  | -1.40 | 0.215   | -3.79            | 2.84  | -1.34 | 0.232   | -4.03                   | 2.93  | -1.37 | 0.220   |
|                                   | R | -2.92         | 2.49  | -1.17 | 0.280        | -2.78         | 2.62  | -1.06 | 0.315   | -3.65            | 2.97  | -1.23 | 0.264   | -3.79                   | 3.10  | -1.22 | 0.264   |
| Insula                            | L | -13.20        | 4.35  | -3.04 | 0.051        | -13.71        | 4.47  | -3.07 | 0.051   | -15.62           | 5.00  | -3.13 | 0.051   | -16.58                  | 5.16  | -3.22 | 0.051   |
|                                   | R | -13.20        | 4.46  | -2.96 | 0.051        | -12.35        | 4.59  | -2.69 | 0.052   | -15.91           | 5.05  | -3.15 | 0.051   | -16.12                  | 5.34  | -3.02 | 0.051   |
| <b>Subcortical</b>                |   |               |       |       |              |               |       |       |         |                  |       |       |         |                         |       |       |         |
| Cerebellum                        | L | -22.80        | 25.82 | -0.88 | 0.616        | -0.69         | 26.21 | -0.03 | 0.979   | -15.30           | 30.19 | -0.51 | 0.700   | -12.96                  | 31.25 | -0.41 | 0.736   |
|                                   | R | -19.65        | 26.53 | -0.74 | 0.633        | 3.51          | 26.99 | 0.13  | 0.911   | -9.49            | 30.92 | -0.31 | 0.796   | -7.46                   | 31.74 | -0.23 | 0.841   |
| Thalamus                          | L | -6.73         | 3.63  | -1.85 | 0.557        | -4.56         | 3.85  | -1.18 | 0.593   | -5.66            | 4.31  | -1.32 | 0.593   | -6.29                   | 4.43  | -1.42 | 0.593   |

|                |   | Externalising |      |       |         | Internalising |      |       |         | Thought disorder |      |       |         | General psychopathology |      |       |         |
|----------------|---|---------------|------|-------|---------|---------------|------|-------|---------|------------------|------|-------|---------|-------------------------|------|-------|---------|
|                |   | B             | SE   | t     | p(FD R) | B             | SE   | t     | p(FD R) | B                | SE   | t     | p(FD R) | B                       | SE   | t     | p(FD R) |
|                | R | -3.67         | 3.48 | -1.06 | 0.601   | -3.12         | 3.59 | -0.87 | 0.616   | -3.83            | 4.02 | -0.95 | 0.601   | -4.09                   | 4.16 | -0.98 | 0.601   |
| Caudate        | L | -4.65         | 2.84 | -1.64 | 0.557   | -2.79         | 2.97 | -0.94 | 0.601   | -3.31            | 3.42 | -0.97 | 0.601   | -3.76                   | 3.59 | -1.05 | 0.601   |
|                | R | -5.22         | 2.94 | -1.78 | 0.557   | -3.40         | 3.03 | -1.12 | 0.600   | -3.75            | 3.45 | -1.09 | 0.601   | -4.31                   | 3.63 | -1.19 | 0.593   |
| Putamen        | L | -2.42         | 3.62 | -0.67 | 0.634   | -2.11         | 3.81 | -0.55 | 0.684   | -3.43            | 4.35 | -0.79 | 0.631   | -3.18                   | 4.46 | -0.71 | 0.634   |
|                | R | -2.53         | 3.13 | -0.81 | 0.631   | -2.07         | 3.33 | -0.62 | 0.658   | -2.81            | 3.81 | -0.74 | 0.633   | -2.87                   | 3.92 | -0.73 | 0.633   |
| Pallidum       | L | -1.31         | 1.35 | -0.97 | 0.601   | -0.94         | 1.36 | -0.69 | 0.634   | -0.87            | 1.60 | -0.54 | 0.684   | -1.09                   | 1.64 | -0.67 | 0.634   |
|                | R | -0.43         | 1.04 | -0.42 | 0.736   | -0.42         | 1.09 | -0.38 | 0.747   | -0.71            | 1.24 | -0.57 | 0.684   | -0.63                   | 1.29 | -0.49 | 0.703   |
| Hippocampus    | L | -3.58         | 2.19 | -1.63 | 0.557   | -3.02         | 2.28 | -1.33 | 0.593   | -3.07            | 2.62 | -1.17 | 0.593   | -3.49                   | 2.62 | -1.33 | 0.593   |
|                | R | -4.26         | 2.09 | -2.04 | 0.557   | -4.77         | 2.23 | -2.14 | 0.557   | -4.68            | 2.55 | -1.83 | 0.557   | -5.18                   | 2.60 | -1.99 | 0.557   |
| Amygdala       | L | -0.91         | 1.11 | -0.82 | 0.631   | -1.31         | 1.17 | -1.12 | 0.600   | -1.03            | 1.31 | -0.78 | 0.631   | -1.18                   | 1.36 | -0.87 | 0.616   |
|                | R | -1.75         | 1.10 | -1.59 | 0.557   | -2.07         | 1.16 | -1.79 | 0.557   | -1.87            | 1.33 | -1.41 | 0.593   | -2.17                   | 1.35 | -1.60 | 0.557   |
| Accumbens area | L | -1.23         | 0.58 | -2.12 | 0.557   | -0.75         | 0.60 | -1.25 | 0.593   | -0.89            | 0.70 | -1.27 | 0.593   | -1.00                   | 0.72 | -1.40 | 0.593   |
|                | R | -0.87         | 0.52 | -1.66 | 0.557   | -0.65         | 0.53 | -1.21 | 0.593   | -0.62            | 0.61 | -1.02 | 0.601   | -0.75                   | 0.63 | -1.20 | 0.593   |

Peer Review



**Table S12:** The relationship between surface area and psychopathology controlling for parental education, income, maternal psychopathology and cognition in the ABCD Study (n=10,858)

|                        |   | Externalising |      |       |              | Internalising |      |       |              | Thought disorder |      |       |              | General psychopathology |      |       |              |
|------------------------|---|---------------|------|-------|--------------|---------------|------|-------|--------------|------------------|------|-------|--------------|-------------------------|------|-------|--------------|
|                        |   | B             | SE   | t     | p(FD R)      | B             | SE   | t     | p(FD R)      | B                | SE   | t     | p(FD R)      | B                       | SE   | t     | p(FD R)      |
| <b>Frontal</b>         |   |               |      |       |              |               |      |       |              |                  |      |       |              |                         |      |       |              |
| Caudal anterior        | L | -1.60         | 0.93 | -1.72 | 0.124        | -1.29         | 0.94 | -1.37 | 0.207        | -1.43            | 1.10 | -1.31 | 0.227        | -1.61                   | 1.14 | -1.41 | 0.199        |
| cingulate              | R | -2.78         | 0.95 | -2.92 | <b>0.037</b> | -2.00         | 1.02 | -1.97 | 0.084        | -2.61            | 1.15 | -2.27 | 0.056        | -2.75                   | 1.18 | -2.33 | 0.052        |
| Caudal middle frontal  | L | -4.62         | 2.45 | -1.89 | 0.093        | -3.77         | 2.50 | -1.51 | 0.173        | -4.18            | 2.83 | -1.48 | 0.178        | -4.66                   | 2.93 | -1.59 | 0.151        |
|                        | R | -5.72         | 2.50 | -2.29 | 0.054        | -4.92         | 2.70 | -1.82 | 0.104        | -5.38            | 3.03 | -1.78 | 0.112        | -6.07                   | 3.14 | -1.93 | 0.088        |
| Lateral orbitofrontal  | L | -4.93         | 1.60 | -3.07 | <b>0.036</b> | -3.45         | 1.73 | -1.99 | 0.081        | -4.53            | 1.91 | -2.37 | 0.050        | -4.85                   | 2.02 | -2.41 | <b>0.047</b> |
|                        | R | -4.83         | 1.70 | -2.84 | <b>0.037</b> | -3.57         | 1.82 | -1.96 | 0.085        | -4.28            | 2.06 | -2.08 | 0.073        | -4.76                   | 2.12 | -2.25 | 0.057        |
| Medial orbitofrontal   | L | -2.44         | 1.34 | -1.82 | 0.104        | -1.78         | 1.40 | -1.27 | 0.238        | -2.25            | 1.60 | -1.40 | 0.199        | -2.43                   | 1.66 | -1.47 | 0.181        |
|                        | R | -2.86         | 1.16 | -2.46 | <b>0.046</b> | -2.23         | 1.18 | -1.90 | 0.092        | -2.75            | 1.36 | -2.01 | 0.078        | -2.99                   | 1.39 | -2.15 | 0.065        |
| Paracentral            | L | -2.41         | 1.18 | -2.04 | 0.076        | -2.28         | 1.21 | -1.89 | 0.092        | -2.66            | 1.38 | -1.93 | 0.089        | -2.86                   | 1.41 | -2.03 | 0.077        |
|                        | R | -3.41         | 1.40 | -2.44 | <b>0.047</b> | -3.03         | 1.46 | -2.07 | 0.073        | -3.36            | 1.66 | -2.03 | 0.077        | -3.73                   | 1.73 | -2.16 | 0.065        |
| Pars opercularis       | L | -3.17         | 1.63 | -1.94 | 0.088        | -3.39         | 1.65 | -2.05 | 0.076        | -3.78            | 1.90 | -1.99 | 0.081        | -4.13                   | 1.95 | -2.12 | 0.069        |
|                        | R | -4.36         | 1.52 | -2.87 | <b>0.037</b> | -3.80         | 1.54 | -2.47 | 0.046        | -4.81            | 1.75 | -2.74 | <b>0.037</b> | -5.02                   | 1.81 | -2.77 | <b>0.037</b> |
| Pars orbitalis         | L | -1.30         | 0.47 | -2.79 | <b>0.037</b> | -0.99         | 0.49 | -2.04 | 0.077        | -1.15            | 0.55 | -2.08 | 0.073        | -1.28                   | 0.57 | -2.23 | 0.058        |
|                        | R | -1.51         | 0.60 | -2.53 | <b>0.043</b> | -1.25         | 0.60 | -2.07 | 0.074        | -1.59            | 0.66 | -2.39 | <b>0.048</b> | -1.68                   | 0.69 | -2.42 | <b>0.047</b> |
| Pars triangularis      | L | -3.09         | 1.19 | -2.60 | <b>0.040</b> | -2.39         | 1.25 | -1.92 | 0.090        | -2.98            | 1.42 | -2.10 | 0.071        | -3.17                   | 1.45 | -2.18 | 0.063        |
|                        | R | -3.30         | 1.52 | -2.17 | 0.064        | -2.57         | 1.58 | -1.63 | 0.142        | -3.31            | 1.74 | -1.90 | 0.092        | -3.46                   | 1.84 | -1.88 | 0.094        |
| Precentral             | L | -7.69         | 3.18 | -2.42 | 0.047        | -5.41         | 3.30 | -1.64 | 0.140        | -5.97            | 3.77 | -1.58 | 0.152        | -6.85                   | 3.79 | -1.81 | 0.105        |
|                        | R | -8.78         | 3.22 | -2.73 | <b>0.037</b> | -7.79         | 3.35 | -2.32 | 0.052        | -8.69            | 3.80 | -2.29 | 0.054        | -9.61                   | 3.95 | -2.43 | <b>0.047</b> |
| Rostral anterior       | L | -1.98         | 0.87 | -2.28 | 0.054        | -1.68         | 0.90 | -1.86 | 0.098        | -1.89            | 1.02 | -1.86 | 0.098        | -2.11                   | 1.04 | -2.03 | 0.077        |
| cingulate              | R | -2.14         | 0.75 | -2.86 | <b>0.037</b> | -1.65         | 0.83 | -2.00 | 0.081        | -2.15            | 0.90 | -2.40 | 0.047        | -2.28                   | 0.95 | -2.40 | 0.047        |
| Rostral middle frontal | L | -15.27        | 4.22 | -3.62 | <b>0.024</b> | -10.38        | 4.47 | -2.32 | 0.052        | -13.02           | 5.15 | -2.53 | 0.043        | -14.26                  | 5.26 | -2.71 | 0.037        |
|                        | R | -13.00        | 4.40 | -2.95 | <b>0.037</b> | -7.58         | 4.60 | -1.65 | 0.139        | -8.71            | 5.14 | -1.70 | 0.128        | -10.26                  | 5.17 | -1.98 | 0.081        |
| Superior frontal       | L | -18.38        | 4.53 | -4.06 | <b>0.014</b> | -14.79        | 4.93 | -3.00 | <b>0.037</b> | -17.54           | 5.54 | -3.17 | <b>0.034</b> | -19.21                  | 5.68 | -3.38 | <b>0.024</b> |
|                        | R | -16.04        | 4.75 | -3.38 | <b>0.024</b> | -14.64        | 4.98 | -2.94 | <b>0.037</b> | -16.04           | 5.80 | -2.77 | <b>0.037</b> | -17.84                  | 5.81 | -3.07 | <b>0.036</b> |
| Frontal pole           | L | -0.36         | 0.21 | -1.74 | 0.119        | -0.37         | 0.21 | -1.82 | 0.104        | -0.36            | 0.24 | -1.48 | 0.178        | -0.41                   | 0.25 | -1.65 | 0.139        |
|                        | R | -0.57         | 0.27 | -2.09 | 0.073        | -0.35         | 0.29 | -1.20 | 0.265        | -0.36            | 0.33 | -1.10 | 0.310        | -0.44                   | 0.34 | -1.30 | 0.230        |
| <b>Parietal</b>        |   |               |      |       |              |               |      |       |              |                  |      |       |              |                         |      |       |              |
| Inferior parietal      | L | -11.56        | 3.78 | -3.06 | <b>0.036</b> | -9.67         | 3.98 | -2.43 | <b>0.047</b> | -11.06           | 4.30 | -2.57 | <b>0.040</b> | -12.20                  | 4.53 | -2.69 | <b>0.037</b> |
|                        | R | -10.25        | 4.40 | -2.33 | 0.052        | -8.35         | 4.36 | -1.92 | 0.090        | -10.47           | 4.83 | -2.17 | 0.064        | -10.94                  | 5.06 | -2.16 | 0.065        |
| Isthmus cingulate      | L | -2.78         | 1.13 | -2.47 | <b>0.046</b> | -1.84         | 1.20 | -1.53 | 0.167        | -2.32            | 1.38 | -1.69 | 0.131        | -2.56                   | 1.41 | -1.82 | 0.104        |
|                        | R | -1.01         | 0.95 | -1.06 | 0.329        | -0.79         | 1.00 | -0.79 | 0.444        | -1.14            | 1.17 | -0.97 | 0.359        | -1.14                   | 1.19 | -0.96 | 0.362        |
| Post central           | L | -10.18        | 2.97 | -3.43 | <b>0.024</b> | -8.72         | 3.09 | -2.82 | <b>0.037</b> | -9.68            | 3.58 | -2.71 | <b>0.037</b> | -10.90                  | 3.60 | -3.03 | <b>0.037</b> |
|                        | R | -9.32         | 2.82 | -3.31 | <b>0.024</b> | -7.42         | 3.00 | -2.47 | <b>0.046</b> | -8.75            | 3.33 | -2.63 | <b>0.040</b> | -9.62                   | 3.44 | -2.80 | <b>0.037</b> |
| Posterior cingulate    | L | -3.16         | 1.13 | -2.79 | <b>0.037</b> | -3.06         | 1.17 | -2.62 | <b>0.040</b> | -3.58            | 1.30 | -2.75 | <b>0.037</b> | -3.79                   | 1.34 | -2.82 | <b>0.037</b> |
|                        | R | -3.32         | 1.25 | -2.66 | <b>0.038</b> | -2.56         | 1.32 | -1.94 | 0.088        | -3.23            | 1.50 | -2.15 | 0.065        | -3.44                   | 1.54 | -2.23 | 0.058        |
| Precuneus              | L | -9.24         | 2.75 | -3.36 | <b>0.024</b> | -7.16         | 2.83 | -2.53 | <b>0.043</b> | -8.32            | 3.18 | -2.61 | <b>0.040</b> | -9.25                   | 3.34 | -2.76 | <b>0.037</b> |

1  
2  
3  
4  
5  
6  
7  
8  
9  
10  
11  
12  
13  
14  
15  
16  
17  
18  
19  
20  
21  
22  
23  
24  
25  
26  
27  
28  
29  
30  
31  
32  
33  
34  
35  
36  
37  
38  
39  
40  
41  
42  
43  
44  
45  
46

|                                   |   | Externalising |      |       |              | Internalising |      |       |              | Thought disorder |      |       |              | General psychopathology |      |       |              |
|-----------------------------------|---|---------------|------|-------|--------------|---------------|------|-------|--------------|------------------|------|-------|--------------|-------------------------|------|-------|--------------|
|                                   |   | B             | SE   | t     | p(FD R)      | B             | SE   | t     | p(FD R)      | B                | SE   | t     | p(FD R)      | B                       | SE   | t     | p(FD R)      |
|                                   | R | -8.68         | 2.96 | -2.93 | <b>0.037</b> | -7.55         | 3.14 | -2.40 | <b>0.047</b> | -8.70            | 3.53 | -2.46 | <b>0.046</b> | -9.56                   | 3.60 | -2.66 | <b>0.038</b> |
| Superior parietal                 | L | -10.09        | 3.85 | -2.62 | <b>0.040</b> | -9.21         | 3.99 | -2.31 | 0.053        | -10.27           | 4.46 | -2.30 | 0.053        | -11.33                  | 4.58 | -2.47 | <b>0.046</b> |
|                                   | R | -8.63         | 3.77 | -2.29 | 0.054        | -9.10         | 3.85 | -2.36 | 0.050        | -9.84            | 4.38 | -2.25 | 0.057        | -10.80                  | 4.49 | -2.41 | <b>0.047</b> |
| Supramarginal                     | L | -8.99         | 3.51 | -2.56 | <b>0.041</b> | -7.95         | 3.55 | -2.24 | 0.058        | -9.20            | 4.06 | -2.27 | 0.056        | -10.01                  | 4.25 | -2.36 | 0.050        |
|                                   | R | -11.21        | 3.20 | -3.50 | <b>0.024</b> | -9.02         | 3.49 | -2.58 | <b>0.040</b> | -10.70           | 4.12 | -2.60 | <b>0.040</b> | -11.84                  | 4.19 | -2.83 | <b>0.037</b> |
| <b>Temporal</b>                   |   |               |      |       |              |               |      |       |              |                  |      |       |              |                         |      |       |              |
| Banks of superior temporal sulcus | L | -0.97         | 1.17 | -0.83 | 0.426        | -0.16         | 1.11 | -0.15 | 0.883        | -0.48            | 1.28 | -0.37 | 0.713        | -0.48                   | 1.31 | -0.36 | 0.718        |
|                                   | R | -1.33         | 0.90 | -1.47 | 0.180        | -0.66         | 0.92 | -0.72 | 0.476        | -1.06            | 1.06 | -1.00 | 0.352        | -1.07                   | 1.08 | -0.99 | 0.354        |
| Entorhinal                        | L | -0.60         | 0.47 | -1.27 | 0.237        | -0.37         | 0.48 | -0.77 | 0.452        | -0.51            | 0.57 | -0.90 | 0.392        | -0.54                   | 0.56 | -0.96 | 0.362        |
|                                   | R | -0.46         | 0.48 | -0.96 | 0.362        | -0.38         | 0.50 | -0.76 | 0.455        | -0.50            | 0.57 | -0.87 | 0.401        | -0.53                   | 0.60 | -0.89 | 0.397        |
| Fusiform                          | L | -5.34         | 2.31 | -2.31 | 0.053        | -3.95         | 2.38 | -1.66 | 0.137        | -4.94            | 2.72 | -1.82 | 0.104        | -5.34                   | 2.81 | -1.90 | 0.092        |
|                                   | R | -6.05         | 2.23 | -2.72 | <b>0.037</b> | -4.67         | 2.28 | -2.04 | 0.076        | -5.27            | 2.57 | -2.05 | 0.076        | -5.88                   | 2.68 | -2.19 | 0.062        |
| Inferior temporal                 | L | -7.49         | 2.66 | -2.82 | <b>0.037</b> | -5.41         | 2.83 | -1.91 | 0.091        | -6.73            | 3.18 | -2.12 | 0.069        | -7.32                   | 3.29 | -2.22 | 0.058        |
|                                   | R | -7.93         | 2.39 | -3.32 | <b>0.024</b> | -5.93         | 2.63 | -2.25 | 0.057        | -6.14            | 2.98 | -2.06 | 0.075        | -7.22                   | 3.06 | -2.36 | 0.050        |
| Middle temporal                   | L | -7.34         | 2.32 | -3.16 | <b>0.034</b> | -5.17         | 2.31 | -2.23 | 0.058        | -6.86            | 2.65 | -2.59 | <b>0.040</b> | -7.19                   | 2.71 | -2.66 | <b>0.038</b> |
|                                   | R | -8.58         | 2.42 | -3.55 | <b>0.024</b> | -6.09         | 2.58 | -2.36 | 0.050        | -7.62            | 2.83 | -2.70 | <b>0.037</b> | -8.25                   | 2.93 | -2.81 | <b>0.037</b> |
| Parahippocampal                   | L | -1.20         | 0.74 | -1.63 | 0.142        | -1.00         | 0.78 | -1.28 | 0.236        | -1.15            | 0.90 | -1.28 | 0.236        | -1.25                   | 0.93 | -1.35 | 0.214        |
|                                   | R | -0.77         | 0.76 | -1.01 | 0.348        | -0.57         | 0.76 | -0.76 | 0.458        | -0.92            | 0.89 | -1.03 | 0.338        | -0.88                   | 0.92 | -0.96 | 0.362        |
| Superior temporal                 | L | -7.92         | 2.54 | -3.12 | <b>0.036</b> | -6.64         | 2.63 | -2.52 | <b>0.043</b> | -7.46            | 3.01 | -2.48 | <b>0.046</b> | -8.28                   | 3.10 | -2.67 | <b>0.038</b> |
|                                   | R | -7.46         | 2.24 | -3.33 | <b>0.024</b> | -6.35         | 2.38 | -2.67 | <b>0.038</b> | -7.52            | 2.78 | -2.70 | <b>0.037</b> | -8.14                   | 2.84 | -2.87 | <b>0.037</b> |
| Temporal pole                     | L | -0.95         | 0.34 | -2.80 | <b>0.037</b> | -0.83         | 0.35 | -2.40 | <b>0.047</b> | -0.97            | 0.40 | -2.45 | <b>0.047</b> | -1.06                   | 0.41 | -2.60 | <b>0.040</b> |
|                                   | R | -0.33         | 0.34 | -0.99 | 0.354        | -0.33         | 0.36 | -0.92 | 0.383        | -0.30            | 0.40 | -0.73 | 0.472        | -0.35                   | 0.42 | -0.84 | 0.419        |
| Transverse temporal               | L | -0.78         | 0.45 | -1.75 | 0.116        | -0.63         | 0.45 | -1.41 | 0.199        | -0.63            | 0.52 | -1.20 | 0.265        | -0.75                   | 0.53 | -1.40 | 0.199        |
|                                   | R | -0.48         | 0.32 | -1.51 | 0.173        | -0.50         | 0.33 | -1.52 | 0.170        | -0.51            | 0.37 | -1.37 | 0.207        | -0.59                   | 0.38 | -1.53 | 0.167        |
| <b>Occipital</b>                  |   |               |      |       |              |               |      |       |              |                  |      |       |              |                         |      |       |              |
| Cuneus                            | L | -1.96         | 1.12 | -1.75 | 0.117        | -1.89         | 1.18 | -1.61 | 0.147        | -2.15            | 1.34 | -1.60 | 0.149        | -2.32                   | 1.42 | -1.64 | 0.140        |
|                                   | R | -2.28         | 1.26 | -1.81 | 0.104        | -1.86         | 1.30 | -1.44 | 0.190        | -2.03            | 1.47 | -1.38 | 0.206        | -2.31                   | 1.54 | -1.50 | 0.173        |
| Lateral occipital                 | L | -8.13         | 3.27 | -2.49 | <b>0.046</b> | -6.68         | 3.31 | -2.02 | 0.077        | -8.10            | 3.86 | -2.10 | 0.071        | -8.83                   | 3.95 | -2.24 | 0.058        |
|                                   | R | -8.54         | 3.32 | -2.57 | <b>0.040</b> | -6.56         | 3.35 | -1.96 | 0.085        | -7.94            | 3.96 | -2.01 | 0.079        | -8.59                   | 4.06 | -2.11 | 0.070        |
| Lingual                           | L | -3.02         | 2.29 | -1.31 | 0.225        | -1.92         | 2.46 | -0.78 | 0.452        | -2.99            | 2.76 | -1.08 | 0.319        | -2.96                   | 2.83 | -1.04 | 0.335        |
|                                   | R | -3.90         | 2.22 | -1.76 | 0.116        | -2.18         | 2.32 | -0.94 | 0.371        | -3.62            | 2.74 | -1.32 | 0.224        | -3.69                   | 2.74 | -1.35 | 0.214        |
| Perical carine                    | L | -1.39         | 1.30 | -1.07 | 0.325        | -1.05         | 1.36 | -0.77 | 0.452        | -1.60            | 1.55 | -1.03 | 0.338        | -1.61                   | 1.60 | -1.01 | 0.350        |
|                                   | R | -2.09         | 1.31 | -1.60 | 0.149        | -1.35         | 1.37 | -0.99 | 0.354        | -2.34            | 1.61 | -1.45 | 0.185        | -2.27                   | 1.65 | -1.37 | 0.207        |
| Insula                            | L | -3.64         | 1.26 | -2.88 | <b>0.037</b> | -3.82         | 1.36 | -2.81 | <b>0.037</b> | -4.33            | 1.54 | -2.81 | <b>0.037</b> | -4.60                   | 1.57 | -2.92 | <b>0.037</b> |
|                                   | R | -3.43         | 1.38 | -2.49 | <b>0.046</b> | -3.15         | 1.43 | -2.20 | 0.060        | -4.19            | 1.60 | -2.62 | <b>0.040</b> | -4.20                   | 1.68 | -2.51 | <b>0.045</b> |

**Table S13.** Multiple regression analyses of the relationship between grey matter volume and psychopathology in the ABCD Study, with all dimensions entered into models simultaneously (n= n=10,858)

|                            |   | Externalizing |       |       |      | Internalizing |       |       |      | Thought Disorder |       |       |      |
|----------------------------|---|---------------|-------|-------|------|---------------|-------|-------|------|------------------|-------|-------|------|
|                            |   | B             | SE    | t     | p    | B             | SE    | t     | p    | B                | SE    | t     | p    |
| <b>Frontal</b>             |   |               |       |       |      |               |       |       |      |                  |       |       |      |
| Caudal anterior cingulate  | L | -6.27         | 5.18  | -1.21 | .226 | -0.67         | 6.69  | -0.10 | .921 | -1.09            | 8.14  | -0.13 | .894 |
|                            | R | -9.55         | 5.42  | -1.76 | .079 | 1.71          | 7.28  | 0.24  | .814 | -4.57            | 8.65  | -0.53 | .597 |
| Caudal middle frontal      | L | -9.95         | 13.21 | -0.75 | .452 | -1.94         | 16.86 | -0.12 | .908 | -6.07            | 20.35 | -0.30 | .766 |
|                            | R | -15.62        | 13.47 | -1.16 | .247 | -7.34         | 16.94 | -0.43 | .665 | -5.34            | 20.06 | -0.27 | .790 |
| Lateral orbitofrontal      | L | -16.48        | 7.93  | -2.08 | .038 | 2.41          | 11.02 | 0.22  | .827 | -9.65            | 12.63 | -0.76 | .445 |
|                            | R | -17.43        | 8.20  | -2.13 | .034 | -0.56         | 10.79 | -0.05 | .959 | -7.85            | 12.85 | -0.61 | .541 |
| Medial orbitofrontal       | L | -7.03         | 6.40  | -1.10 | .272 | -4.00         | 8.58  | -0.47 | .641 | -0.42            | 9.99  | -0.04 | .966 |
|                            | R | -7.90         | 6.25  | -1.26 | .207 | -1.18         | 8.06  | -0.15 | .884 | -4.29            | 9.69  | -0.44 | .658 |
| Paracentral                | L | -4.97         | 6.21  | -0.80 | .423 | -3.98         | 7.95  | -0.50 | .617 | -3.15            | 10.01 | -0.31 | .753 |
|                            | R | -7.61         | 6.91  | -1.10 | .271 | -3.77         | 9.77  | -0.39 | .699 | -4.04            | 11.49 | -0.35 | .725 |
| Pars opercularis           | L | -4.34         | 8.71  | -0.50 | .619 | -4.01         | 11.56 | -0.35 | .729 | -4.87            | 13.42 | -0.36 | .716 |
|                            | R | -7.93         | 7.87  | -1.01 | .314 | 0.21          | 9.70  | 0.02  | .983 | -6.89            | 11.90 | -0.58 | .563 |
| Pars orbitalis             | L | -3.53         | 3.16  | -1.12 | .264 | -1.04         | 4.26  | -0.24 | .807 | -1.45            | 5.08  | -0.29 | .775 |
|                            | R | -4.39         | 3.91  | -1.12 | .262 | -0.07         | 5.42  | -0.01 | .990 | -4.73            | 6.42  | -0.74 | .461 |
| Pars triangularis          | L | -9.12         | 6.45  | -1.41 | .158 | -0.92         | 9.12  | -0.10 | .920 | -1.97            | 10.78 | -0.18 | .855 |
|                            | R | -6.97         | 7.73  | -0.90 | .368 | -0.21         | 10.14 | -0.02 | .983 | -5.01            | 11.69 | -0.43 | .668 |
| Precentral                 | L | -28.30        | 15.17 | -1.87 | .063 | -0.18         | 19.81 | -0.01 | .993 | -4.14            | 23.95 | -0.17 | .863 |
|                            | R | -24.82        | 14.24 | -1.74 | .082 | -4.35         | 19.58 | -0.22 | .824 | -12.57           | 23.55 | -0.53 | .594 |
| Rostral anterior cingulate | L | -6.76         | 4.94  | -1.37 | .172 | -2.29         | 6.65  | -0.34 | .730 | -0.36            | 7.84  | -0.05 | .963 |
|                            | R | -6.44         | 4.60  | -1.40 | .162 | 1.22          | 5.88  | 0.21  | .836 | -3.72            | 6.98  | -0.53 | .595 |
| Rostral middle frontal     | L | -45.13        | 20.92 | -2.16 | .031 | -2.70         | 27.09 | -0.10 | .921 | -16.71           | 32.68 | -0.51 | .609 |
|                            | R | -41.39        | 21.08 | -1.96 | .050 | -0.03         | 28.60 | 0.00  | .999 | 3.53             | 34.18 | 0.10  | .918 |
| Superior frontal           | L | -42.54        | 25.15 | -1.69 | .091 | -11.17        | 32.94 | -0.34 | .735 | -18.09           | 39.54 | -0.46 | .647 |
|                            | R | -29.15        | 25.22 | -1.16 | .248 | -25.64        | 33.80 | -0.76 | .448 | -15.90           | 39.53 | -0.40 | .688 |
| Frontal pole               | L | 0.04          | 1.55  | 0.02  | .981 | -2.10         | 2.23  | -0.94 | .348 | -0.04            | 2.62  | -0.02 | .986 |
|                            | R | -3.11         | 1.96  | -1.59 | .112 | -0.79         | 2.75  | -0.29 | .774 | 0.62             | 3.13  | 0.20  | .843 |
| <b>Parietal</b>            |   |               |       |       |      |               |       |       |      |                  |       |       |      |
| Inferior parietal          | L | -34.80        | 19.17 | -1.82 | .070 | -9.19         | 24.54 | -0.37 | .708 | -8.83            | 28.67 | -0.31 | .758 |
|                            | R | -33.22        | 21.47 | -1.55 | .122 | 0.83          | 27.14 | 0.03  | .976 | -20.77           | 32.73 | -0.63 | .526 |
| Isthmus cingulate          | L | -8.59         | 4.94  | -1.74 | .083 | 0.64          | 6.51  | 0.10  | .922 | -2.04            | 7.94  | -0.26 | .798 |
|                            | R | -2.36         | 4.60  | -0.51 | .609 | 0.16          | 6.38  | 0.02  | .980 | -4.74            | 7.73  | -0.61 | .540 |
| Postcentral                | L | -23.22        | 14.23 | -1.63 | .103 | -8.83         | 19.56 | -0.45 | .652 | -5.46            | 23.71 | -0.23 | .818 |
|                            | R | -22.94        | 13.48 | -1.70 | .089 | -3.40         | 18.52 | -0.18 | .854 | -8.43            | 21.45 | -0.39 | .694 |
| Posterior cingulate        | L | -6.48         | 5.45  | -1.19 | .235 | -3.43         | 7.74  | -0.44 | .658 | -5.54            | 8.73  | -0.63 | .526 |
| Posterior cingulate        | R | -9.61         | 6.13  | -1.57 | .118 | 0.03          | 7.87  | 0.00  | .997 | -3.28            | 9.80  | -0.34 | .738 |
| Precuneus                  | L | -24.49        | 12.98 | -1.89 | .060 | -4.37         | 17.27 | -0.25 | .801 | -7.38            | 20.66 | -0.36 | .721 |
|                            | R | -20.23        | 13.72 | -1.47 | .141 | -10.72        | 17.54 | -0.61 | .542 | -5.81            | 22.60 | -0.26 | .797 |

1  
2  
3  
4  
5  
6  
7  
8  
9  
10  
11  
12  
13  
14  
15  
16  
17  
18  
19  
20  
21  
22  
23  
24  
25  
26  
27  
28  
29  
30  
31  
32  
33  
34  
35  
36  
37  
38  
39  
40  
41  
42  
43  
44  
45  
46

|                                   |   | Externalizing |       |       |      | Internalizing |       |       |      | Thought Disorder |       |       |      |
|-----------------------------------|---|---------------|-------|-------|------|---------------|-------|-------|------|------------------|-------|-------|------|
|                                   |   | B             | SE    | t     | p    | B             | SE    | t     | p    | B                | SE    | t     | p    |
| Superior parietal                 | L | -20.56        | 17.11 | -1.20 | .230 | -7.04         | 24.11 | -0.29 | .770 | -8.22            | 28.77 | -0.29 | .775 |
|                                   | R | -16.47        | 18.45 | -0.89 | .373 | -11.14        | 23.92 | -0.47 | .642 | -11.57           | 29.58 | -0.39 | .696 |
| Supramarginal                     | L | -25.96        | 17.17 | -1.51 | .131 | -4.53         | 23.01 | -0.20 | .844 | -13.14           | 28.13 | -0.47 | .641 |
|                                   | R | -32.95        | 16.35 | -2.01 | .044 | 0.06          | 21.56 | 0.00  | .998 | -15.65           | 26.41 | -0.59 | .554 |
| <b>Temporal</b>                   |   |               |       |       |      |               |       |       |      |                  |       |       |      |
| Banks of Superior Temporal Sulcus | L | -6.14         | 5.23  | -1.18 | .240 | -0.28         | 6.74  | -0.04 | .967 | 1.50             | 8.03  | 0.19  | .852 |
|                                   | R | -5.19         | 4.25  | -1.22 | .222 | 3.13          | 5.91  | 0.53  | .597 | -2.98            | 7.02  | -0.42 | .671 |
| Entorhinal                        | L | -2.83         | 3.29  | -0.86 | .390 | -1.99         | 4.36  | -0.46 | .649 | -1.69            | 5.03  | -0.34 | .737 |
|                                   | R | -3.44         | 3.32  | -1.04 | .300 | 0.02          | 4.21  | 0.00  | .997 | -1.39            | 5.20  | -0.27 | .790 |
| Fusiform                          | L | -25.20        | 13.63 | -1.85 | .065 | 3.70          | 18.99 | 0.20  | .845 | -7.41            | 21.79 | -0.34 | .734 |
|                                   | R | -23.73        | 12.90 | -1.84 | .066 | -0.71         | 17.24 | -0.04 | .967 | -7.39            | 19.68 | -0.38 | .707 |
| Inferior temporal                 | L | -29.32        | 15.77 | -1.86 | .063 | -2.49         | 22.05 | -0.11 | .910 | -5.81            | 25.60 | -0.23 | .821 |
|                                   | R | -33.84        | 14.83 | -2.28 | .023 | -10.98        | 21.46 | -0.51 | .609 | 8.69             | 25.02 | 0.35  | .729 |
| Middle temporal                   | L | -23.93        | 14.74 | -1.62 | .105 | -3.88         | 19.91 | -0.20 | .845 | -8.29            | 23.69 | -0.35 | .726 |
|                                   | R | -27.96        | 14.89 | -1.88 | .061 | -1.34         | 20.97 | -0.06 | .949 | -13.79           | 24.06 | -0.57 | .567 |
| Parahippocampal                   | L | -5.42         | 3.80  | -1.42 | .155 | 0.11          | 5.11  | 0.02  | .983 | -1.67            | 6.11  | -0.27 | .785 |
|                                   | R | -2.18         | 3.67  | -0.59 | .553 | 2.33          | 4.86  | 0.48  | .632 | -5.25            | 6.06  | -0.87 | .387 |
| Superior temporal                 | L | -21.73        | 14.55 | -1.49 | .136 | -8.01         | 19.22 | -0.42 | .677 | -5.48            | 22.70 | -0.24 | .809 |
|                                   | R | -17.46        | 12.73 | -1.37 | .171 | -6.17         | 17.67 | -0.35 | .727 | -9.71            | 21.35 | -0.45 | .650 |
| Temporal pole                     | L | -1.95         | 3.23  | -0.60 | .547 | -2.46         | 4.63  | -0.53 | .596 | -2.08            | 5.19  | -0.40 | .689 |
|                                   | R | -0.16         | 3.06  | -0.05 | .957 | -0.09         | 4.20  | -0.02 | .984 | -0.76            | 4.78  | -0.16 | .873 |
| Transverse temporal               | L | -2.01         | 2.34  | -0.86 | .391 | -1.58         | 3.03  | -0.52 | .602 | 0.68             | 3.62  | 0.19  | .851 |
|                                   | R | -0.55         | 1.78  | -0.31 | .757 | -1.79         | 2.36  | -0.76 | .449 | -1.06            | 2.87  | -0.37 | .713 |
| <b>Occipital</b>                  |   |               |       |       |      |               |       |       |      |                  |       |       |      |
| Cuneus                            | L | -3.73         | 4.76  | -0.78 | .434 | -2.15         | 6.42  | -0.33 | .738 | -0.02            | 7.65  | 0.00  | .998 |
|                                   | R | -5.88         | 5.54  | -1.06 | .289 | -2.09         | 7.69  | -0.27 | .786 | 1.42             | 9.16  | 0.15  | .877 |
| Lateral occipital                 | L | -20.81        | 14.49 | -1.44 | .151 | -2.47         | 20.06 | -0.12 | .902 | -9.86            | 24.51 | -0.40 | .688 |
|                                   | R | -25.28        | 15.18 | -1.67 | .096 | -0.33         | 20.60 | -0.02 | .987 | -13.94           | 24.46 | -0.57 | .569 |
| Lingual                           | L | -7.01         | 9.76  | -0.72 | .473 | 0.31          | 13.48 | 0.02  | .982 | -6.05            | 16.17 | -0.37 | .708 |
|                                   | R | -10.15        | 9.43  | -1.08 | .282 | 1.70          | 13.53 | 0.13  | .900 | -7.74            | 16.19 | -0.48 | .633 |
| Perical carine                    | L | -1.08         | 3.44  | -0.31 | .754 | -1.81         | 4.90  | -0.37 | .712 | -2.49            | 5.79  | -0.43 | .668 |
|                                   | R | -3.18         | 3.68  | -0.86 | .388 | 1.22          | 5.13  | 0.24  | .813 | -3.85            | 5.85  | -0.66 | .511 |
| <b>Insula</b>                     | L | -8.79         | 6.69  | -1.31 | .189 | -5.30         | 9.11  | -0.58 | .561 | -6.29            | 10.55 | -0.60 | .551 |
|                                   | R | -8.03         | 6.67  | -1.20 | .229 | -0.73         | 9.27  | -0.08 | .938 | -11.73           | 10.66 | -1.10 | .272 |

**Note:** Uncorrected p-values reported, none of the p-values passed FDR correction

**Table S14.** Multiple regression analyses of the relationship between surface area and psychopathology in the ABCD Study, with all dimensions entered into models simultaneously (n=10,858)

|                            |   | Externalizing |      |       |      | Internalizing |       |       |      | Thought Disorder |       |       |      |
|----------------------------|---|---------------|------|-------|------|---------------|-------|-------|------|------------------|-------|-------|------|
|                            |   | B             | SE   | t     | p    | B             | SE    | t     | p    | B                | SE    | t     | p    |
| <b>Frontal</b>             |   |               |      |       |      |               |       |       |      |                  |       |       |      |
| Caudal anterior cingulate  | L | -1.88         | 1.42 | -1.32 | .188 | -0.17         | 1.79  | -0.09 | .926 | -0.42            | 2.17  | -0.19 | .847 |
|                            | R | -2.85         | 1.50 | -1.89 | .059 | 0.47          | 2.02  | 0.23  | .816 | -1.32            | 2.40  | -0.55 | .583 |
| Caudal middle frontal      | L | -4.53         | 3.78 | -1.20 | .232 | -0.67         | 4.84  | -0.14 | .890 | -1.62            | 5.83  | -0.28 | .782 |
|                            | R | -4.87         | 3.90 | -1.25 | .212 | -2.41         | 5.05  | -0.48 | .633 | -1.00            | 6.07  | -0.17 | .869 |
| Lateral orbitofrontal      | L | -5.07         | 2.42 | -2.10 | .037 | 1.11          | 3.28  | 0.34  | .736 | -2.58            | 3.81  | -0.68 | .499 |
|                            | R | -5.11         | 2.53 | -2.02 | .044 | 0.36          | 3.37  | 0.11  | .914 | -2.10            | 4.03  | -0.52 | .603 |
| Medial orbitofrontal       | L | -2.43         | 2.13 | -1.14 | .254 | -0.52         | 2.70  | -0.19 | .847 | -0.81            | 3.32  | -0.24 | .808 |
|                            | R | -2.88         | 1.74 | -1.66 | .098 | -0.10         | 2.21  | -0.04 | .966 | -1.38            | 2.68  | -0.52 | .606 |
| Paracentral                | L | -1.35         | 1.84 | -0.73 | .463 | -1.14         | 2.36  | -0.48 | .630 | -1.00            | 2.91  | -0.34 | .732 |
|                            | R | -2.63         | 2.09 | -1.26 | .210 | -1.13         | 2.98  | -0.38 | .706 | -0.87            | 3.49  | -0.25 | .804 |
| Pars opercularis           | L | -2.22         | 2.46 | -0.90 | .366 | -1.13         | 3.27  | -0.35 | .730 | -1.65            | 3.80  | -0.43 | .664 |
|                            | R | -2.97         | 2.42 | -1.23 | .220 | 0.27          | 2.85  | 0.09  | .925 | -2.62            | 3.53  | -0.74 | .458 |
| Pars orbitalis             | L | -1.35         | 0.71 | -1.91 | .057 | -0.07         | 0.95  | -0.07 | .943 | -0.33            | 1.15  | -0.29 | .774 |
|                            | R | -1.30         | 0.92 | -1.41 | .158 | 0.03          | 1.22  | 0.03  | .979 | -0.92            | 1.43  | -0.65 | .519 |
| Pars triangularis          | L | -2.81         | 1.76 | -1.60 | .111 | 0.09          | 2.48  | 0.04  | .971 | -1.31            | 2.94  | -0.45 | .656 |
|                            | R | -3.00         | 2.22 | -1.35 | .178 | 0.26          | 3.03  | 0.09  | .931 | -1.88            | 3.44  | -0.55 | .585 |
| Precentral                 | L | -9.14         | 4.93 | -1.85 | .064 | -1.22         | 6.33  | -0.19 | .847 | -0.72            | 7.56  | -0.10 | .924 |
|                            | R | -7.47         | 4.83 | -1.55 | .122 | -2.31         | 6.89  | -0.34 | .737 | -3.07            | 8.23  | -0.37 | .710 |
| Rostral anterior cingulate | L | -1.84         | 1.32 | -1.39 | .164 | -0.40         | 1.83  | -0.22 | .829 | -0.59            | 2.11  | -0.28 | .782 |
|                            | R | -1.94         | 1.23 | -1.58 | .114 | 0.40          | 1.56  | 0.26  | .796 | -1.27            | 1.87  | -0.68 | .496 |
| Rostral middle frontal     | L | -16.92        | 6.66 | -2.54 | .011 | 1.88          | 8.79  | 0.21  | .830 | -5.41            | 10.97 | -0.49 | .622 |
|                            | R | -17.35        | 6.92 | -2.51 | .012 | 2.09          | 9.19  | 0.23  | .820 | 0.27             | 11.27 | 0.02  | .981 |
| Superior frontal           | L | -15.38        | 7.21 | -2.14 | .033 | -2.11         | 9.81  | -0.21 | .830 | -6.61            | 11.64 | -0.57 | .571 |
|                            | R | -11.95        | 7.36 | -1.62 | .105 | -5.72         | 10.07 | -0.57 | .570 | -5.48            | 12.07 | -0.45 | .650 |
| Frontal pole               | L | -0.26         | 0.31 | -0.82 | .414 | -0.31         | 0.44  | -0.70 | .487 | 0.00             | 0.51  | -0.01 | .994 |
|                            | R | -0.75         | 0.42 | -1.81 | .071 | -0.05         | 0.56  | -0.10 | .922 | 0.15             | 0.64  | 0.23  | .821 |
| <b>Parietal</b>            |   |               |      |       |      |               |       |       |      |                  |       |       |      |
| Inferior parietal          | L | -10.82        | 5.99 | -1.80 | .072 | -2.31         | 7.72  | -0.30 | .764 | -2.58            | 8.81  | -0.29 | .770 |
|                            | R | -10.41        | 6.63 | -1.57 | .117 | -0.78         | 8.43  | -0.09 | .926 | -5.34            | 10.03 | -0.53 | .594 |
| Isthmus cingulate          | L | -3.10         | 1.62 | -1.91 | .057 | 0.58          | 2.18  | 0.27  | .790 | -1.11            | 2.63  | -0.42 | .674 |
|                            | R | -1.08         | 1.41 | -0.76 | .446 | 0.31          | 1.98  | 0.16  | .875 | -1.13            | 2.44  | -0.46 | .642 |
| Postcentral                | L | -9.13         | 4.54 | -2.01 | .045 | -3.13         | 6.15  | -0.51 | .611 | -1.31            | 7.52  | -0.17 | .862 |
|                            | R | -9.00         | 4.26 | -2.11 | .035 | -1.55         | 5.87  | -0.26 | .791 | -2.33            | 6.82  | -0.34 | .733 |
| Posterior cingulate        | L | -2.39         | 1.71 | -1.40 | .161 | -0.97         | 2.45  | -0.40 | .691 | -1.88            | 2.77  | -0.68 | .498 |
|                            | R | -3.38         | 1.97 | -1.72 | .086 | 0.21          | 2.49  | 0.08  | .933 | -1.35            | 3.18  | -0.43 | .671 |
| Precuneus                  | L | -9.35         | 4.15 | -2.26 | .024 | -1.13         | 5.64  | -0.20 | .841 | -2.35            | 6.82  | -0.34 | .730 |
|                            | R | -7.35         | 4.62 | -1.59 | .112 | -2.68         | 6.23  | -0.43 | .667 | -3.35            | 7.94  | -0.42 | .673 |

1  
2  
3  
4  
5  
6  
7  
8  
9  
10  
11  
12  
13  
14  
15  
16  
17  
18  
19  
20  
21  
22  
23  
24  
25  
26  
27  
28  
29  
30  
31  
32  
33  
34  
35  
36  
37  
38  
39  
40  
41  
42  
43  
44  
45  
46

|                                   |   | Externalizing |      |       |      | Internalizing |      |       |      | Thought Disorder |      |       |      |
|-----------------------------------|---|---------------|------|-------|------|---------------|------|-------|------|------------------|------|-------|------|
|                                   |   | B             | SE   | t     | p    | B             | SE   | t     | p    | B                | SE   | t     | p    |
| Superior parietal                 | L | -8.31         | 5.68 | -1.46 | .144 | -2.67         | 8.07 | -0.33 | .741 | -1.86            | 9.44 | -0.20 | .844 |
|                                   | R | -5.45         | 5.95 | -0.91 | .361 | -4.13         | 7.76 | -0.53 | .595 | -3.90            | 9.60 | -0.41 | .684 |
| Supramarginal                     | L | -8.83         | 5.18 | -1.70 | .089 | -1.96         | 7.08 | -0.28 | .782 | -3.41            | 8.47 | -0.40 | .687 |
|                                   | R | -10.86        | 4.89 | -2.22 | .027 | -0.70         | 6.82 | -0.10 | .918 | -3.64            | 8.17 | -0.45 | .656 |
| <b>Temporal</b>                   |   |               |      |       |      |               |      |       |      |                  |      |       |      |
| Banks of Superior Temporal Sulcus | L | -2.00         | 1.76 | -1.14 | .256 | 0.81          | 2.22 | 0.37  | .715 | -0.51            | 2.62 | -0.19 | .847 |
|                                   | R | -1.80         | 1.36 | -1.32 | .187 | 0.82          | 1.90 | 0.43  | .667 | -1.02            | 2.24 | -0.45 | .650 |
| Entorhinal                        | L | -0.66         | 0.71 | -0.93 | .350 | 0.07          | 0.96 | 0.07  | .945 | -0.41            | 1.12 | -0.37 | .715 |
|                                   | R | -0.46         | 0.71 | -0.65 | .515 | -0.09         | 0.97 | -0.09 | .928 | -0.23            | 1.13 | -0.21 | .836 |
| Fusiform                          | L | -6.93         | 3.54 | -1.96 | .051 | 0.56          | 4.74 | 0.12  | .905 | -1.84            | 5.55 | -0.33 | .740 |
|                                   | R | -7.17         | 3.45 | -2.08 | .038 | -0.62         | 4.65 | -0.13 | .895 | -0.77            | 5.39 | -0.14 | .887 |
| Inferior temporal                 | L | -7.68         | 3.93 | -1.95 | .051 | 0.27          | 5.59 | 0.05  | .961 | -2.67            | 6.50 | -0.41 | .682 |
|                                   | R | -9.49         | 3.69 | -2.57 | .010 | -2.35         | 5.29 | -0.44 | .657 | 1.44             | 6.10 | 0.24  | .813 |
| Middle temporal                   | L | -7.20         | 3.60 | -2.00 | .046 | 1.51          | 4.75 | 0.32  | .751 | -3.83            | 5.69 | -0.67 | .501 |
|                                   | R | -9.23         | 3.74 | -2.47 | .014 | 0.59          | 5.27 | 0.11  | .911 | -3.36            | 6.01 | -0.56 | .577 |
| Parahippocampal                   | L | -1.22         | 1.17 | -1.04 | .298 | -0.21         | 1.53 | -0.14 | .890 | -0.45            | 1.84 | -0.25 | .806 |
|                                   | R | -0.85         | 1.20 | -0.71 | .478 | 0.56          | 1.50 | 0.38  | .706 | -1.34            | 1.90 | -0.70 | .481 |
| Superior temporal                 | L | -8.35         | 4.02 | -2.07 | .039 | -1.15         | 5.07 | -0.23 | .821 | -1.75            | 5.87 | -0.30 | .766 |
|                                   | R | -6.81         | 3.48 | -1.96 | .051 | -0.34         | 4.78 | -0.07 | .944 | -3.52            | 5.77 | -0.61 | .542 |
| Temporal pole                     | L | -0.69         | 0.53 | -1.30 | .195 | -0.18         | 0.70 | -0.26 | .793 | -0.23            | 0.84 | -0.27 | .785 |
|                                   | R | -0.20         | 0.51 | -0.39 | .700 | -0.31         | 0.70 | -0.45 | .655 | 0.07             | 0.76 | 0.10  | .923 |
| Transverse temporal               | L | -0.90         | 0.69 | -1.30 | .193 | -0.29         | 0.87 | -0.34 | .736 | 0.25             | 1.03 | 0.25  | .806 |
|                                   | R | -0.35         | 0.48 | -0.73 | .463 | -0.26         | 0.63 | -0.41 | .679 | -0.23            | 0.77 | -0.29 | .769 |
| <b>Occipital</b>                  |   |               |      |       |      |               |      |       |      |                  |      |       |      |
| Cuneus                            | L | -1.94         | 1.75 | -1.11 | .267 | -0.20         | 2.28 | -0.09 | .929 | -0.73            | 2.79 | -0.26 | .793 |
|                                   | R | -2.80         | 1.98 | -1.41 | .158 | 0.09          | 2.70 | 0.03  | .973 | -0.44            | 3.15 | -0.14 | .890 |
| Lateral occipital                 | L | -7.22         | 4.92 | -1.47 | .142 | -0.24         | 6.71 | -0.04 | .971 | -4.80            | 8.36 | -0.57 | .566 |
|                                   | R | -8.53         | 4.94 | -1.73 | .085 | -0.01         | 6.80 | 0.00  | .998 | -4.12            | 8.33 | -0.49 | .621 |
| Lingual                           | L | -3.24         | 3.42 | -0.95 | .343 | 1.03          | 4.93 | 0.21  | .835 | -2.41            | 5.80 | -0.42 | .678 |
|                                   | R | -5.06         | 3.25 | -1.56 | .120 | 2.77          | 4.83 | 0.57  | .568 | -3.61            | 5.79 | -0.62 | .533 |
| Perical carine                    | L | -1.66         | 1.86 | -0.89 | .372 | 0.84          | 2.66 | 0.32  | .751 | -1.85            | 3.10 | -0.60 | .551 |
|                                   | R | -2.67         | 2.00 | -1.34 | .182 | 2.09          | 2.70 | 0.77  | .440 | -3.16            | 3.18 | -0.99 | .321 |
| <b>Insula</b>                     |   |               |      |       |      |               |      |       |      |                  |      |       |      |
|                                   | L | -2.33         | 1.97 | -1.18 | .237 | -1.46         | 2.74 | -0.54 | .593 | -1.85            | 3.17 | -0.58 | .560 |
|                                   | R | -1.99         | 2.08 | -0.96 | .339 | 0.04          | 2.84 | 0.02  | .988 | -3.59            | 3.27 | -1.10 | .271 |

**Note:** Uncorrected p-values reported, none of the p-values passed FDR correction
